# Supplementary material for: Insights into LiAlH4 Catalyzed Imine Hydrogenation
Source: PubMed Central journal article supplement (PMC7839755; doi:10.1002/chem.202003862), 2020-11-26
Supplement: CHEM-27-401-s001.pdf [file CHEM-27-401-s001.pdf]

# Chemistry–A European Journal

Supporting Information

## Insights into $\text{LiAlH}_4$ Catalyzed Imine Hydrogenation

Holger Elsen, Jens Langer, Gerd Ballmann, Michael Wiesinger, and Sjoerd Harder\*<sup>[a]</sup>

## Table of contents

|                                   |     |
|-----------------------------------|-----|
| General.....                      | S2  |
| NMR-Spectra.....                  | S3  |
| Crystallographic Information..... | S23 |
| DFT Calculations.....             | S34 |
| References.....                   | S59 |

## General

All experiments were carried out in dry glassware under N<sub>2</sub> using standard Schlenk techniques and freshly dried and degassed solvents (all solvents were dried over a column except for THF which was dried over Na-benzophenone and redistilled). Commercially available LiAlH<sub>4</sub> was extracted with diethyl ether and after removal of all solvents dried in vacuo to give a white fluffy material. Commercially available NaAlH<sub>4</sub> was purified via a similar method using THF·KAlH<sub>4</sub>·[18-crown-6/THF] was prepared according to Trzaska.<sup>[S1]</sup> Ph(H)C=NtBu was obtained commercially from Sigma-Aldrich, 97 %. Following imine substrates were prepared according to literature procedures:

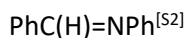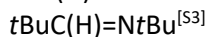

Hydrogen of quality N5 has been used for catalytic hydrogenation. Deuterated solvents were dried over molsieves (3 Å) in a glovebox. All substrates were dried by stirring over freshly powdered CaH<sub>2</sub> at 60 °C. Reactors were dried by heating overnight in an oven at 70 °C. The products of catalysis have been analyzed by NMR. Conversions were determined by integration of characteristic signals.

NMR spectra were measured on Bruker Avance III HD 400 MHz and Bruker Avance III HD 600 MHz spectrometers. Elemental analysis was performed with an Hekatech Eurovector EA3000 analyzer. Crystal structures have been measured on a SuperNova (Agilent) diffractometer with dual Cu and Mo microfocus sources and an Atlas S2 detector. Crystallographic data have been deposited with the Cambridge Crystallographic Data Centre as supplementary publication 2024356-2024363.

# NMR-Spectra

## Reference Spectra

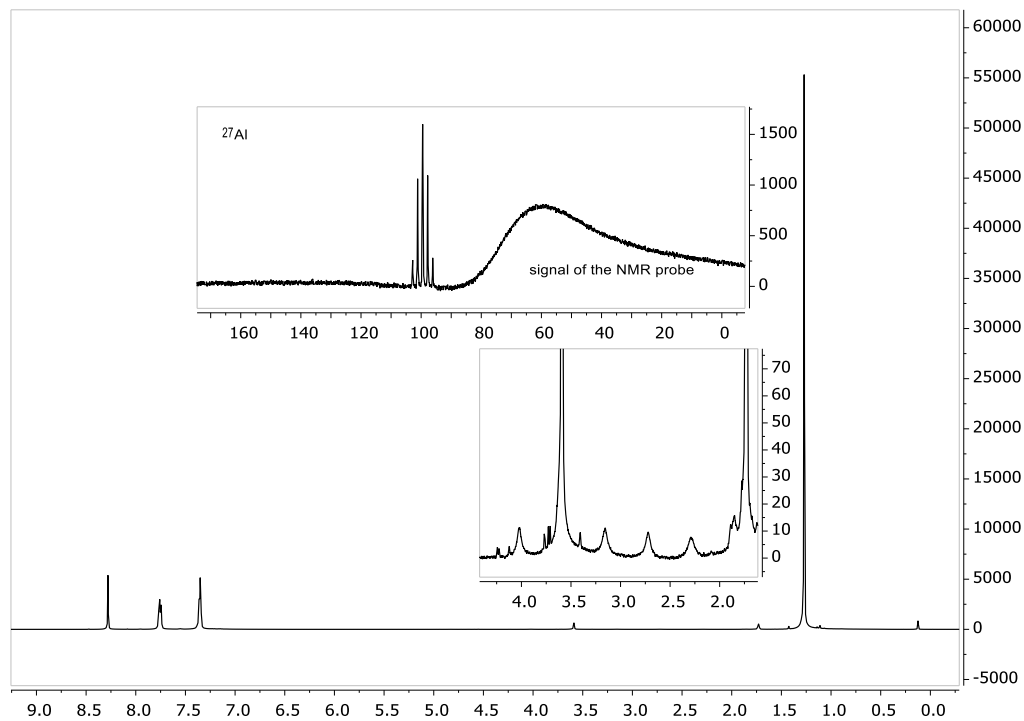

Figure S1: Reference spectra of  $\text{KAlH}_4$  produced by the reaction of  $\text{KH}$  with  $\text{AlH}_3\text{THF}_2$  in pure  $\text{PhC(H)=NtBu}$  (no-D-NMR).

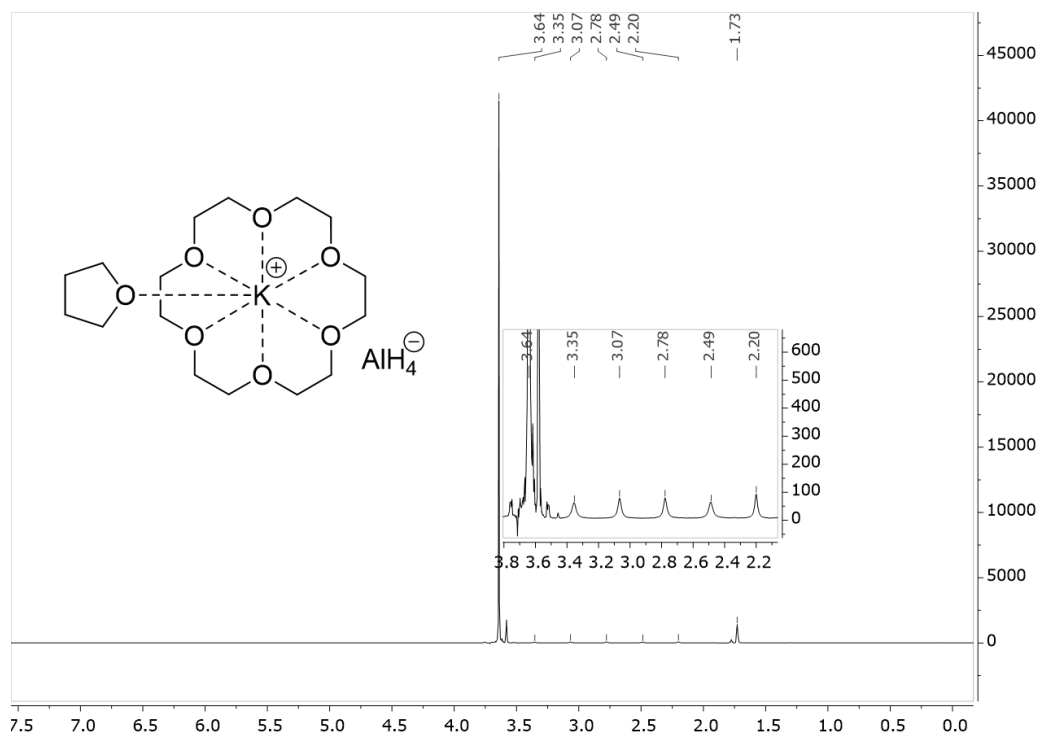

Figure S2: Reference  $^1\text{H}$ -NMR of  $\text{KAlH}_4 \cdot [18\text{-crown-6/THF}]$  in  $\text{THF-d}_8$ .

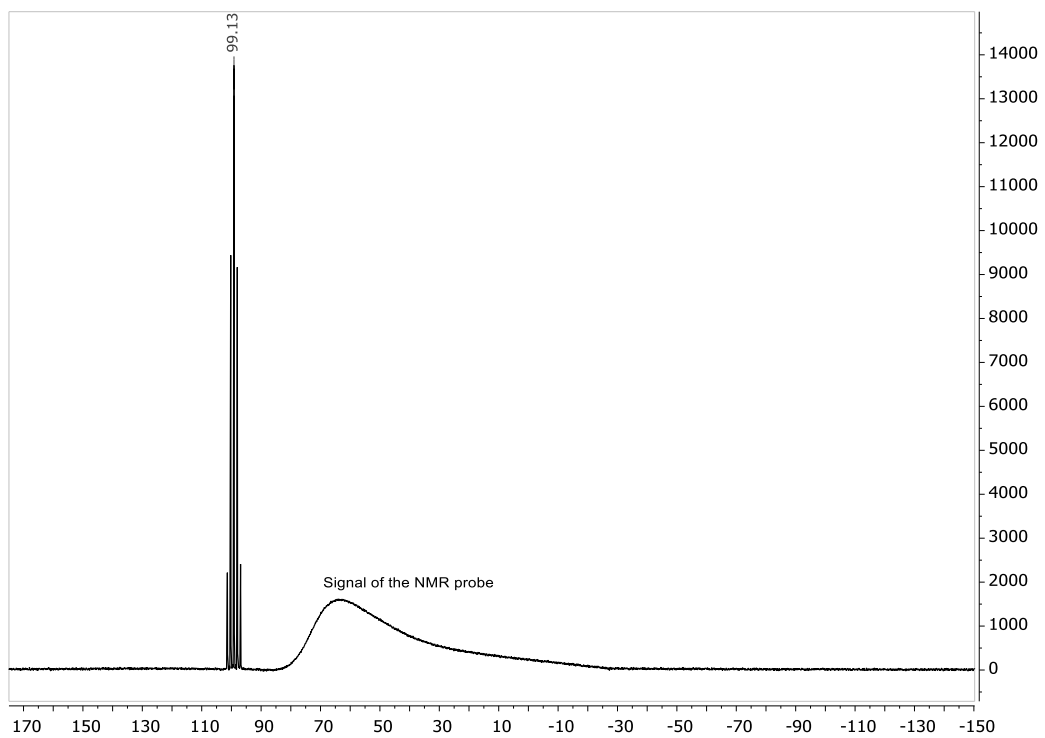

Figure S3: Reference  $^{27}\text{Al}$ -NMR of  $\text{KAlH}_4 \cdot [18\text{-crown-6/THF}]$  in  $\text{THF-}d_8$ .

### Catalytic reductions

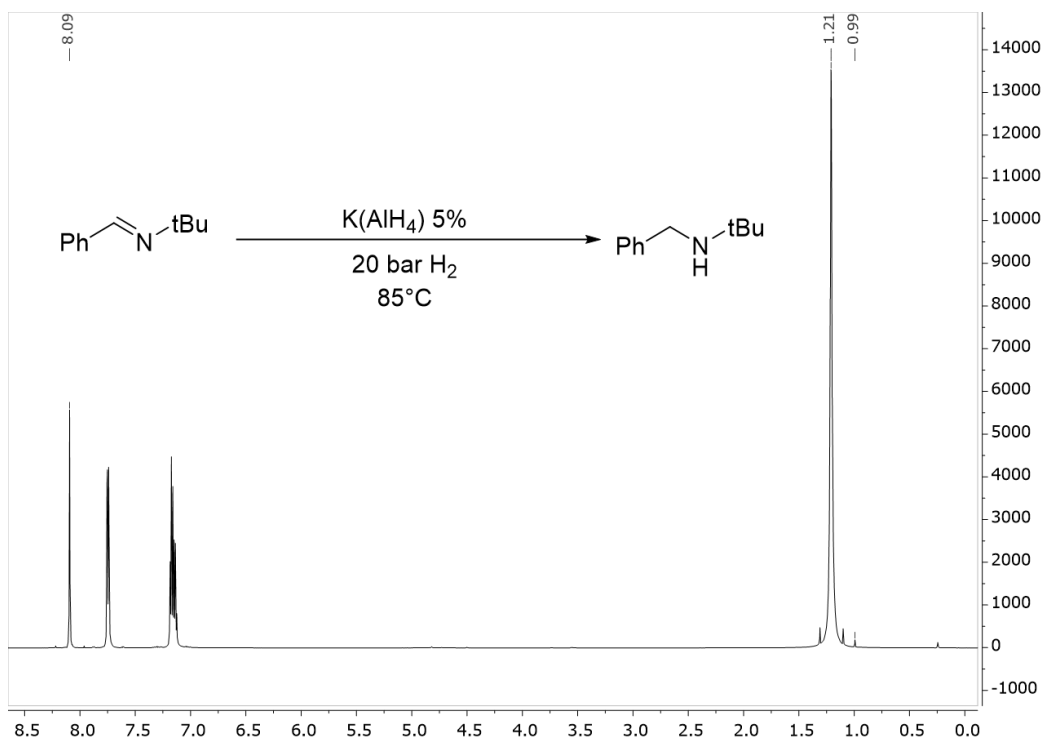

Figure S4: Catalytic reduction of  $\text{PhCH}(\text{H})=\text{NtBu}$  using 5 mol%  $\text{KAlH}_4$  at 20 bar  $\text{H}_2$  and  $85^\circ\text{C}$  in neat imine after 24h. NMR in  $\text{C}_6\text{D}_6$ .

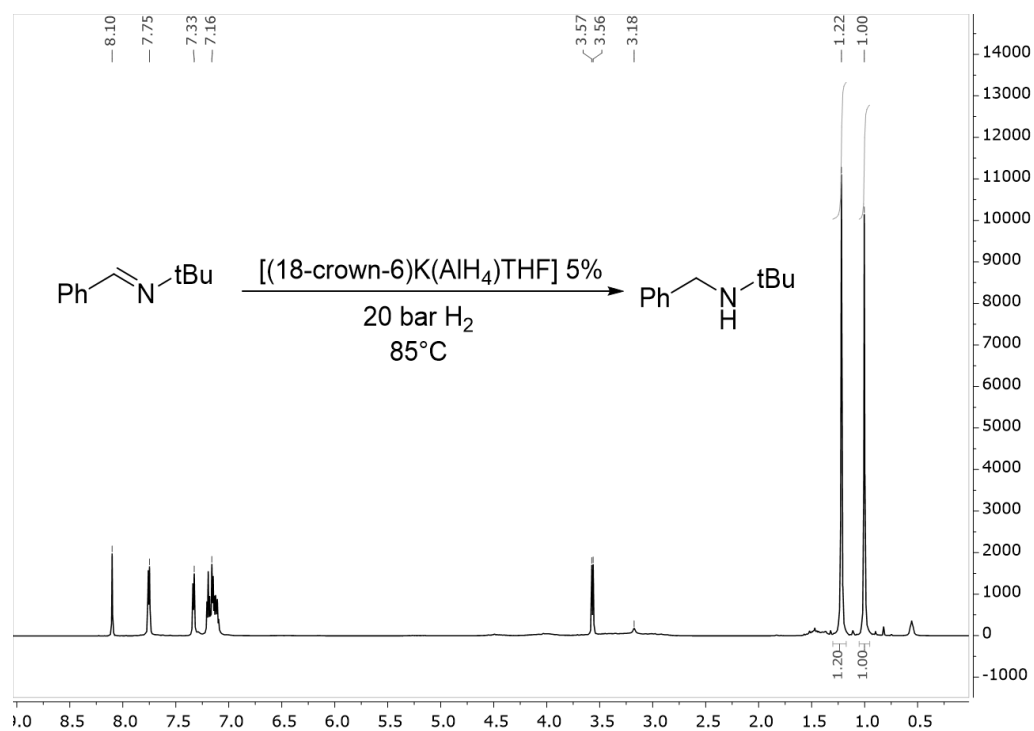

Figure S5: Catalytic reduction of  $\text{PhC(H)=NtBu}$  using 5 mol%  $[(18\text{-crown-}6)\text{K}(\text{AlH}_4)\text{THF}]$  at 20 bar  $\text{H}_2$  and 85°C in neat imine after 24h. NMR in  $\text{C}_6\text{D}_6$ .

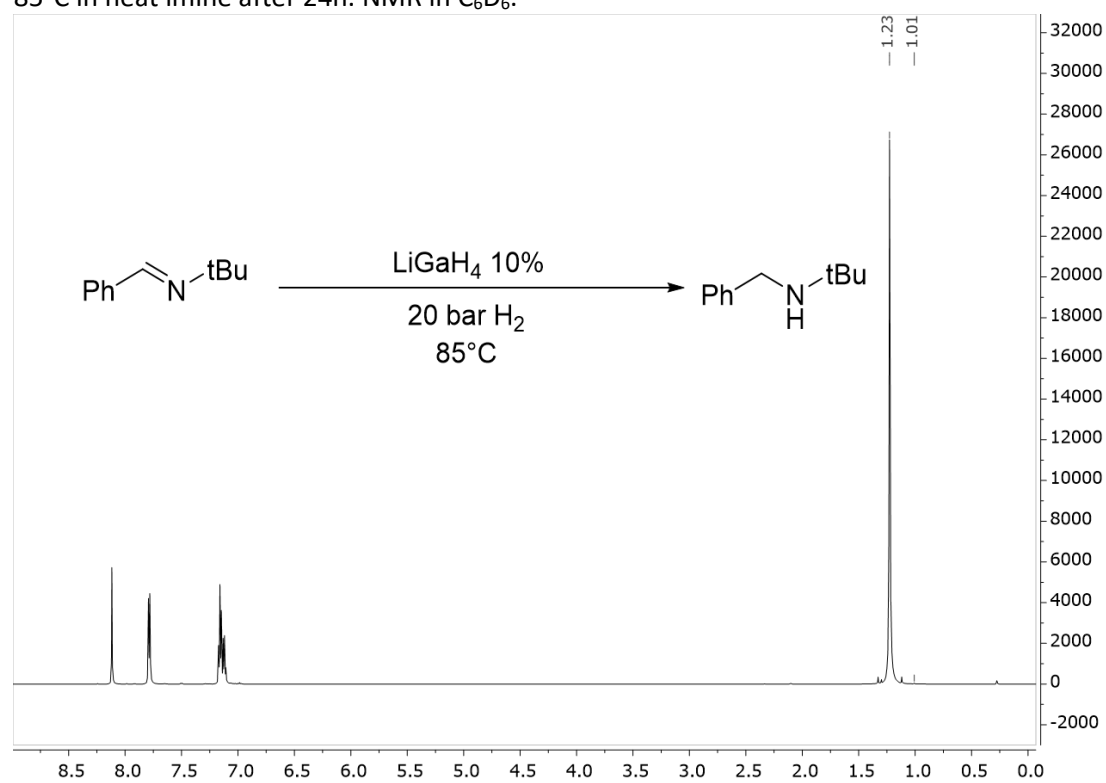

Figure S6: Catalytic reduction of  $\text{PhC(H)=NtBu}$  using 10 mol%  $\text{LiGaH}_4(\text{TMEDA})_2$  at 20 bar  $\text{H}_2$  and 85°C in neat imine after 24h. NMR in  $\text{C}_6\text{D}_6$ .

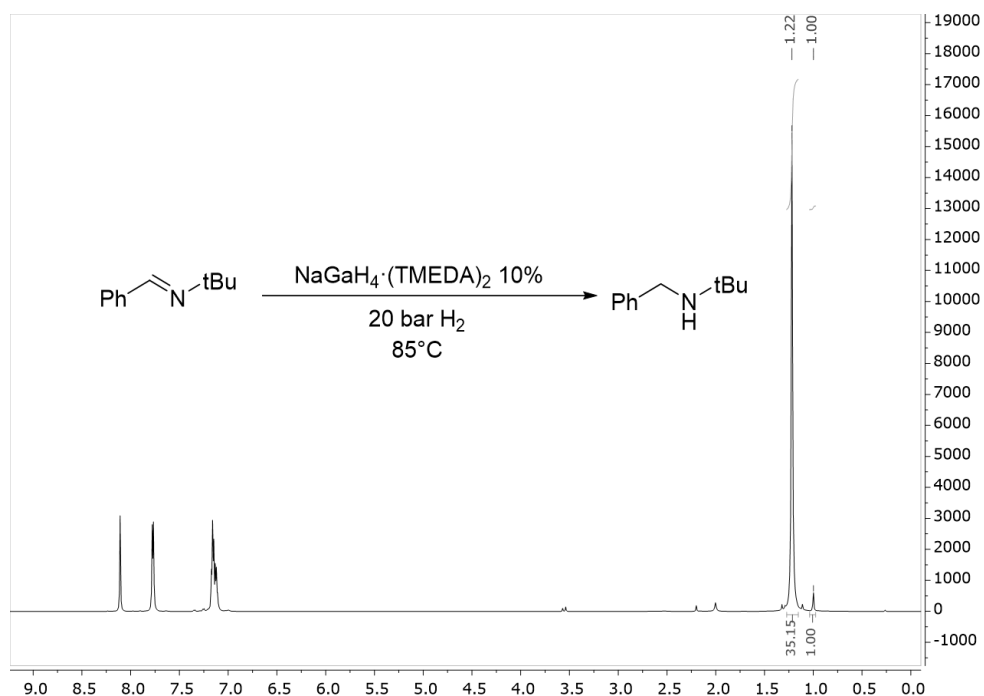

Figure S7: Catalytic reduction of PhC(H)=NtBu using 10 mol% NaGaH<sub>4</sub>·(TMEDA)<sub>2</sub> at 20 bar H<sub>2</sub> and 85°C in neat imine after 24h. NMR in C<sub>6</sub>D<sub>6</sub>.

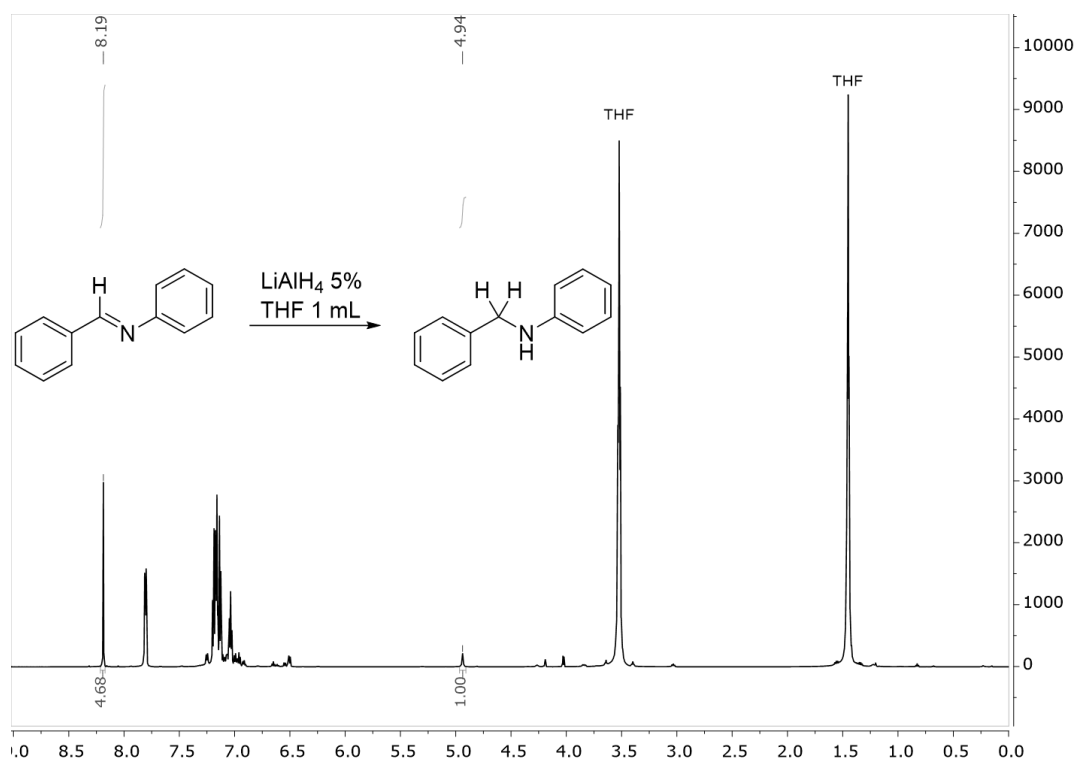

Figure S8: <sup>1</sup>H-NMR of the reduction of PhC(H)=NPh imine with LiAlH<sub>4</sub> (5mol%) at 85°C under 20 atm. H<sub>2</sub> after 4 days. NMR in C<sub>6</sub>D<sub>6</sub>

## Complex Spectra

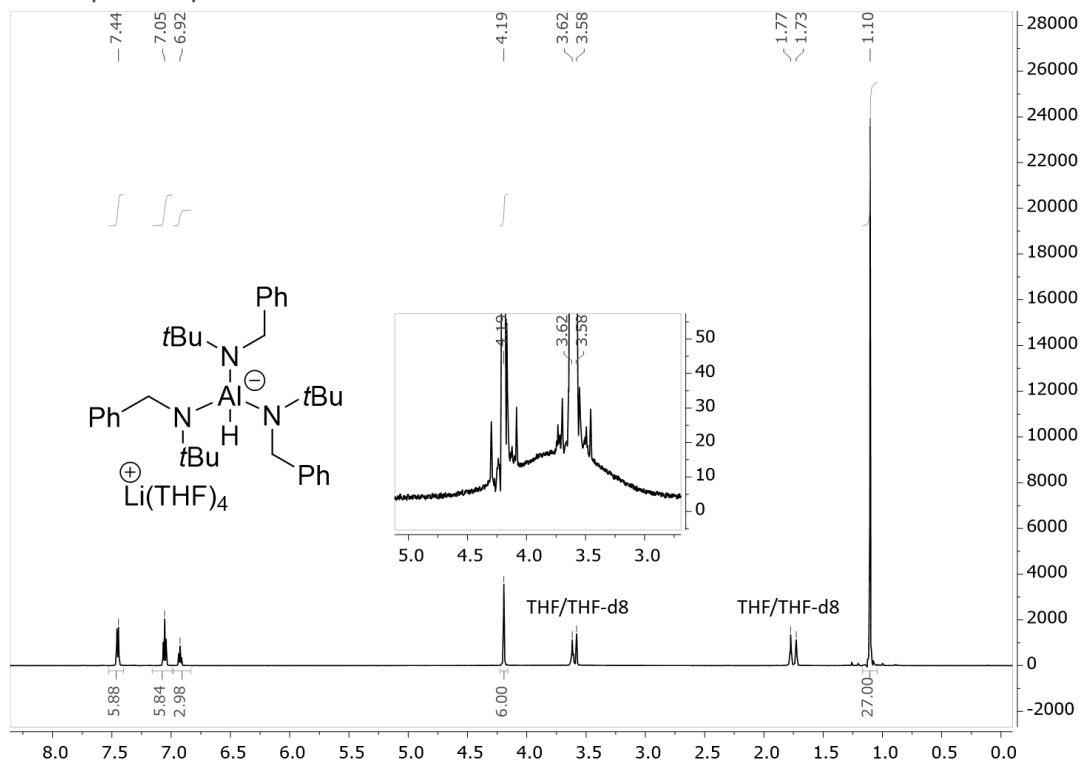

Figure S9:  $^1\text{H-NMR}$  of  $\text{LiAlH}[\text{N}(\text{tBu})\text{CH}_2\text{Ph}]_3 \cdot (\text{THF})_4$  (**1**). NMR in THF- $d_8$ .

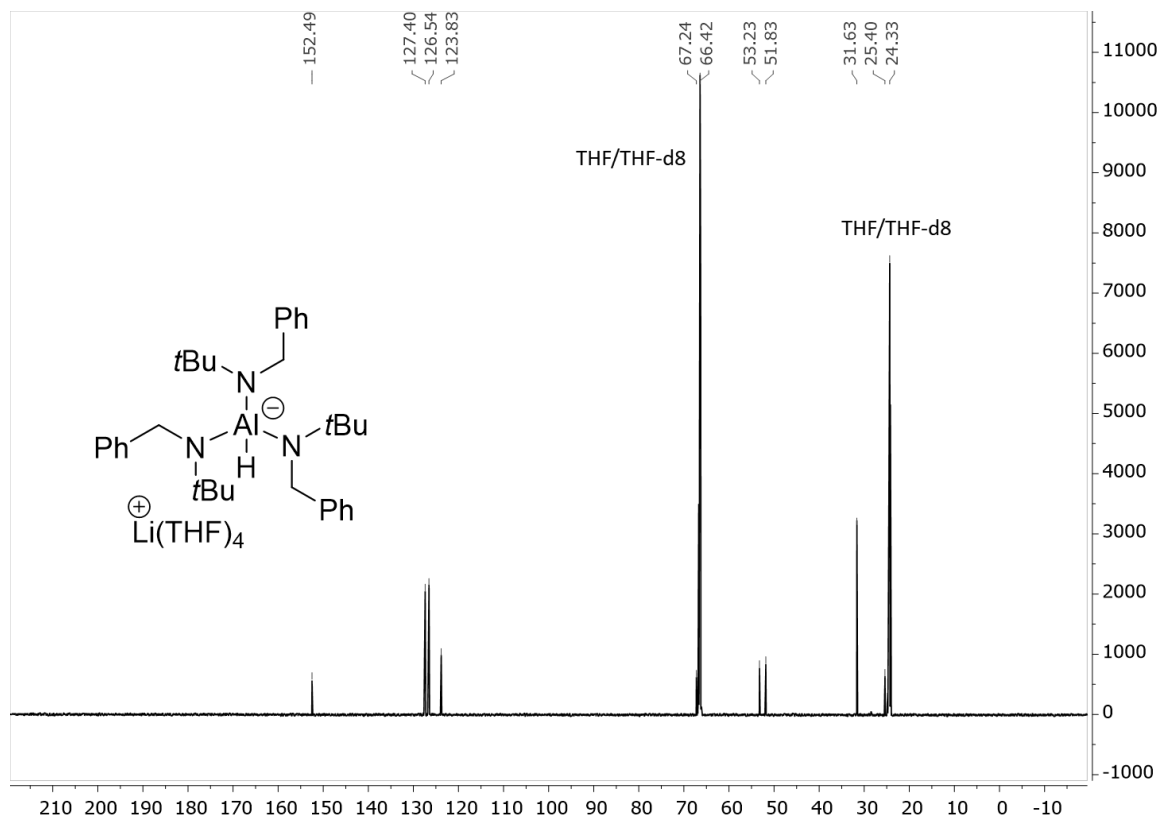

Figure S10:  $^{13}\text{C-NMR}$  of  $\text{LiAlH}[\text{N}(\text{tBu})\text{CH}_2\text{Ph}]_3 \cdot (\text{THF})_4$  (**1**). NMR in THF- $d_8$ .



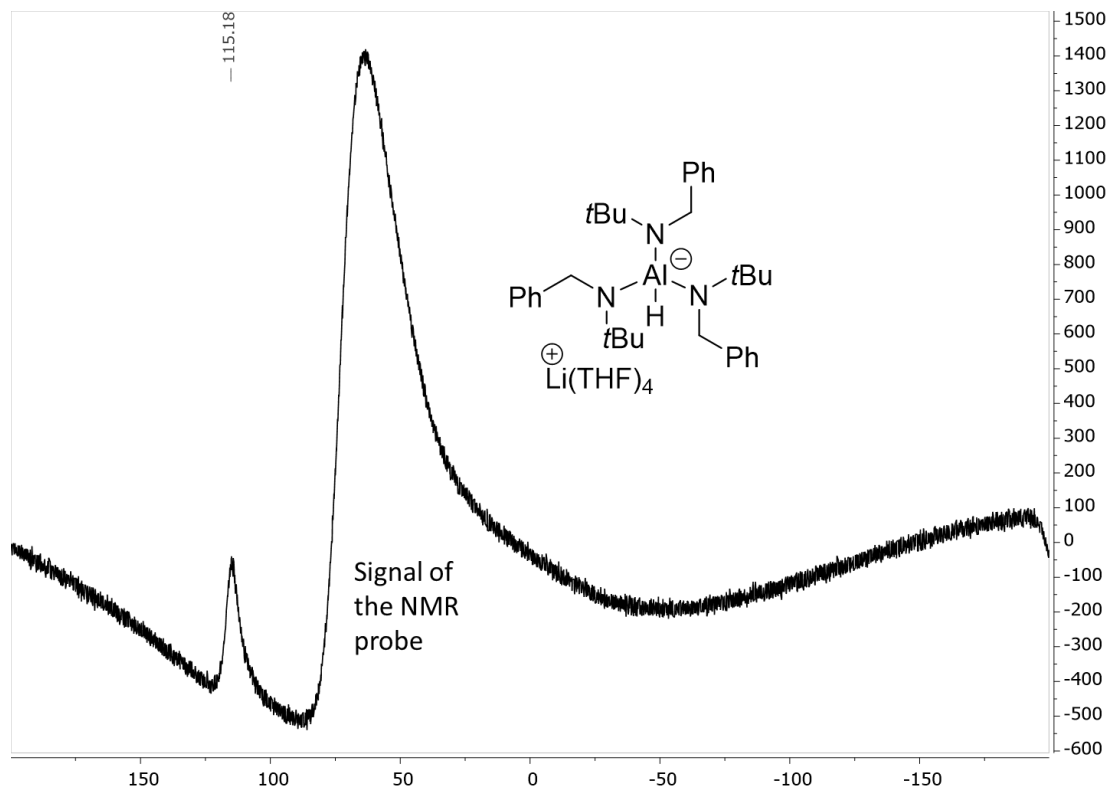

Figure S11:  $^{27}\text{Al}$ -NMR of  $\text{LiAlH}[\text{N}(\text{tBu})\text{CH}_2\text{Ph}]_3 \cdot (\text{THF})_4$  (**1**). NMR in  $\text{THF}-d_8$ .

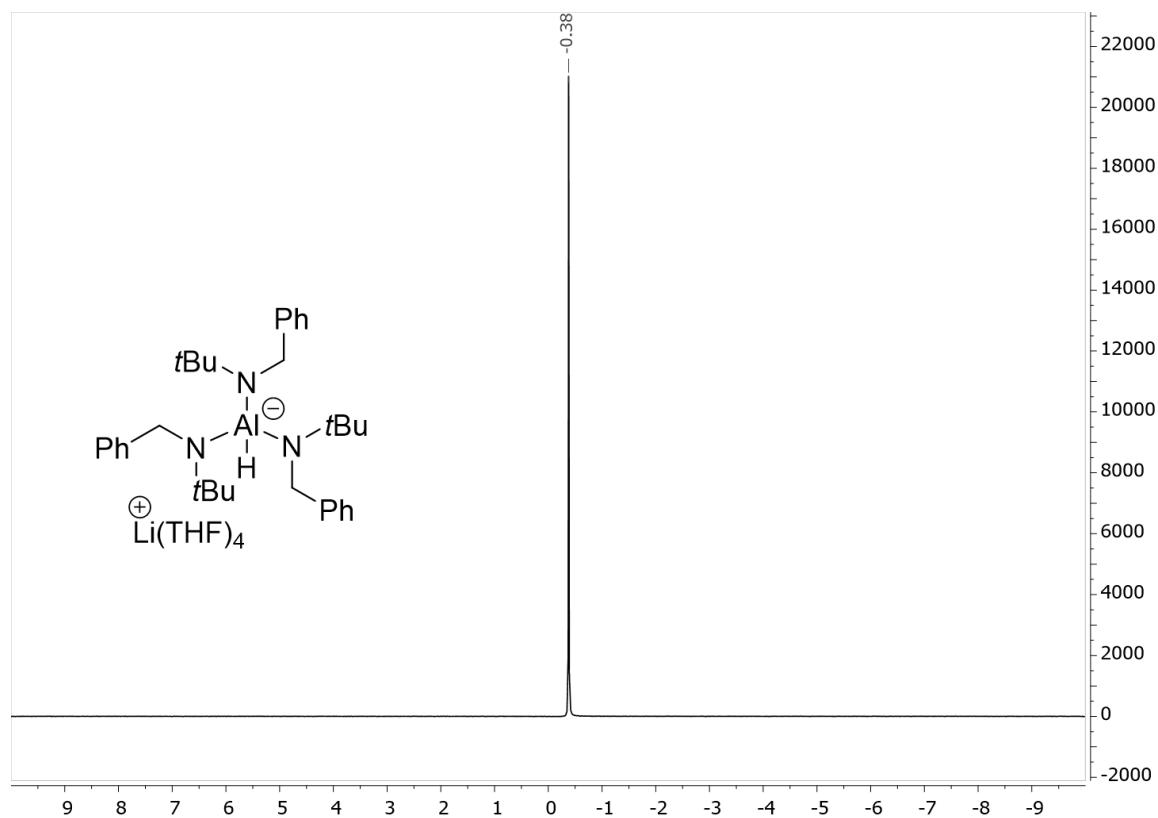

Figure S12:  $^7\text{Li}$ -NMR of  $\text{LiAlH}[\text{N}(\text{tBu})\text{CH}_2\text{Ph}]_3 \cdot (\text{THF})_4$  (**1**). NMR in  $\text{THF}-d_8$ .

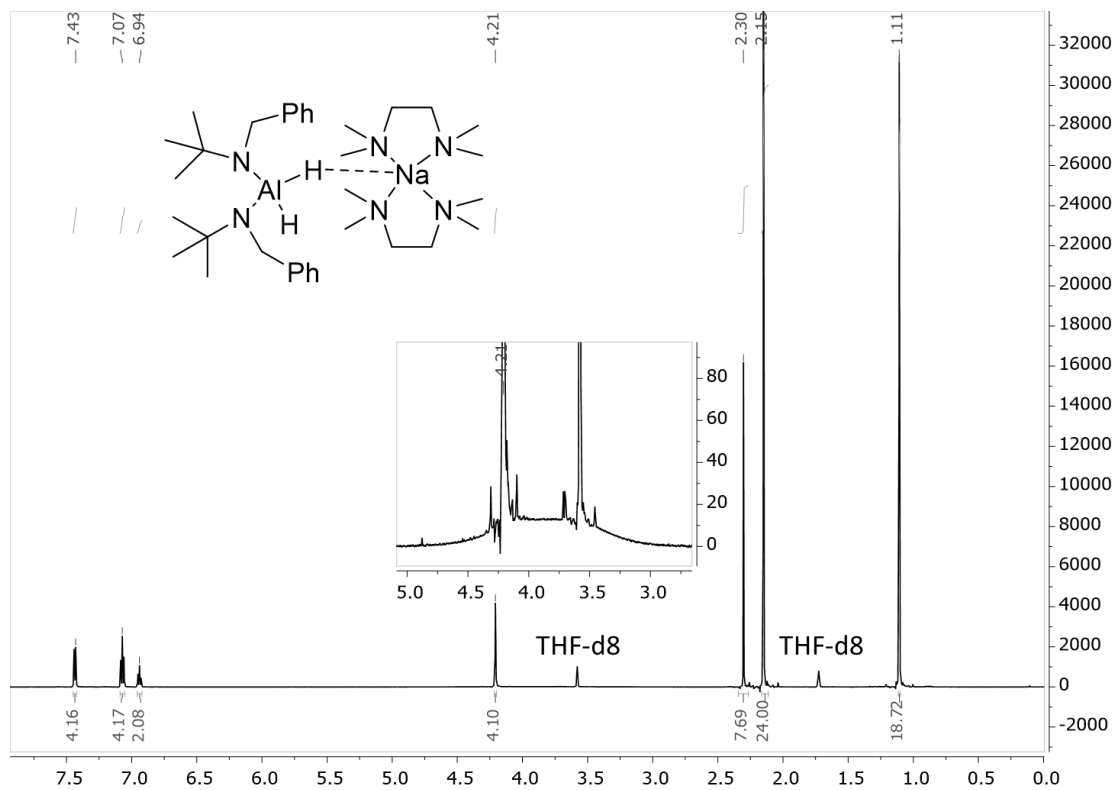

Figure S13:  $^1\text{H-NMR}$  of  $\text{NaAlH}_2[\text{N}(\text{tBu})\text{CH}_2\text{Ph}]_2 \cdot (\text{TMEDA})_2$  (**2**). NMR in  $\text{THF-d}_8$ .

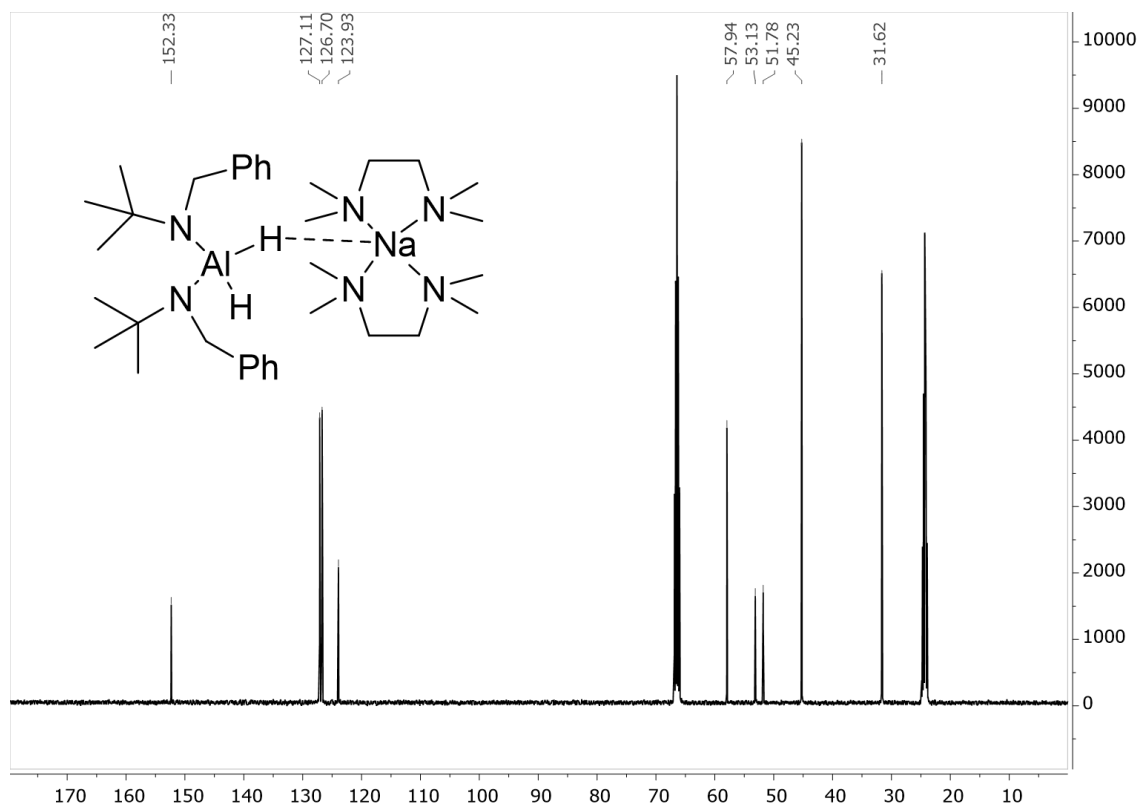

Figure S14:  $^{13}\text{C-NMR}$  of  $\text{NaAlH}_2[\text{N}(\text{tBu})\text{CH}_2\text{Ph}]_2 \cdot (\text{TMEDA})_2$  (**2**). NMR in  $\text{THF-d}_8$ .

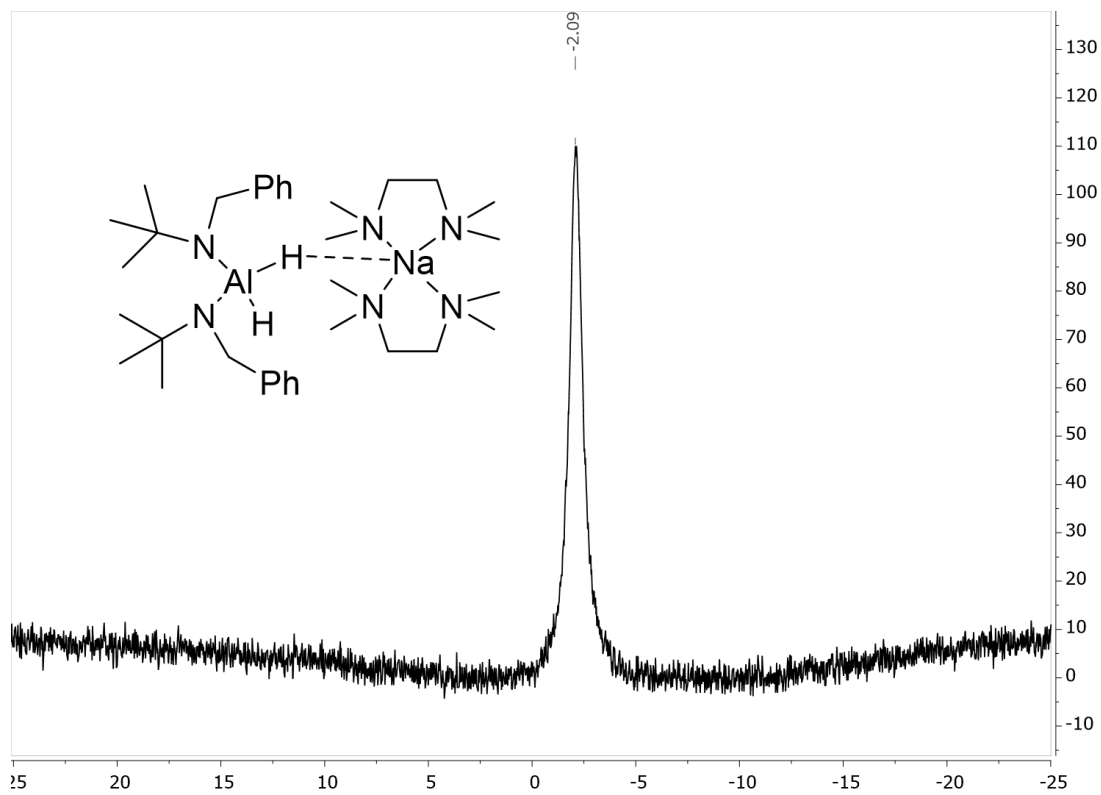

Figure S15:  $^{23}\text{Na}$ -NMR of  $\text{NaAlH}_2[\text{N}(\text{tBu})\text{CH}_2\text{Ph}]_2 \cdot (\text{TMEDA})_2$  (**2**). NMR in  $\text{THF-}d_8$ .

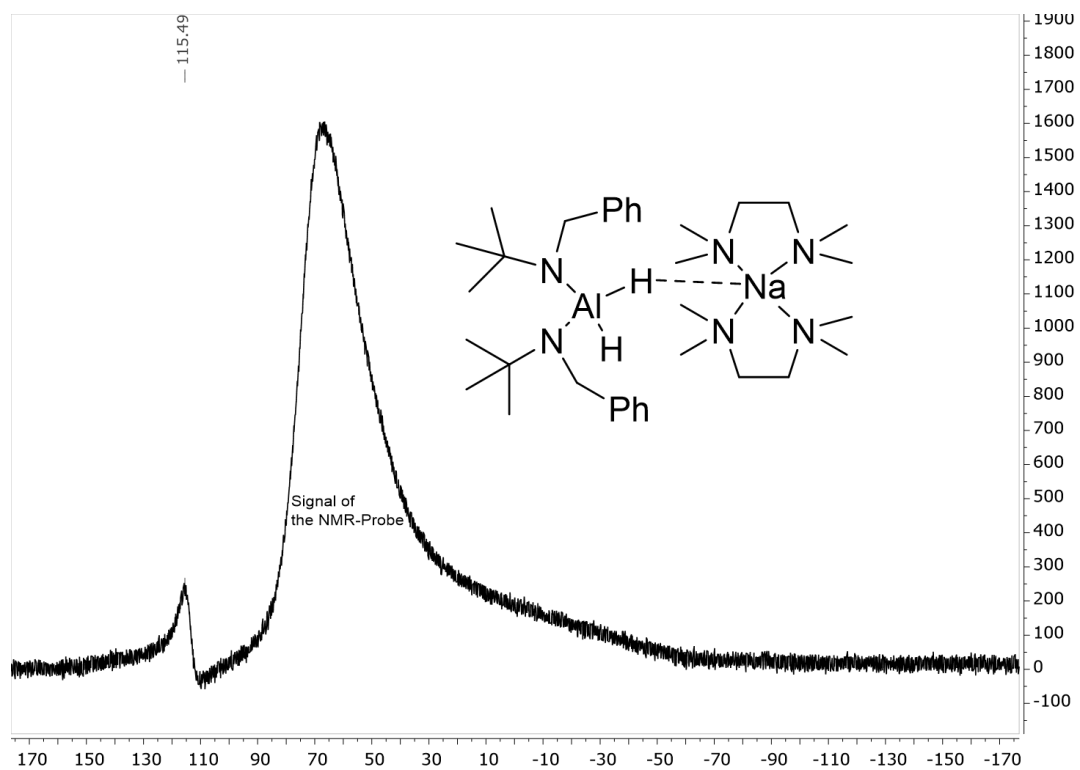

Figure S16:  $^{27}\text{Al}$ -NMR of  $\text{NaAlH}_2[\text{N}(\text{tBu})\text{CH}_2\text{Ph}]_2 \cdot (\text{TMEDA})_2$  (**2**). NMR in  $\text{THF-}d_8$ .

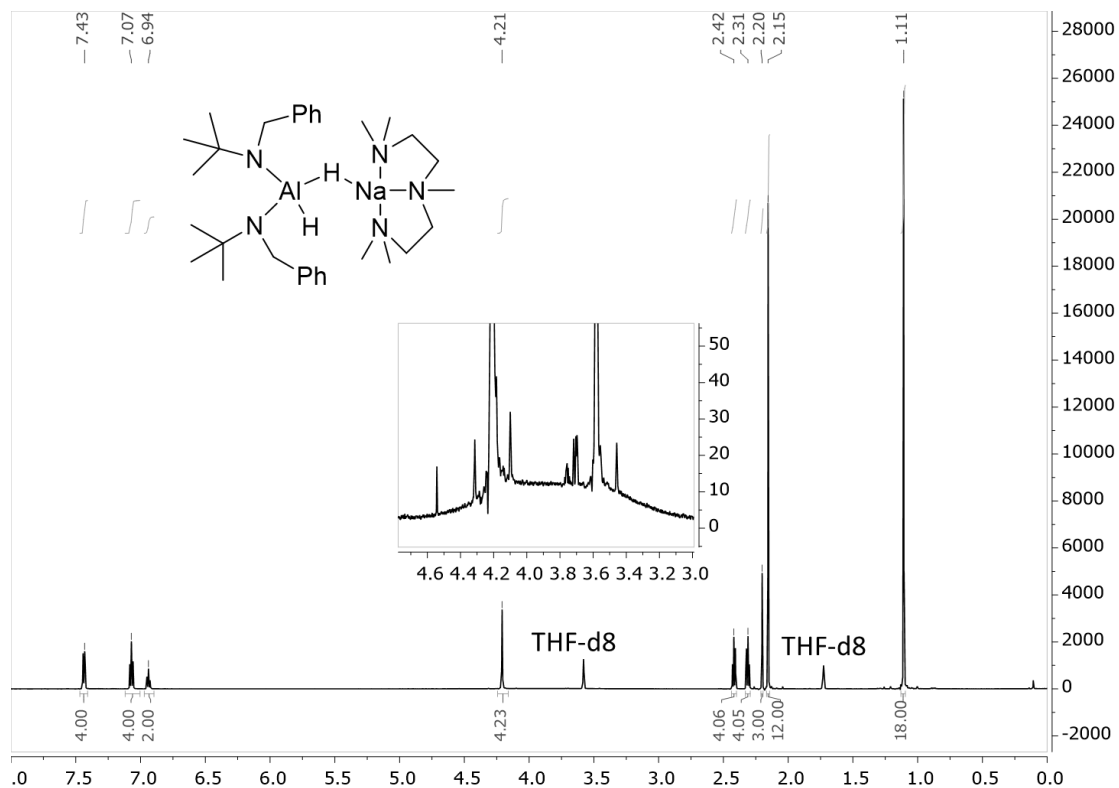

Figure S17:  $^1\text{H-NMR}$  of  $\text{NaAlH}_2[\text{N}(\text{tBu})\text{CH}_2\text{Ph}]_2\cdot\text{PMDTA}$  (**3**). NMR in  $\text{THF-d}_8$ .

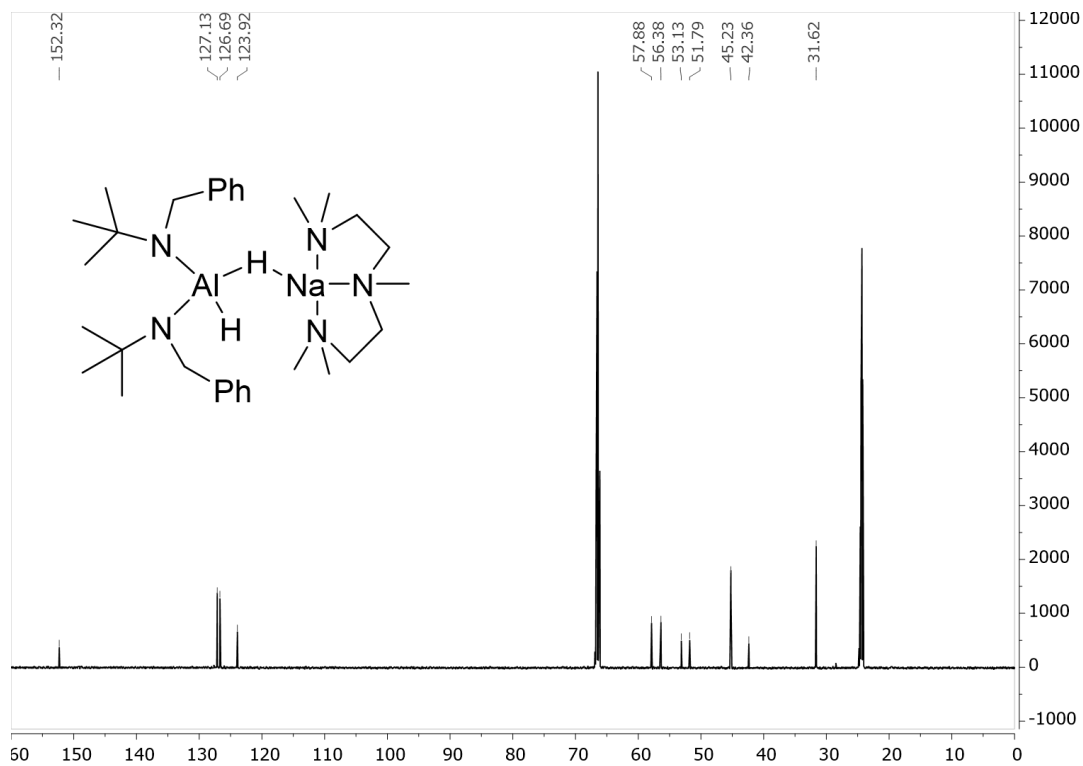

Figure S18:  $^{13}\text{C-NMR}$  of  $\text{NaAlH}_2[\text{N}(\text{tBu})\text{CH}_2\text{Ph}]_2\cdot\text{PMDTA}$  (**3**). NMR in  $\text{THF-d}_8$ .

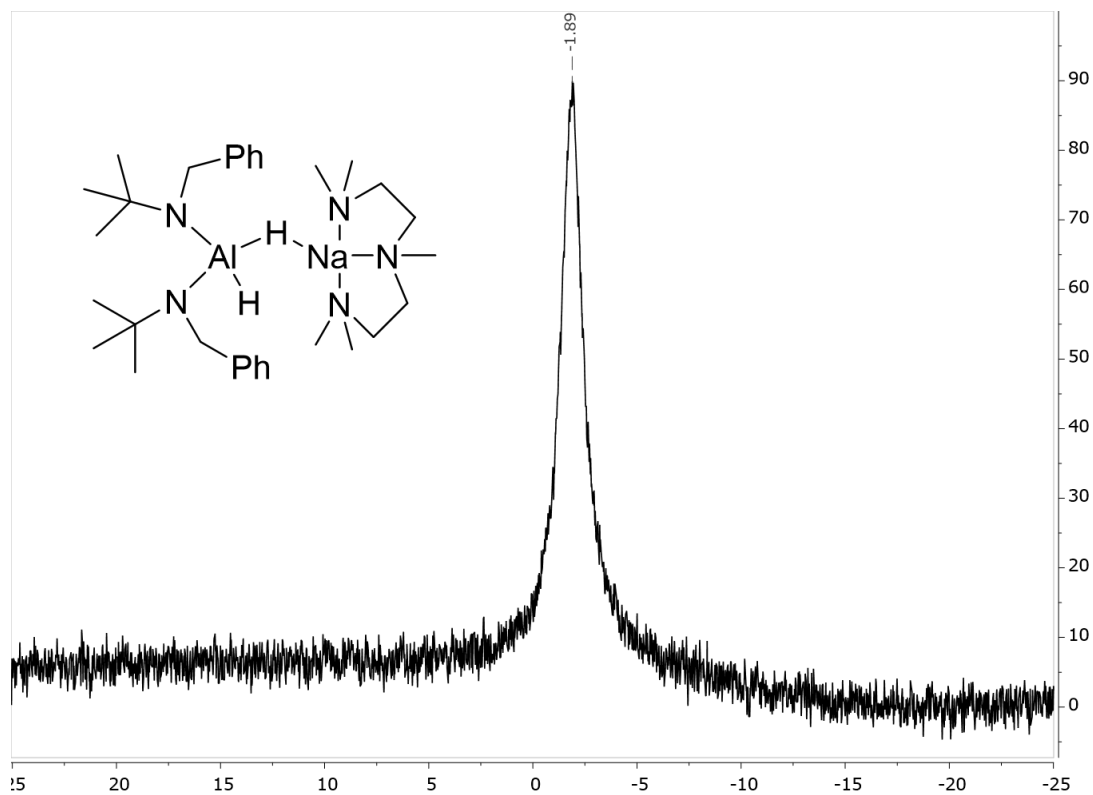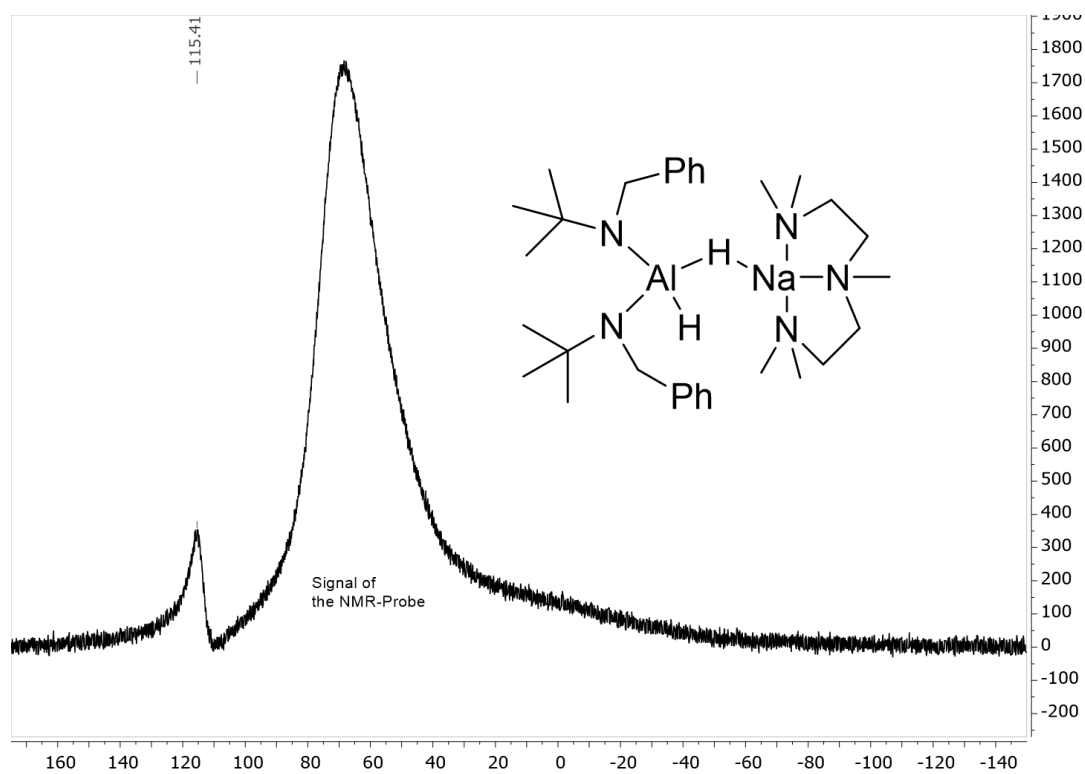

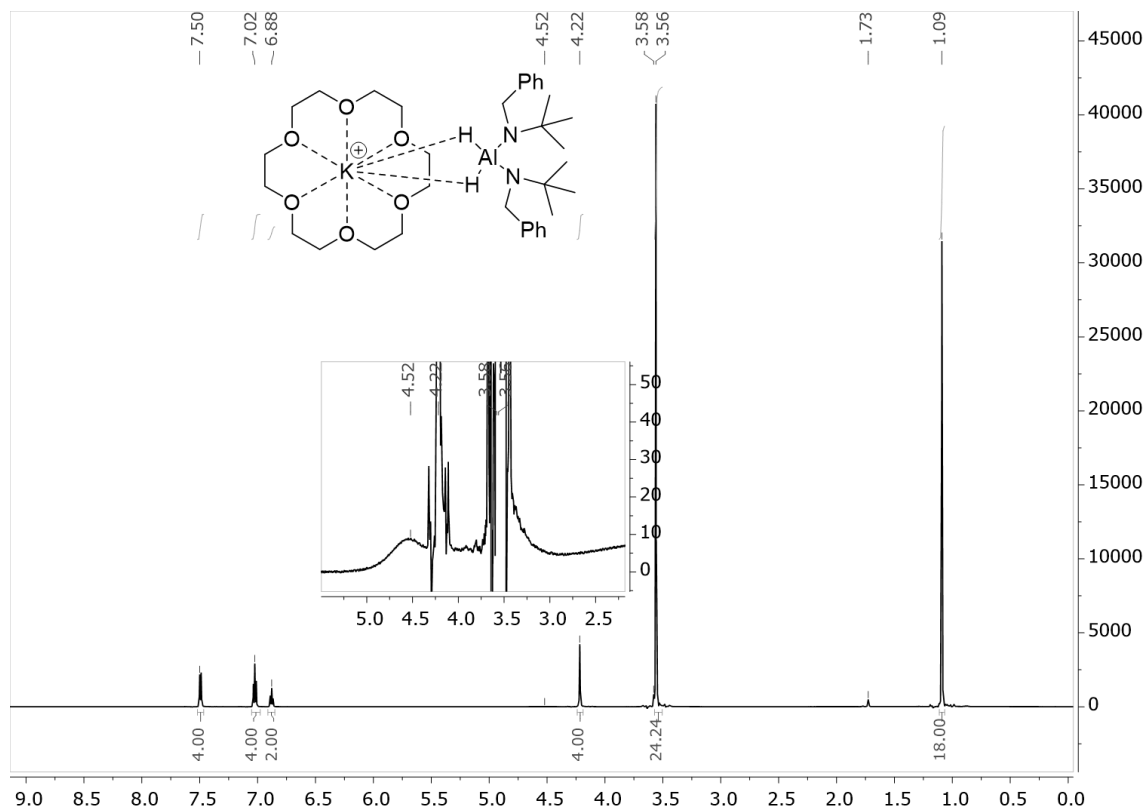

Figure S21:  $^1\text{H}$ -NMR of  $\text{KAlH}_2[\text{N}(\text{tBu})\text{CH}_2\text{Ph}]_2 \cdot 18\text{-crown-6}$  (**4**). NMR in  $\text{THF-}d_8$ .

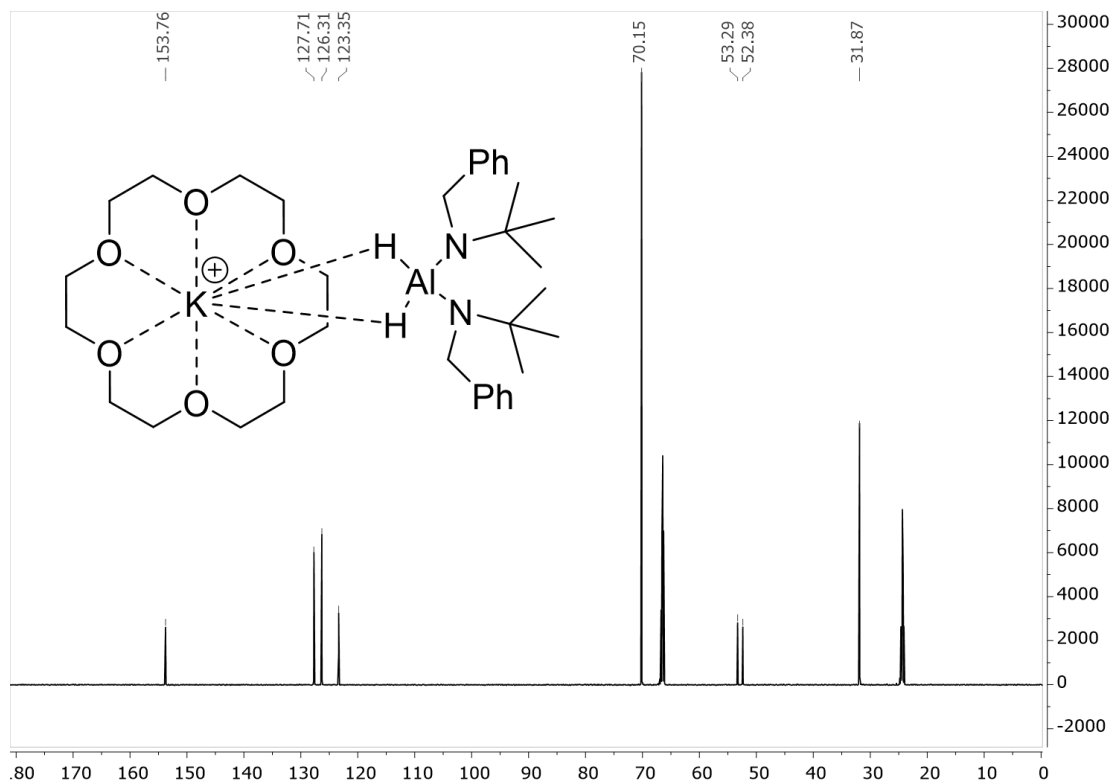

Figure S22:  $^{13}\text{C}$ -NMR of  $\text{KAlH}_2[\text{N}(\text{tBu})\text{CH}_2\text{Ph}]_2 \cdot 18\text{-crown-6}$  (**4**). NMR in  $\text{THF-}d_8$ .

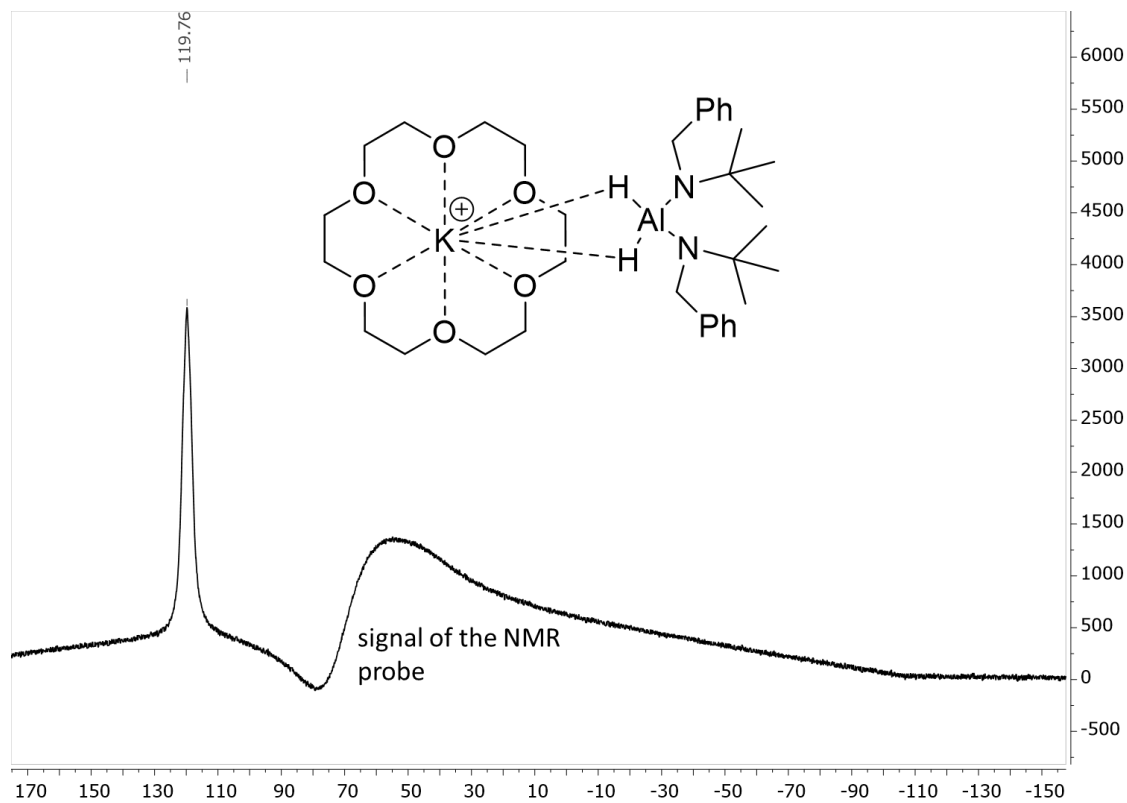

Figure S23:  $^{27}\text{Al}$ -NMR of  $\text{KAlH}_2[\text{N}(\text{tBu})\text{CH}_2\text{Ph}]_2 \cdot 18\text{-crown-6}$  (**4**). NMR in  $\text{THF-}d_8$ .

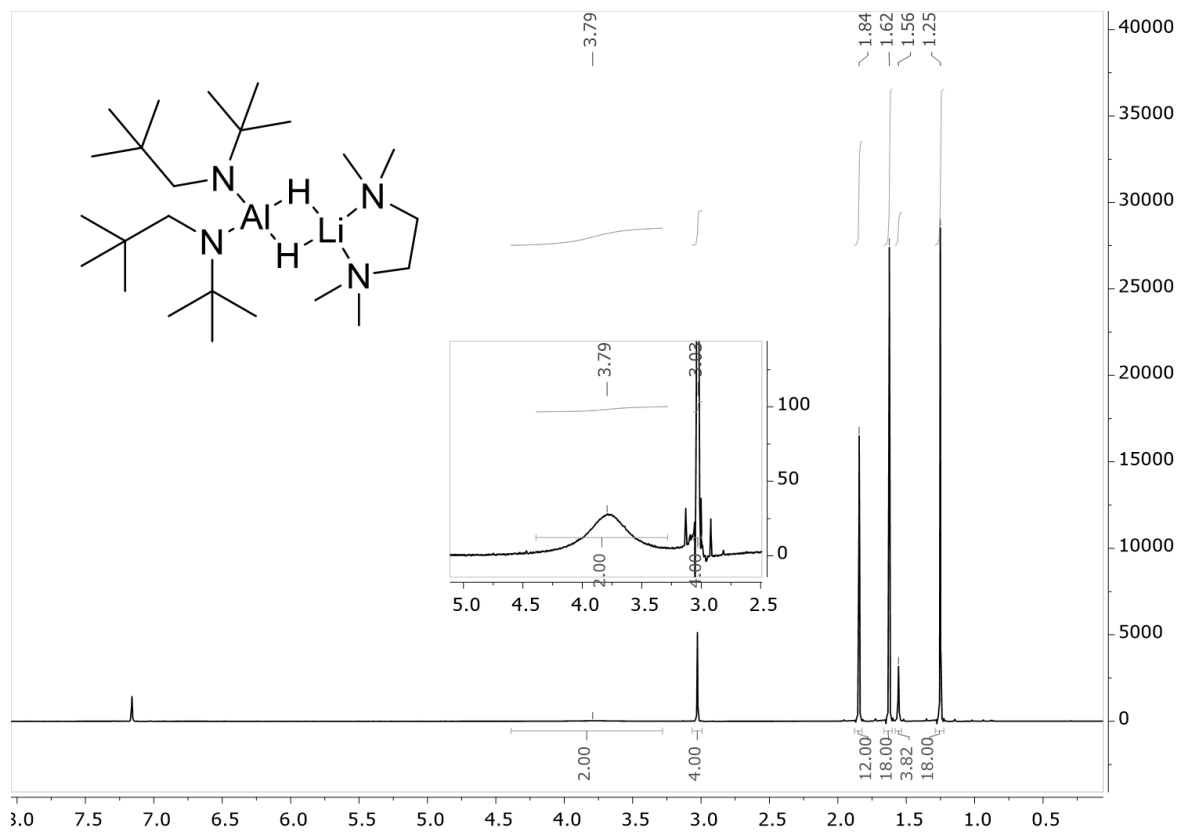

Fig. S24:  $^1\text{H}$ -NMR of  $\text{LiAlH}_2[\text{N}(\text{tBu})\text{CH}_2\text{tBu}]_2 \cdot (\text{TMEDA})$  (**5**). NMR in  $\text{C}_6\text{D}_6$ .

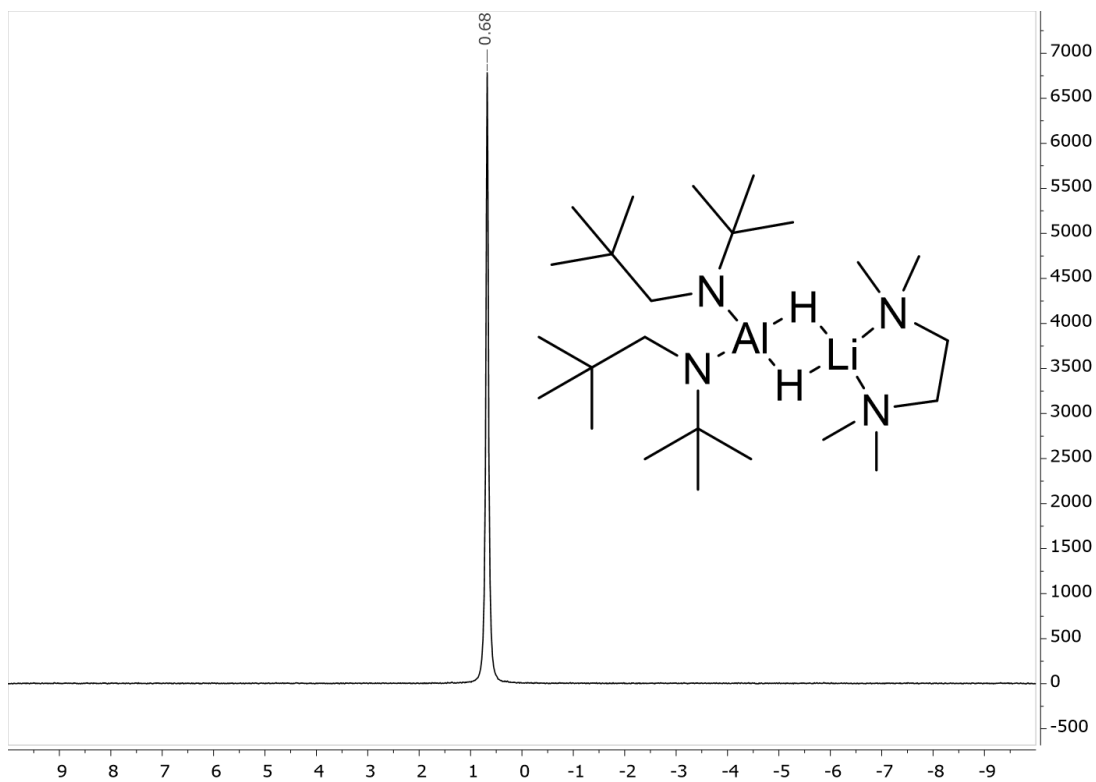

Fig. S25:  $^7\text{Li}$ -NMR of  $\text{LiAlH}_2[\text{N}(\text{tBu})\text{CH}_2\text{tBu}]_2 \cdot (\text{TMEDA})$  (5). NMR in  $\text{C}_6\text{D}_6$ .

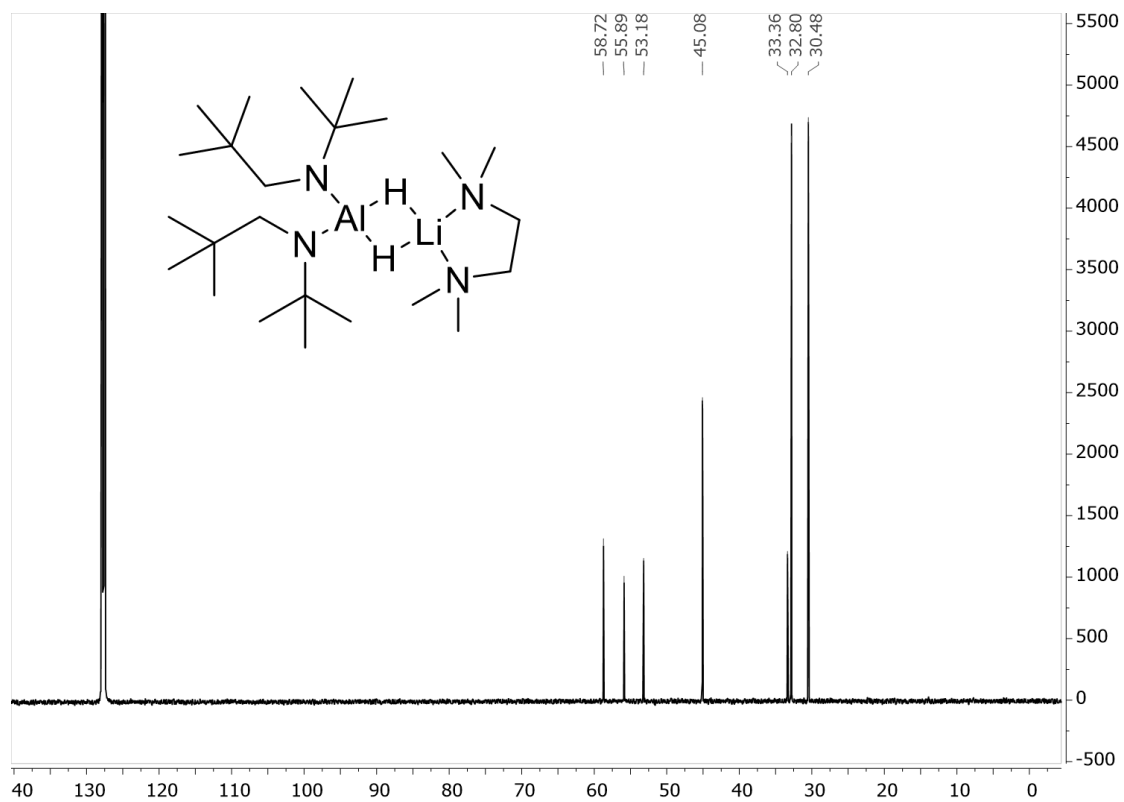

Fig. S26:  $^{13}\text{C}$ -NMR of  $\text{LiAlH}_2[\text{N}(\text{tBu})\text{CH}_2\text{tBu}]_2 \cdot (\text{TMEDA})$  (5). NMR in  $\text{C}_6\text{D}_6$ .



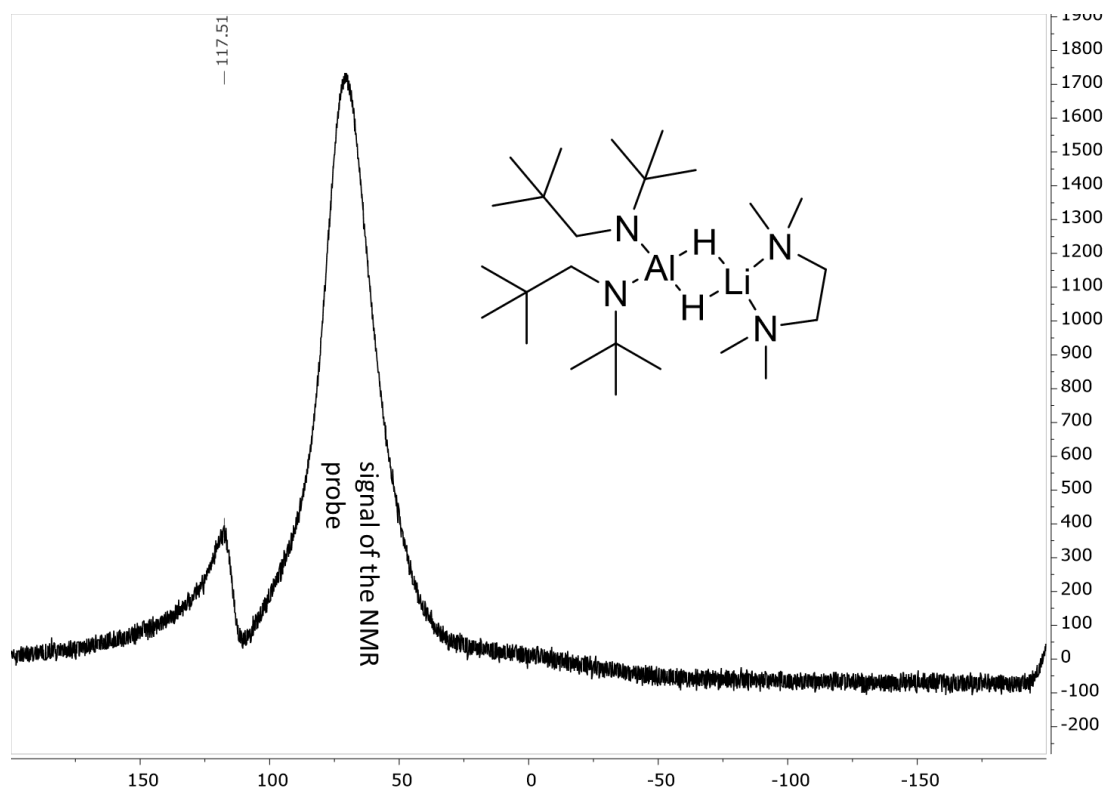

Fig. S27:  $^{27}\text{Al}$ -NMR of  $\text{LiAlH}_2[\text{N}(\text{tBu})\text{CH}_2\text{tBu}]_2 \cdot (\text{TMEDA})$  (5). NMR in  $\text{C}_6\text{D}_6$ .

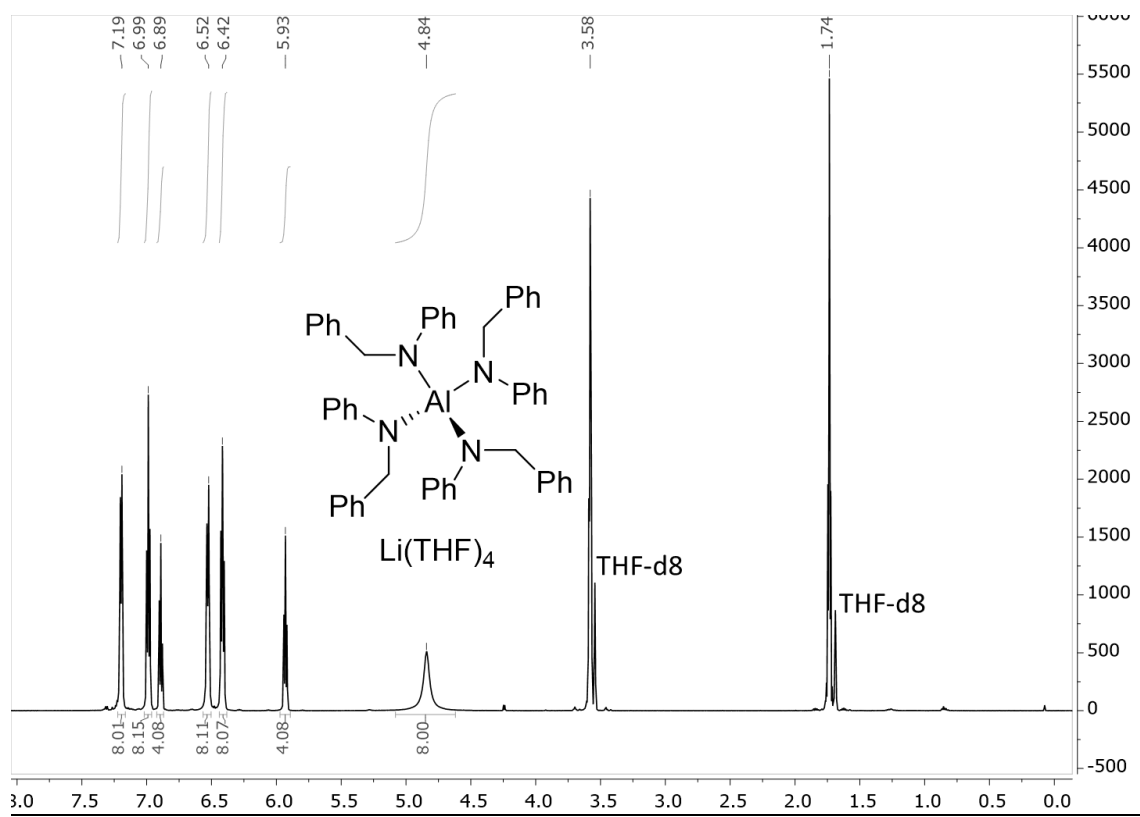

Figure S28:  $^1\text{H}$ -NMR of  $\text{LiAl}[\text{N}(\text{Ph})\text{CH}_2\text{Ph}]_4 \cdot (\text{THF})_4$  (6). NMR in  $\text{THF}-d_8$ .

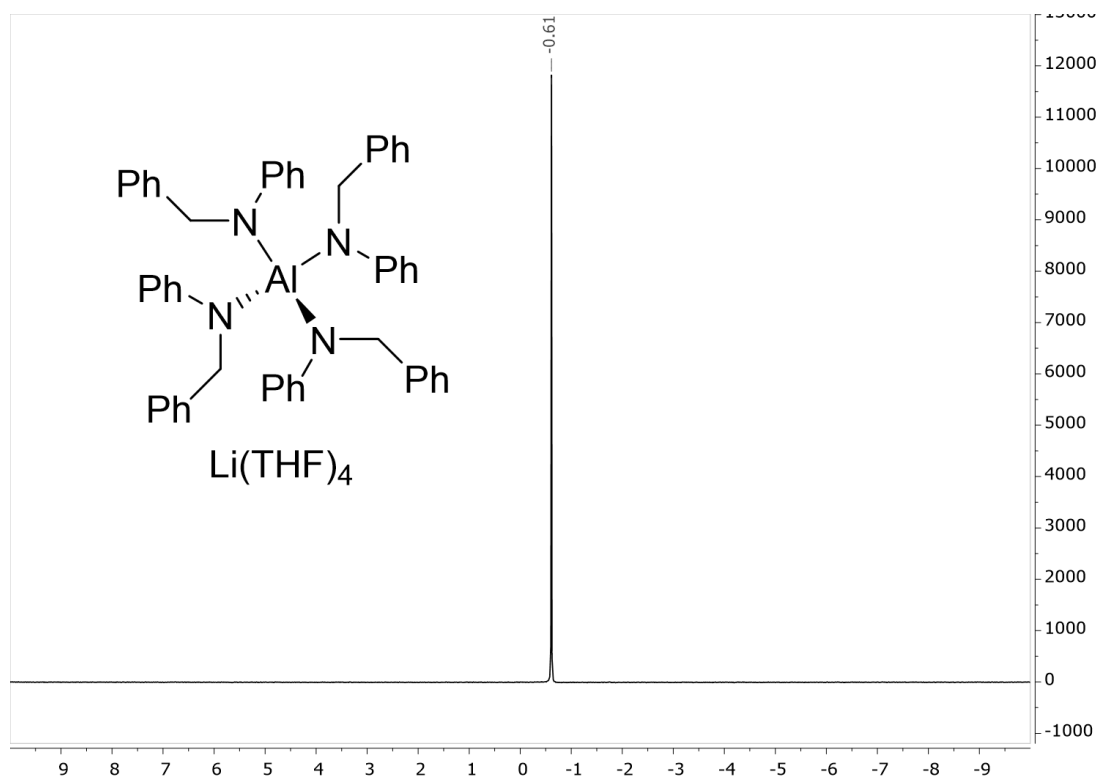

Figure S29:  $^7\text{Li}$ -NMR of  $\text{LiAl}[\text{N}(\text{Ph})\text{CH}_2\text{Ph}]_4 \cdot (\text{THF})_4$  (**6**). NMR in  $\text{THF}-d_8$ .

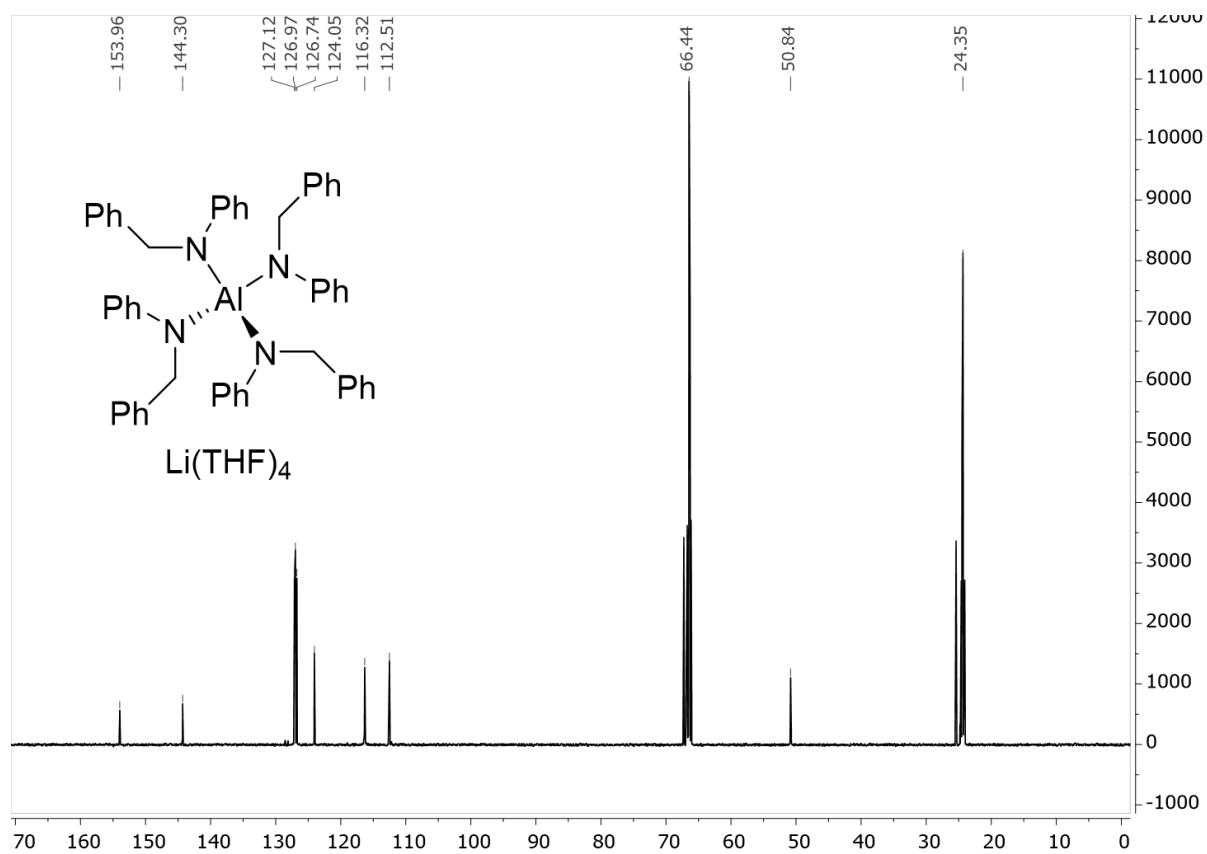

Figure S30:  $^{13}\text{C}$ -NMR of  $\text{LiAl}[\text{N}(\text{Ph})\text{CH}_2\text{Ph}]_4 \cdot (\text{THF})_4$  (**6**). NMR in  $\text{THF}-d_8$ .

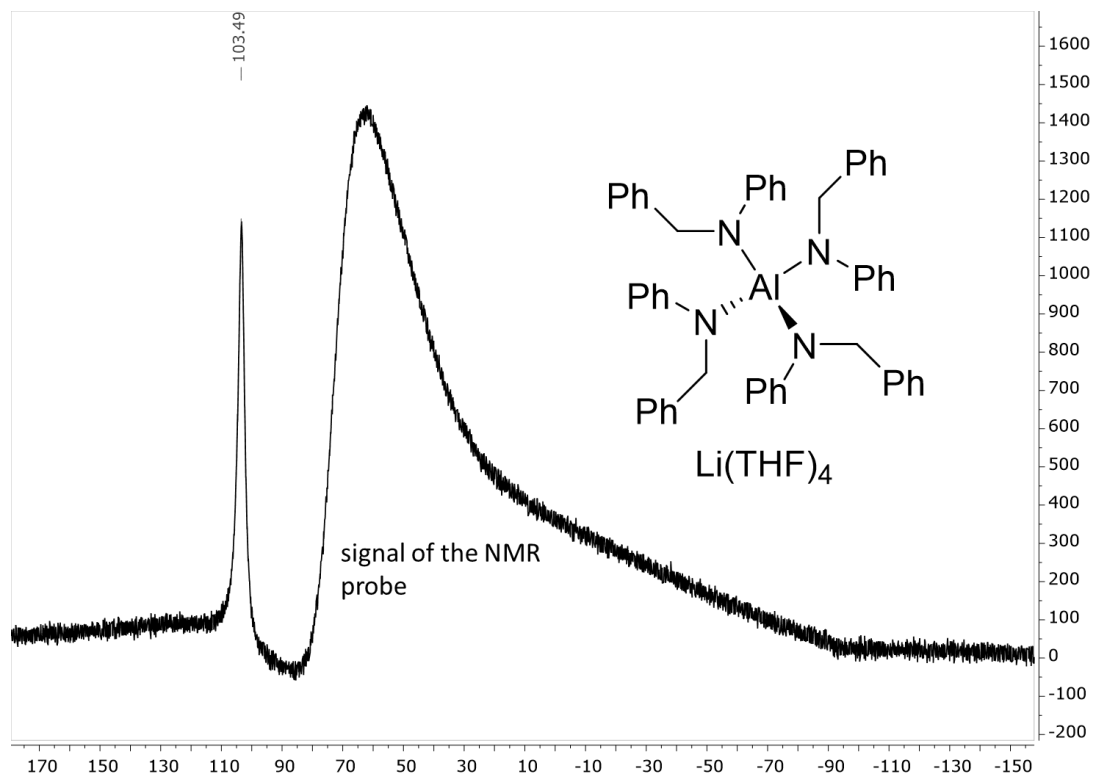

Figure S31:  $^{27}\text{Al}$ -NMR of  $\text{LiAl}[\text{N}(\text{Ph})\text{CH}_2\text{Ph}]_4 \cdot (\text{THF})_4$  (**6**). NMR in  $\text{THF}-d_8$ .

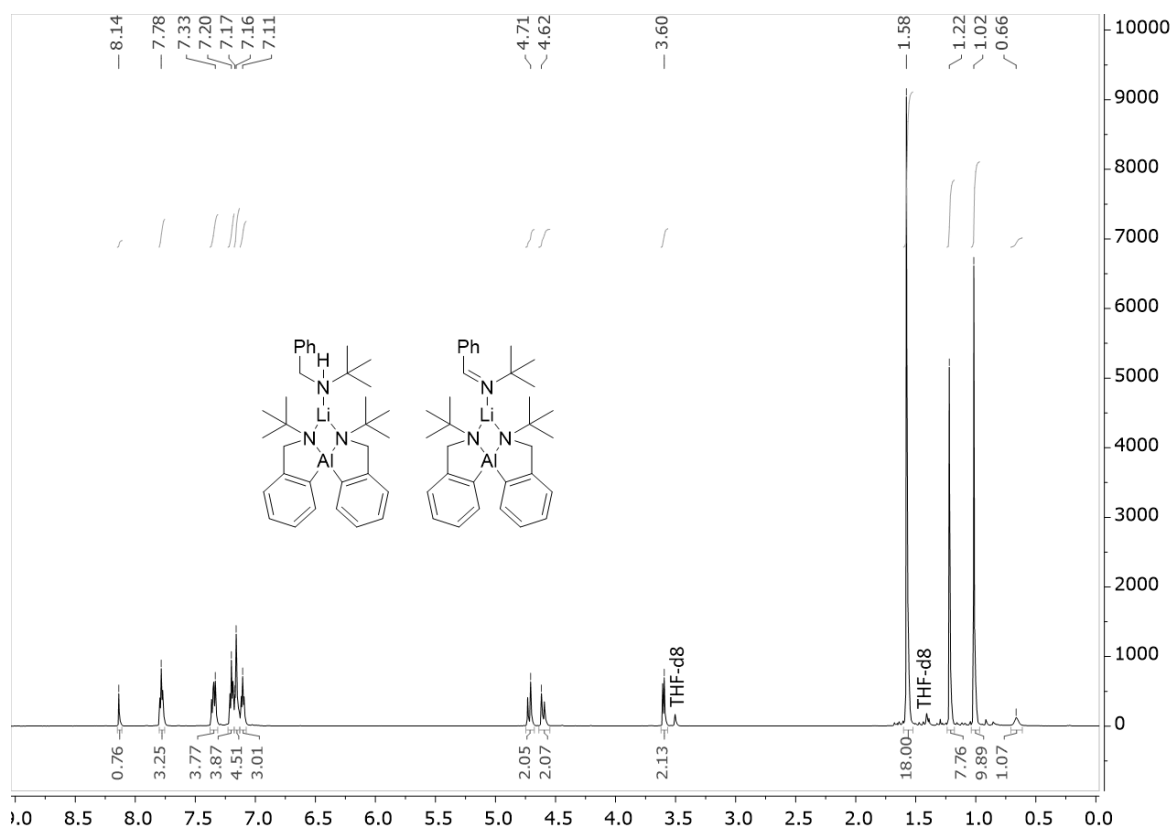

Figure S32:  $^1\text{H}$ -NMR of complex **7**. NMR in  $\text{C}_6\text{D}_6/\text{THF}-d_8$  5/1.

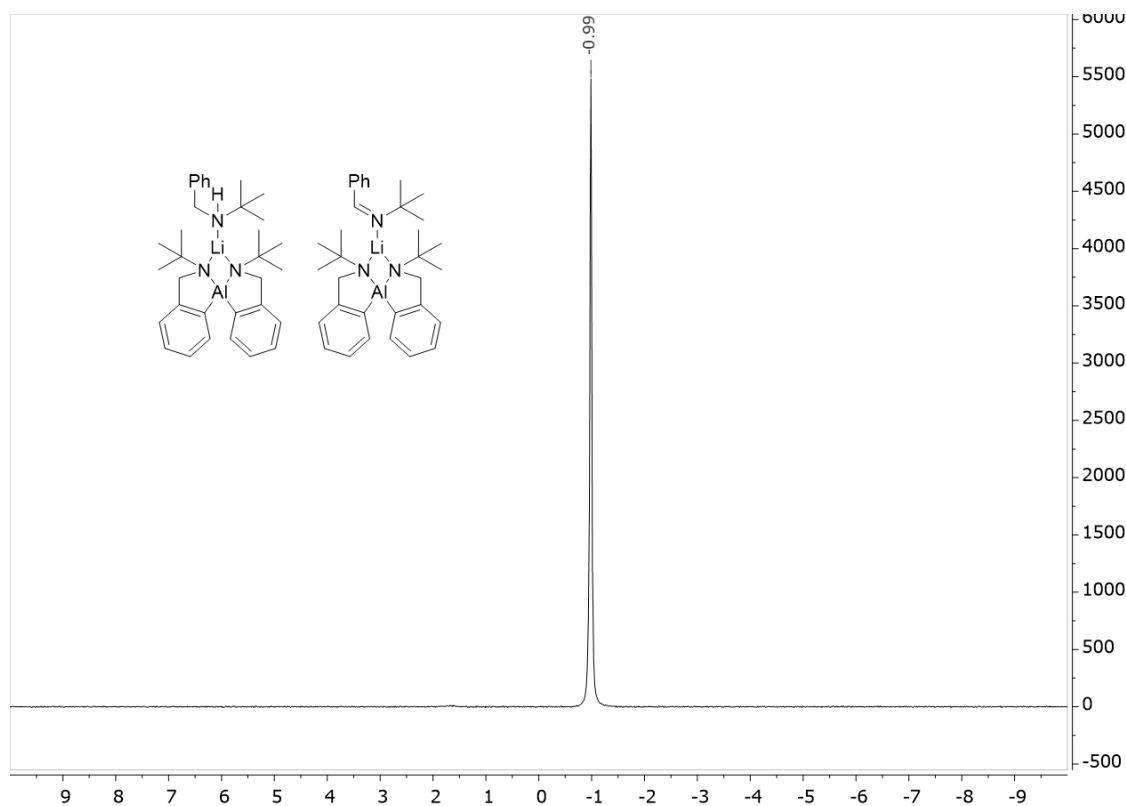

Figure S33:  $^7\text{Li}$ -NMR of **7**. NMR in  $\text{C}_6\text{D}_6/\text{THF-}d_8$  5/1.

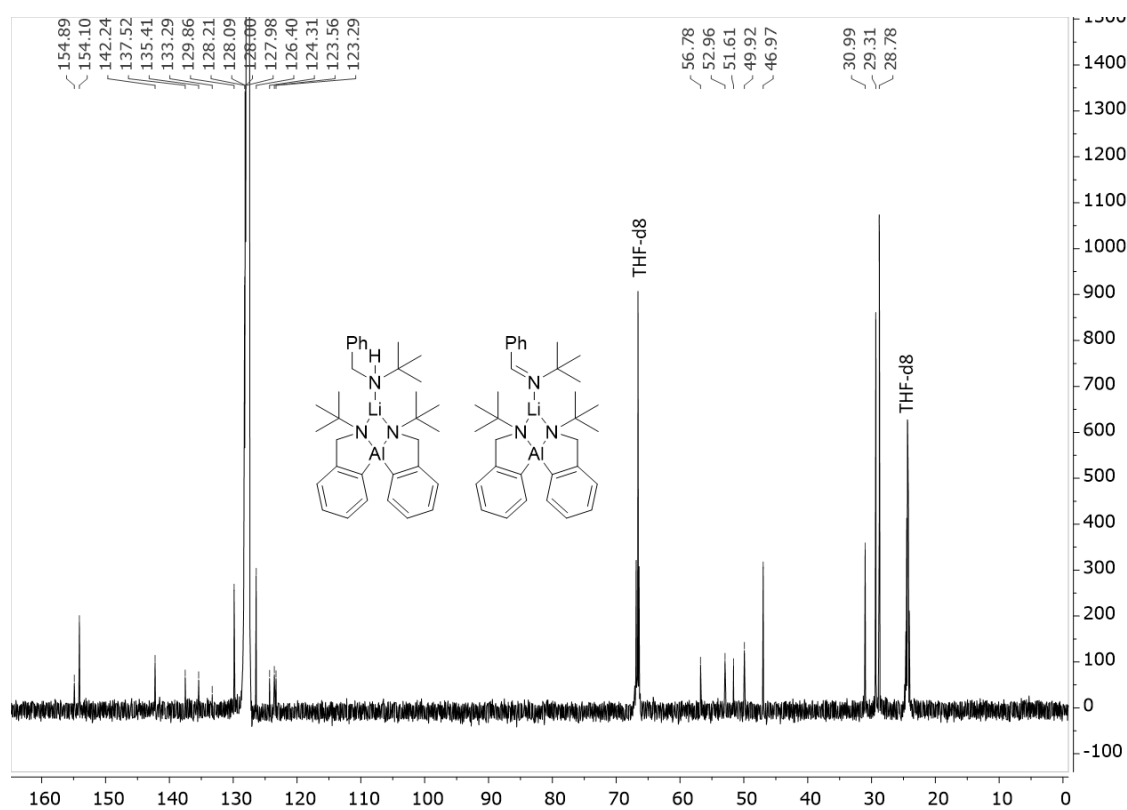

Figure S34:  $^{13}\text{C}$ -NMR of **7**. NMR in  $\text{C}_6\text{D}_6/\text{THF-}d_8$  5/1.

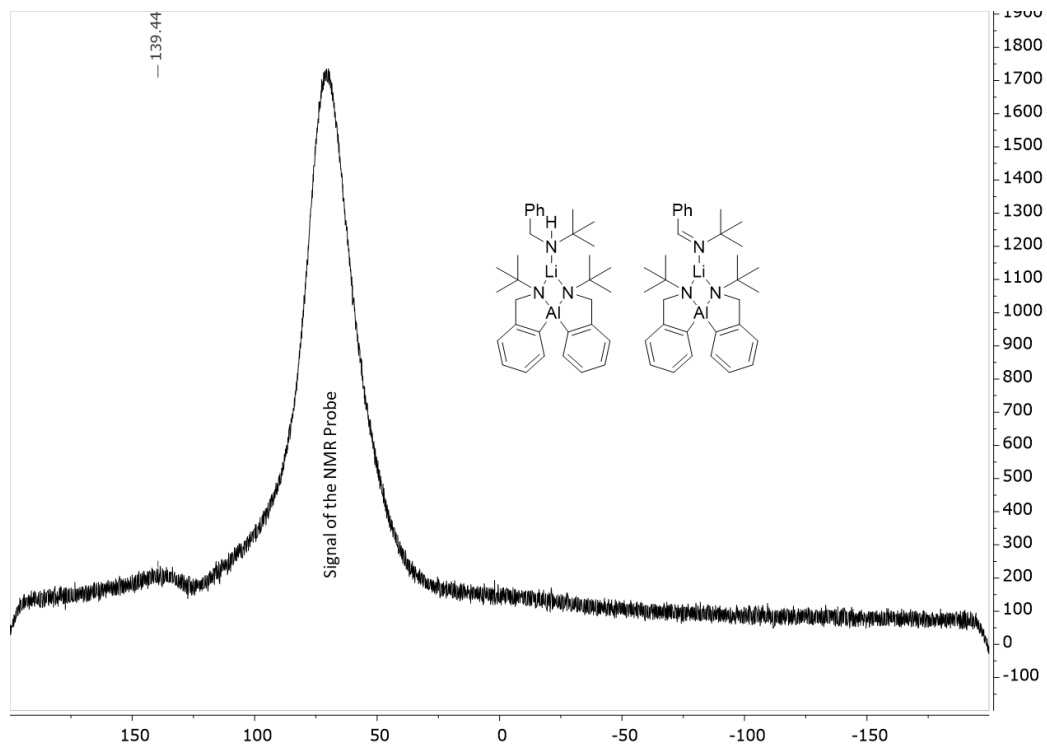

Figure S35:  $^{27}\text{Al}$ -NMR of **7**. NMR in  $\text{C}_6\text{D}_6/\text{THF-}d_8$  5/1.

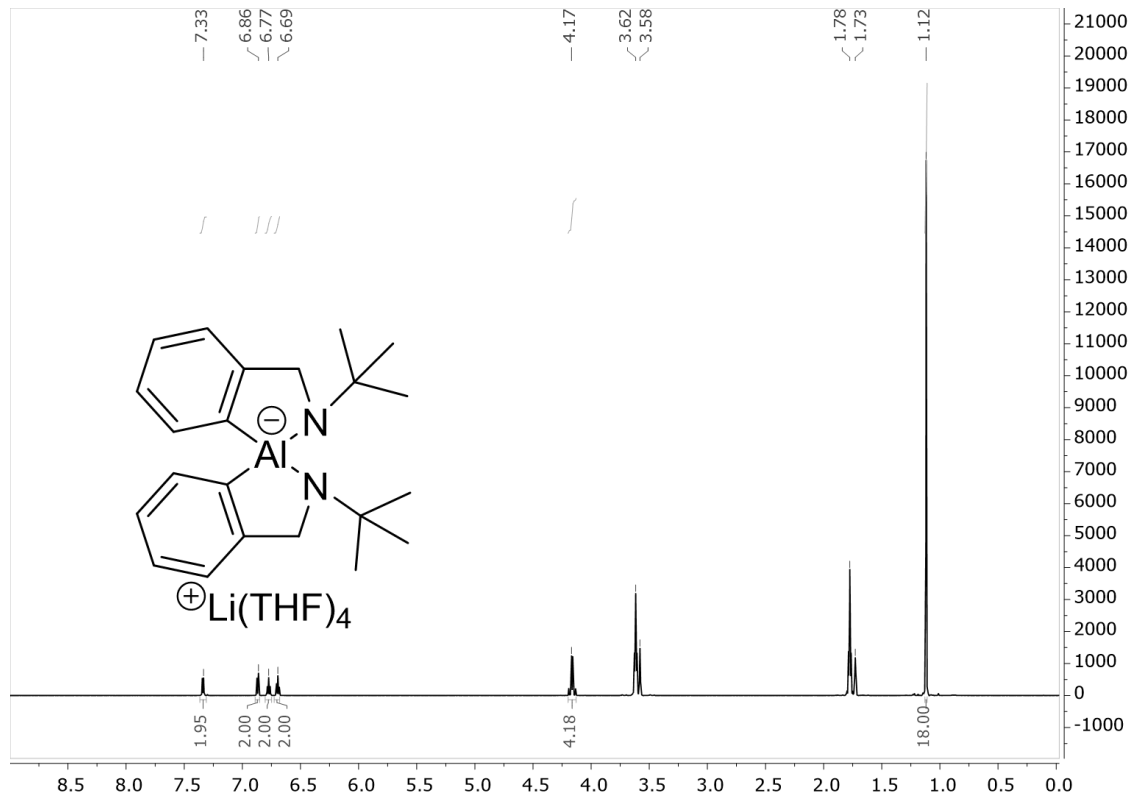

Figure S36:  $^1\text{H}$ -NMR of complex **8**. NMR in  $\text{THF-}d_8$ .

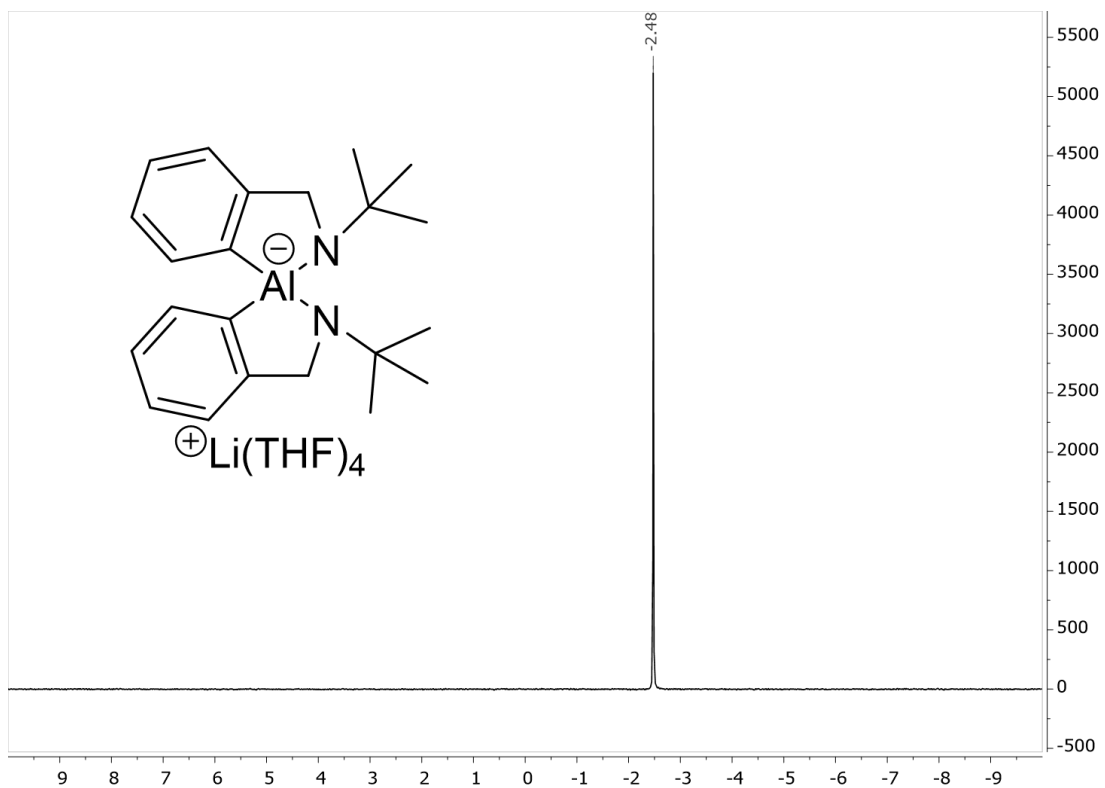

Figure S37:  ${}^7\text{Li}$ -NMR of complex **8**. NMR in  $\text{THF-}d_8$ .

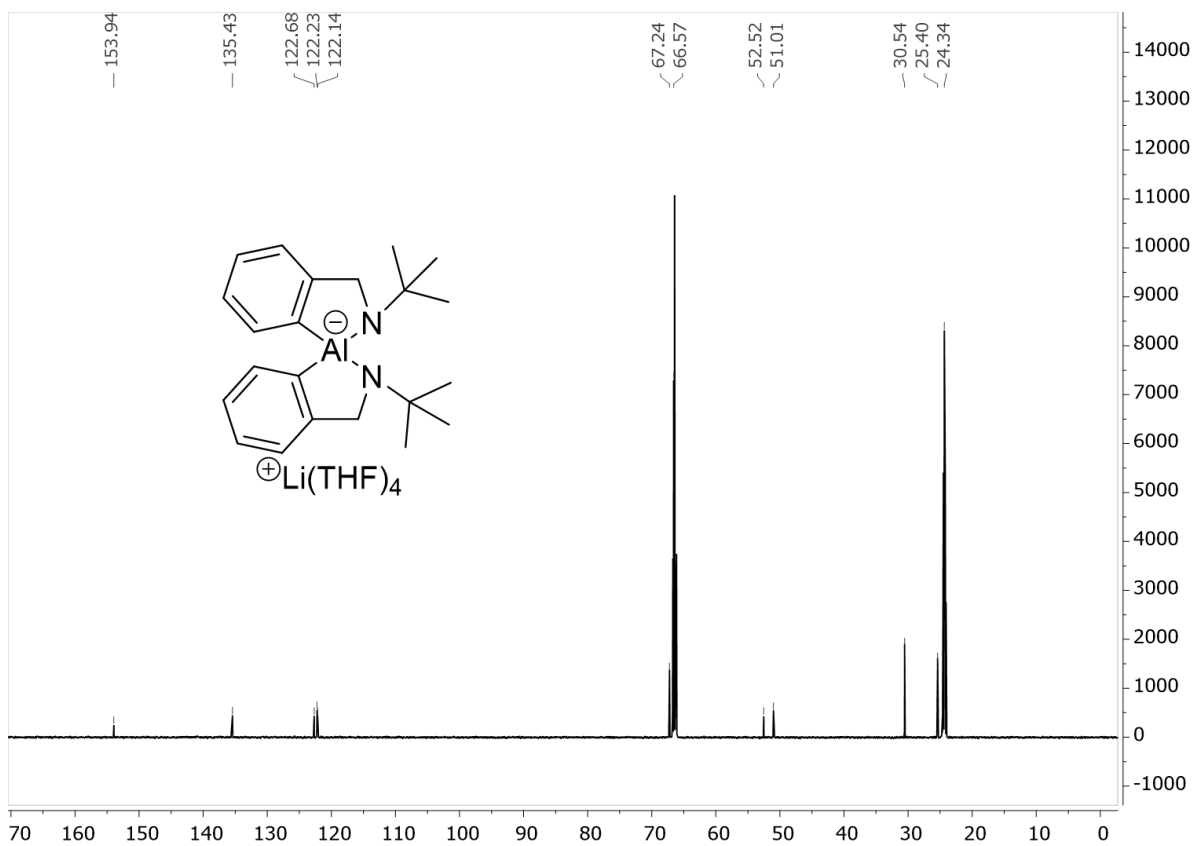

Figure S38:  ${}^{13}\text{C}$ -NMR of complex **8**. NMR in  $\text{THF-}d_8$ .

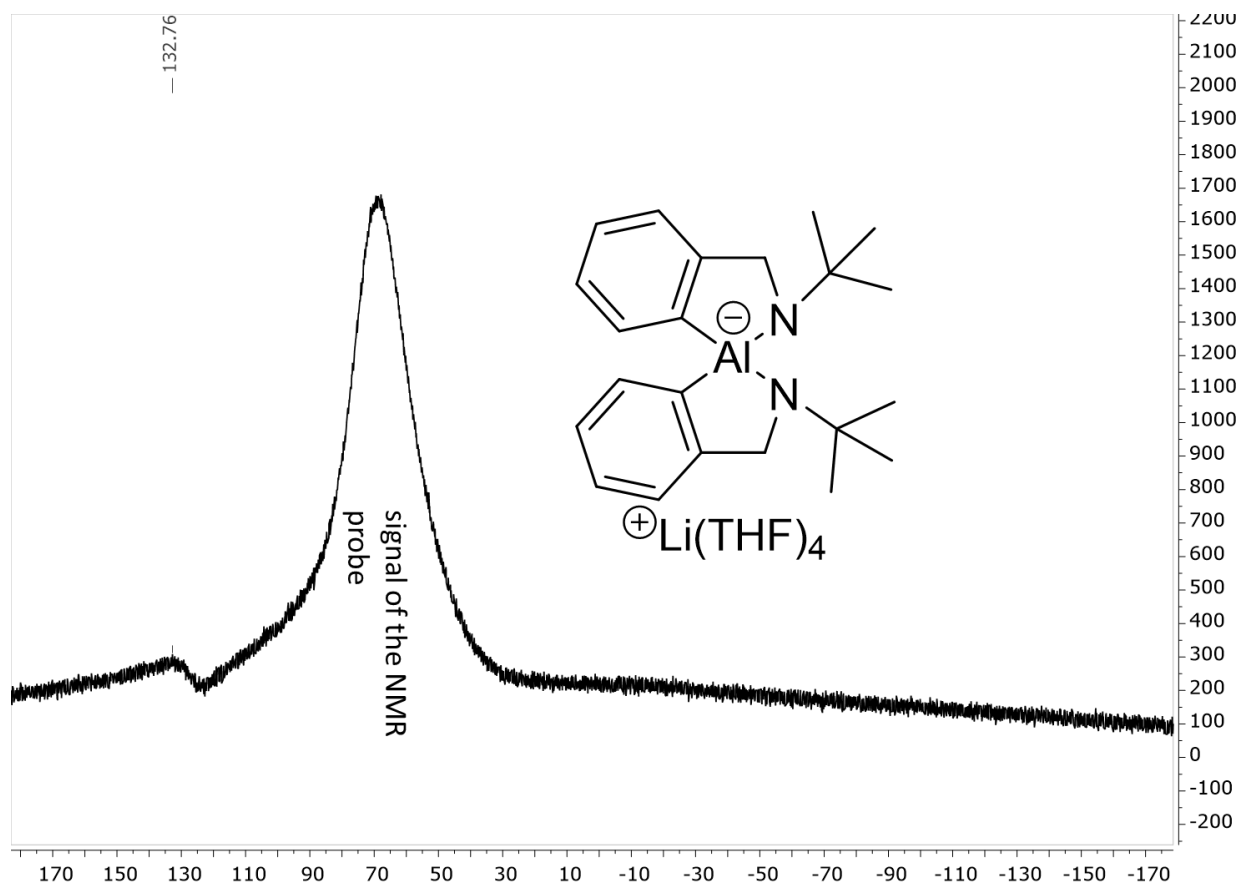

Figure S39:  $^{27}\text{Al}$ -NMR of complex **8**. NMR in  $\text{THF-}d_8$ .

## Crystal Structures

### Structure determination of $\text{LiAlH}[\text{N}(\text{tBu})\text{CH}_2\text{Ph}]_3 \cdot (\text{THF})_4$ (**1**)

A colorless crystal of  $\text{LiAlH}[\text{N}(\text{tBu})\text{CH}_2\text{Ph}]_3 \cdot (\text{THF})_4$  was embedded in inert perfluoropolyalkylether (viscosity 1800 cSt; ABCR GmbH) and mounted using a Hampton Research CryoLoop. The crystal was then flash cooled to 100.0(1) K in a nitrogen gas stream and kept at this temperature during the experiment. The crystal structure was measured on a SuperNova diffractometer with Atlas S2 detector using a  $\text{CuK}\alpha$  microfocus source. The measured data was processed with the CrysAlisPro (v40.67a) software package.<sup>[S9]</sup> Using Olex2,<sup>[S5]</sup> the structure was solved with the ShelXT<sup>[S6]</sup> structure solution program using Intrinsic Phasing and refined with the ShelXL<sup>[S7]</sup> refinement package using Least Squares Minimization. Most hydrogen atoms were placed in ideal positions and refined as riding atoms with relative isotropic displacement parameters. The metal bound hydride was observed from difference Fourier maps and refined.

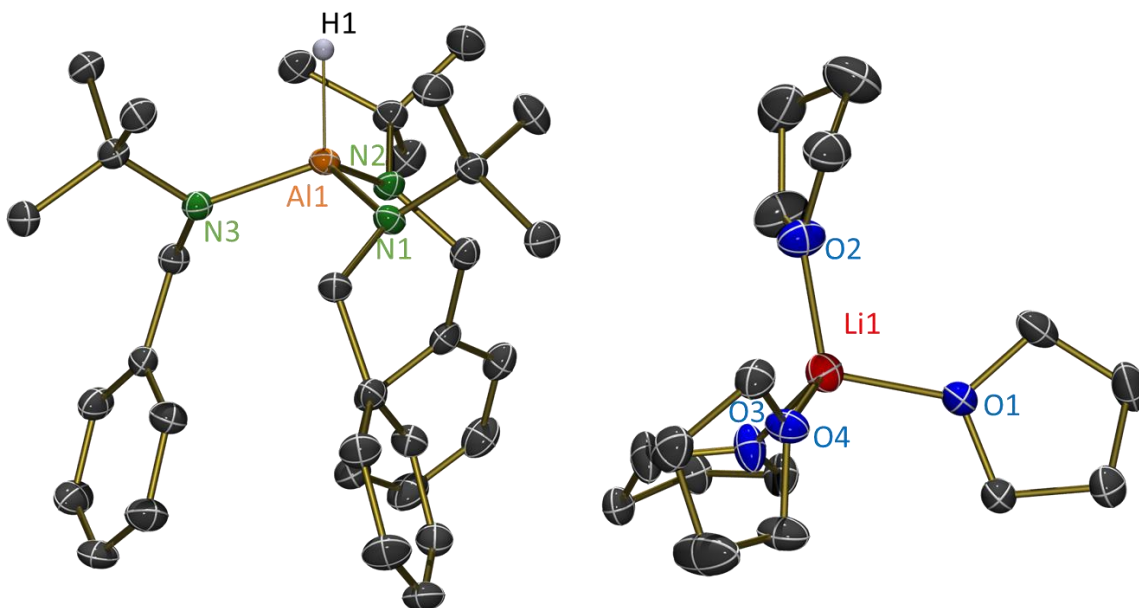

Figure S40: ORTEP-plot (50% probability) of  $\text{LiAlH}[\text{N}(\text{tBu})\text{CH}_2\text{Ph}]_3 \cdot (\text{THF})_4$  (**1**). H atoms except for the one bound to Al are omitted for clarity.



### Structure determination of $\text{NaAlH}_2[\text{N}(\text{tBu})\text{CH}_2\text{Ph}]_2 \cdot (\text{TMEDA})_2$ (**2**)

A colorless crystal of compound **1** was embedded in inert perfluoropolyalkylether (viscosity 1800 cSt; ABCR GmbH) and mounted using a Hampton Research CryoLoop. The crystal was then flash cooled to 100.00(11) K in a nitrogen gas stream and kept at this temperature during the experiment. The crystal structure was measured on a SuperNova diffractometer with Atlas S2 detector using a  $\text{CuK}\alpha$  microfocus source. The measured data was processed with the CrysAlisPro (v40.53) software package.<sup>[S4]</sup> Using Olex2<sup>[S5]</sup>, the structure was solved with the ShelXT<sup>[S6]</sup> structure solution program using Intrinsic Phasing and refined with the ShelXL<sup>[S7]</sup> refinement package using Least Squares minimization. All non-hydrogen atoms were refined anisotropically. Most hydrogen atoms were placed in ideal positions and refined as riding atoms with relative isotropic displacement parameters. The positions of the aluminum bound hydrides were observed from difference Fourier maps and refined.

Disorder of one TMEDA ligand was observed and was modeled with the help of a rigid bond restraint (RIGU)<sup>[S8]</sup>. The relative occupancies of the two alternative orientations were refined to 0.39/0.61.

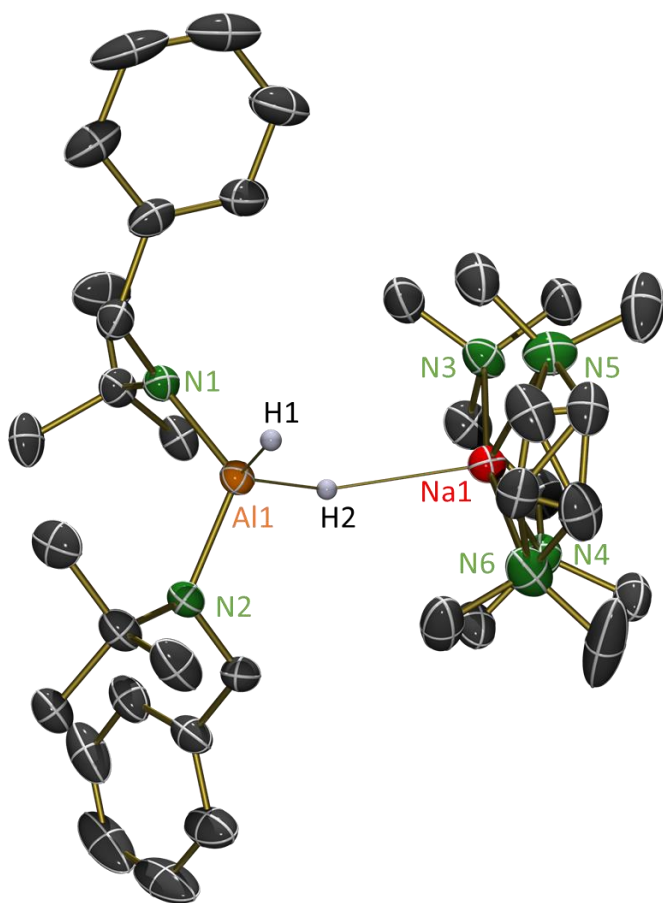

Figure S41: ORTEP-plot (50% probability) of  $\text{NaAlH}_2[\text{N}(\text{tBu})\text{CH}_2\text{Ph}]_2 \cdot (\text{TMEDA})_2$  (**2**). H atoms except for those bound to Al are omitted for clarity.

### Structure determination of $\text{NaAlH}_2[\text{N}(\text{tBu})\text{CH}_2\text{Ph}]_2 \cdot \text{PMDTA}$ (**3**)

A colorless crystal of  $[(\text{pmdta})\text{Na}(\text{H})_2\text{Al}(\text{tBuNCH}_2\text{C}_6\text{H}_5)_2]$  was embedded in inert perfluoropolyalkylether (viscosity 1800 cSt; ABCR GmbH) and mounted using a Hampton Research CryoLoop. The crystal was then

flash cooled to 100.0(2) K in a nitrogen gas stream and kept at this temperature during the experiment. The crystal structure was measured on a SuperNova diffractometer with Atlas S2 detector using a CuK $\alpha$  microfocus source. The measured data was processed with the CrysAlisPro (v40.53) software package.<sup>[S4]</sup> Using Olex2,<sup>[S5]</sup> the structure was solved with the ShelXT<sup>[S6]</sup> structure solution program using Intrinsic Phasing and refined with the ShelXL<sup>[S7]</sup> refinement package using Least Squares Minimization. All non-hydrogen atoms were refined anisotropically. Most hydrogen atoms were placed in ideal positions and refined as riding atoms with relative isotropic displacement parameters. The metal bound hydrides were observed from difference Fourier maps and refined.

Disorder of one benzyl group and of the pmdta ligand was observed. The disorder was modeled with the help of similarity restraints (SIMU, SADI) and rigid bond restraints (RIGU).<sup>[S8]</sup> The relative occupancies of the two alternative orientations of each group were refined to 0.60(2)/0.40(2) (benzyl) and 0.646(5)/0.354(5) (pmdta), respectively.

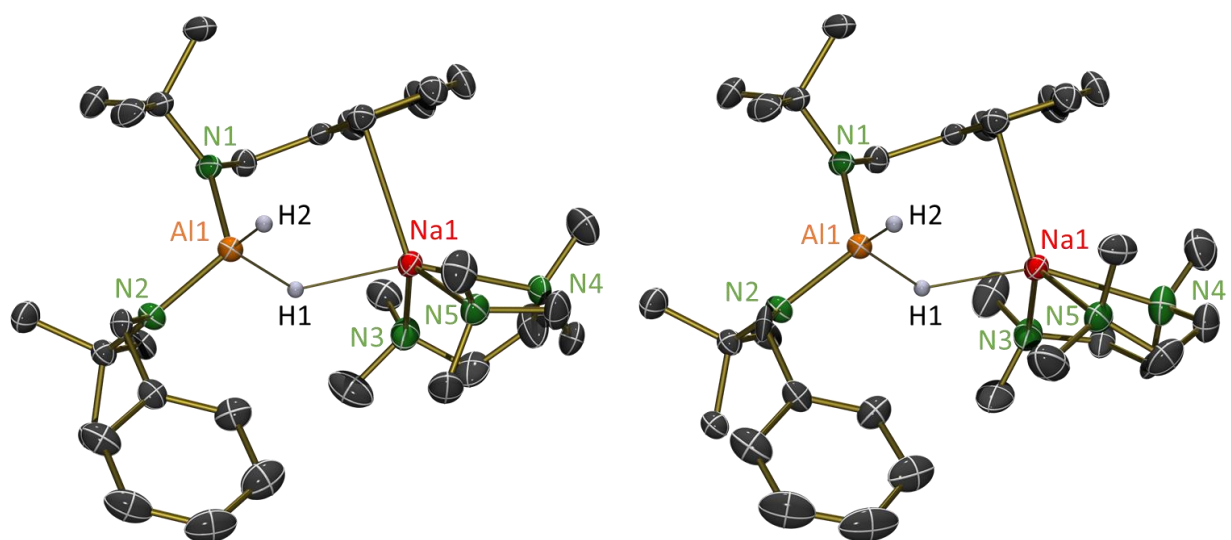

Figure S42: ORTEP-plot (50% probability) of NaAlH<sub>2</sub>[N(tBu)CH<sub>2</sub>Ph]<sub>2</sub>·PMDTA (**3**). H atoms except for those bound to Al are omitted for clarity. Due to disorder, the different orientations of the amide and PMDTA are shown left and right respectively.

#### Structure determination of KAlH<sub>2</sub>[N(tBu)CH<sub>2</sub>Ph]<sub>2</sub>·18-crown-6 (**4**)

A colorless crystal of [(18-crown-6)K(H)<sub>2</sub>Al(tBuNCH<sub>2</sub>C<sub>6</sub>H<sub>5</sub>)<sub>2</sub>] was embedded in inert perfluoropolyalkylether (viscosity 1800 cSt; ABCR GmbH) and mounted using a Hampton Research CryoLoop. The crystal was then flash cooled to 100.0(2) K in a nitrogen gas stream and kept at this temperature during the experiment. The crystal structure was measured on a SuperNova diffractometer with Atlas S2 detector using a CuK $\alpha$  microfocus source. The measured data was processed with the CrysAlisPro (v40.53) software package.<sup>[S4]</sup> Using Olex2,<sup>[S5]</sup> the structure was solved with the ShelXT<sup>[S6]</sup> structure solution program using Intrinsic Phasing and refined with the ShelXL<sup>[S7]</sup> refinement package using Least Squares Minimization. All non-hydrogen atoms were refined anisotropically. Most hydrogen atoms were placed in ideal positions and

refined as riding atoms with relative isotropic displacement parameters. The metal bound hydrides were observed from difference Fourier maps and refined.

Disorder of one benzyl group and of the whole K(18-crown-6) fragment was observed. The disorder was modeled with the help of similarity restraints (SIMU, SADI) and rigid bond restraints (RIGU).<sup>[S8]</sup> Additionally, a FLAT restraint was used for the aromatic ring of the less occupied orientation of the benzyl moiety. The relative occupancies of the two alternative orientations of the benzyl group were refined to 0.681(18) and 0.319(18), respectively. The disorder of the K(18-crown-6) fragment was more severe. While the potassium ion has two alternative positions with relative occupancies of 0.7986(14) and 0.2013(14), at least the 18-crown-6 ligand, which corresponds to the major potassium position, is additionally disordered (disorder within a disorder). Therefore, it was necessary to model the disorder of two sections of this 18-crown-6 as three alternative orientations. The related site occupancy factors are 0.460(3)/0.2013(14)/0.339(3) (section 1) and 0.455(3)/0.2013(14)/0.344(3) (section 2), respectively

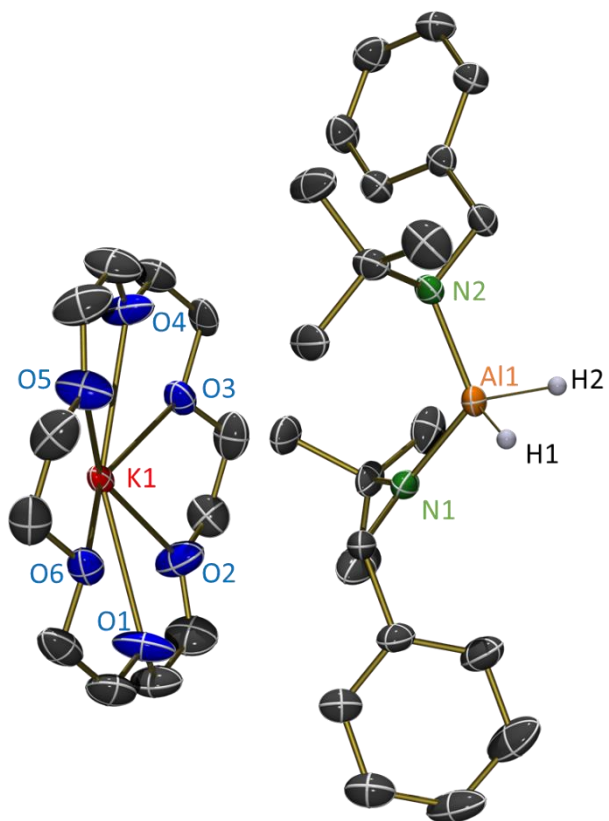

Figure S43: ORTEP-plot (50% probability) of  $\text{KAlH}_2[\text{N}(\text{tBu})\text{CH}_2\text{Ph}]_2 \cdot 18\text{-crown-6}$  (**4**). H atoms except for those bound to Al are omitted for clarity. Disorder in the 18-crown-6 ligand and the phenyl ring of one amide omitted for clarity.

### Structure Determination of $\text{LiAlH}_2[\text{N}(\text{tBu})\text{CH}_2\text{tBu}]_2 \cdot (\text{TMEDA})$ (5)

A colorless crystal of  $[(\text{tmeda})\text{Li}(\text{H})_2\text{Al}(\text{tBuNCH}_2\text{tBu})_2]$  was embedded in inert perfluoropolyalkylether (viscosity 1800 cSt; ABCR GmbH) and mounted using a Hampton Research CryoLoop. The crystal was then flash cooled to 100.0(2) K in a nitrogen gas stream and kept at this temperature during the experiment. The crystal structure was measured on a SuperNova diffractometer with Atlas S2 detector using a  $\text{CuK}\alpha$  microfocus source. The measured data was processed with the CrysAlisPro (v40.67a) software package.<sup>[S9]</sup> Using Olex2,<sup>[S5]</sup> the structure was solved with the ShelXT<sup>[S6]</sup> structure solution program using Intrinsic Phasing and refined with the ShelXL<sup>[S7]</sup> refinement package using Least Squares Minimization. Most hydrogen atoms were placed in ideal positions and refined as riding atoms with relative isotropic displacement parameters. The metal bound hydrides were observed from difference Fourier maps and refined.

Disorder of one  $\text{tBuNCH}_2\text{tBu}$  ligand was observed and modeled with the help of similarity restraints (SIMU, SADI) and rigid bond restraints (RIGU).<sup>[S8]</sup> The relative occupancies of the two alternative orientations were refined to 0.787(2) and 0.213(2).

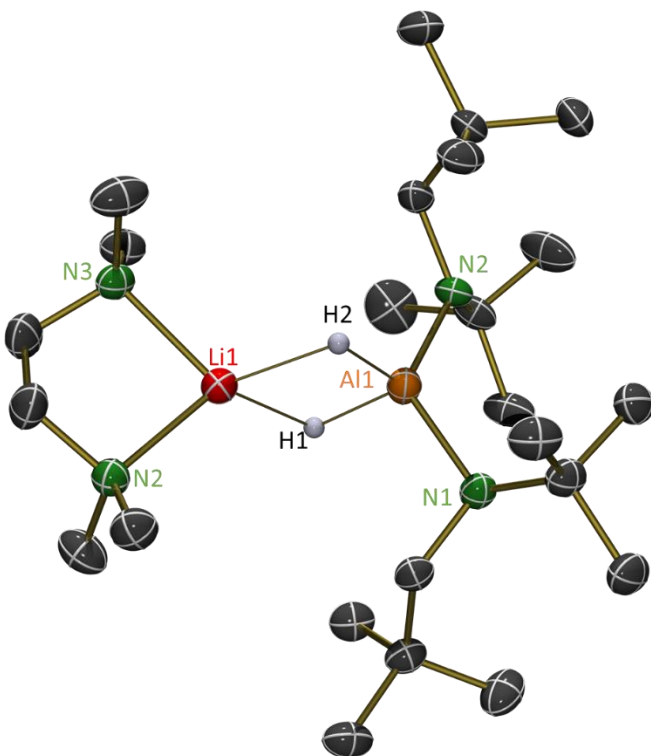

Figure S44: ORTEP-plot (50% probability) of  $\text{LiAlH}_2[\text{N}(\text{tBu})\text{CH}_2\text{tBu}]_2 \cdot (\text{TMEDA})$  (5). H atoms except for those bound to Al are omitted for clarity. Disorder in one amide ligand omitted for clarity.

### Structure Determination of $\text{LiAl}[\text{N}(\text{Ph})\text{CH}_2\text{Ph}]_4 \cdot (\text{THF})_4$ (6)

A colorless crystal of  $\text{LiAl}[\text{N}(\text{Ph})\text{CH}_2\text{Ph}]_4 \cdot (\text{THF})_4$  was embedded in inert perfluoropolyalkylether (viscosity 1800 cSt; ABCR GmbH) and mounted using a Hampton Research CryoLoop. The crystal was then flash cooled to 100.0(2) K in a nitrogen gas stream and kept at this temperature during the experiment. The

crystal structure was measured on a SuperNova diffractometer with Atlas S2 detector using a CuK $\alpha$  microfocus source. The measured data was processed with the CrysAlisPro (v40.53) software package.<sup>[S4]</sup> Using Olex2,<sup>[S5]</sup> the structure was solved with the ShelXT<sup>[S6]</sup> structure solution program using Intrinsic Phasing and refined with the ShelXL<sup>[S7]</sup> refinement package using Least Squares Minimization. All hydrogen atoms were placed in ideal positions and refined as riding atoms with relative isotropic displacement parameters. The crystal under investigation suffered from non-merohedral twinning. The fractional contributions of the two twin domains were refined to 0.6944(17) and 0.3056(17).

Both, the lithium and the aluminum atom reside on a crystallographic mirror plane, while the thf and amide ligands are disordered about this symmetry element. The disorder was modeled with the help of similarity restraints (SIMU, SADI) and an additional FLAT restraint to keep the carbon atoms C34 – C39 of a phenyl group in-plane.

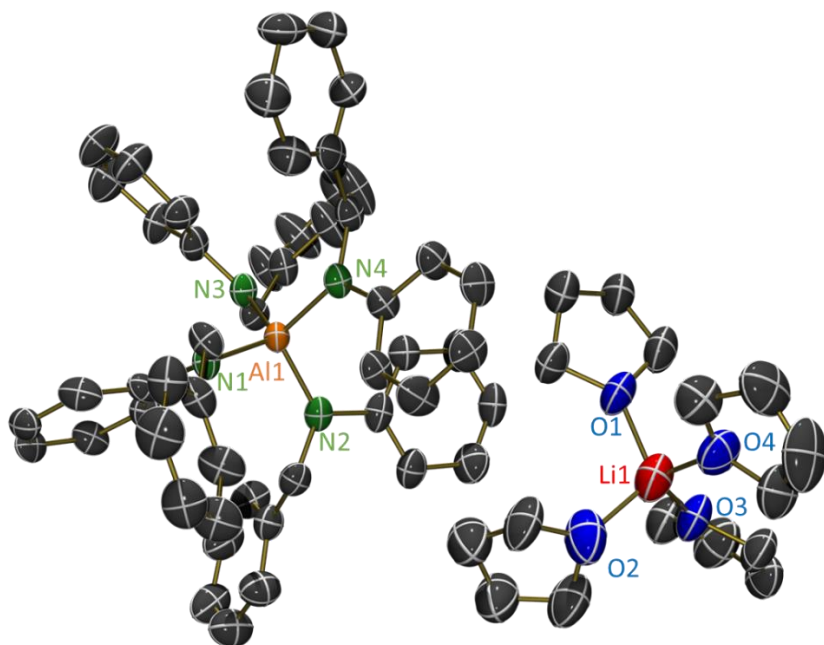

Figure S45: ORTEP-plot (50% probability) of LiAl[N(Ph)CH<sub>2</sub>Ph]<sub>4</sub>·(THF)<sub>4</sub> (**6**). H are omitted for clarity.

### Structure Determination of **7**

A colorless crystal of **7** was embedded in inert perfluoropolyalkylether (viscosity 1800 cSt; ABCR GmbH) and mounted using a Hampton Research CryoLoop. The crystal was then flash cooled to 100.0(1) K in a nitrogen gas stream and kept at this temperature during the experiment. The crystal structure was measured on a SuperNova diffractometer with Atlas S2 detector using a CuK $\alpha$  microfocus source. The measured data was processed with the CrysAlisPro (v39.46) software package.<sup>[S4]</sup> Using Olex2<sup>[S5]</sup>, the structure was solved with the ShelXT<sup>[S6]</sup> structure solution program using Intrinsic Phasing and refined with the ShelXL<sup>[S7]</sup> refinement package using Least Squares minimization. Except of the NH hydrogen atom, all hydrogen atoms were placed in ideal positions and refined as riding atoms with relative isotropic displacement parameters. The position of the NH hydrogen atom was observed from difference Fourier

maps and refined. The crystal shows disorder concerning coordination of substrate/product (imine/amine). The disorder was refined over two positions (ratio ~ 50:50).

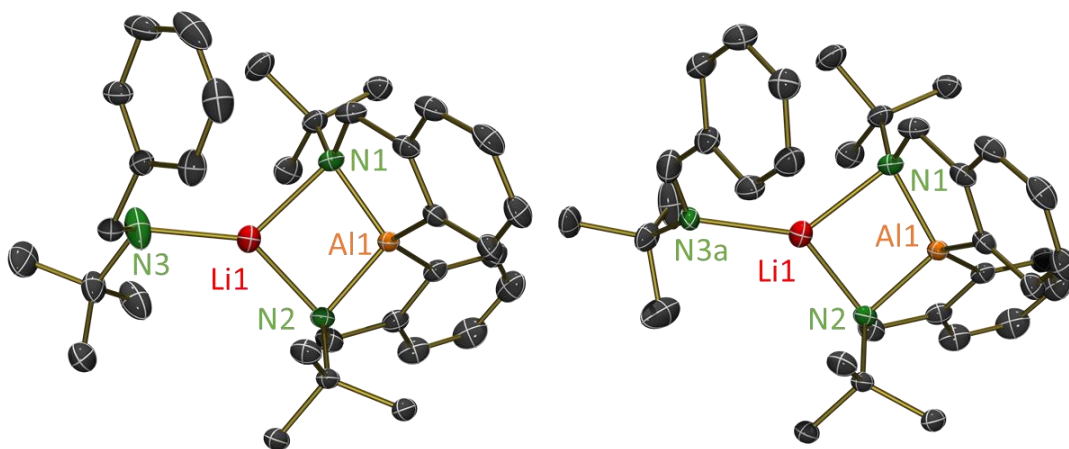

Figure S46: ORTEP-plot (50% probability) of **7**. H atoms except for those bound to Al are omitted for clarity. Due to disorder, the coordination of imine and amine are shown left and right respectively.

### Structure determination of **8**

A colorless crystal of  $[\text{Li}(\text{thf})_4][\text{Al}(\text{tBuNCH}_2\text{C}_6\text{H}_4)_2]$  was embedded in inert perfluoropolyalkylether (viscosity 1800 cSt; ABCR GmbH) and mounted using a Hampton Research CryoLoop. The crystal was then flash cooled to 100.0(3) K in a nitrogen gas stream and kept at this temperature during the experiment. The crystal structure was measured on a SuperNova diffractometer with Atlas S2 detector using a  $\text{CuK}\alpha$  microfocus source. The measured data was processed with the CrysAlisPro (v40.53) software package.<sup>[S4]</sup> Using Olex2,<sup>[S5]</sup> the structure was solved with the ShelXT<sup>[S6]</sup> structure solution program using Intrinsic Phasing and refined with the ShelXL<sup>[S7]</sup> refinement package using Least Squares Minimization. All non-hydrogen atoms were refined anisotropically. All hydrogen atoms were placed in ideal positions and refined as riding atoms with relative isotropic displacement parameters. The crystal under investigation suffered from non-merohedral twinning. The fractional contributions of the two twin domains were refined to 0.6321(9) and 0.3679(9).

Additionally, disorder of one thf ligand was observed and modeled with the help of similarity restraints (SIMU, SADI). The relative occupancies of its two alternative orientations were refined to 0.79(2) and 0.21(2), respectively.

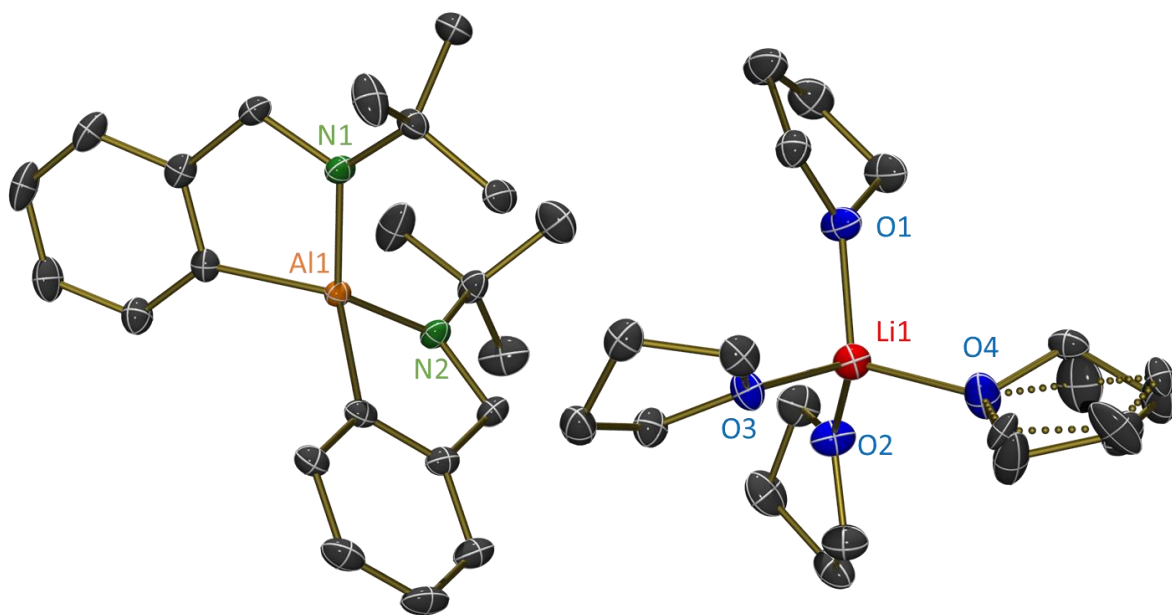

Figure S47: ORTEP-plot (50% probability) of **8**. H atoms are omitted for clarity.

Table S1: Crystal data.

| Identification code (CCDC)                  | <b>1</b> (2024356)                                                | <b>2</b> (2024357)                                            | <b>3</b> (2024358)                                            |
|---------------------------------------------|-------------------------------------------------------------------|---------------------------------------------------------------|---------------------------------------------------------------|
| Empirical formula                           | C <sub>49</sub> H <sub>81</sub> AlLiN <sub>3</sub> O <sub>4</sub> | C <sub>34</sub> H <sub>66</sub> AlN <sub>6</sub> Na           | C <sub>31</sub> H <sub>57</sub> AlN <sub>5</sub> Na           |
| Formula weight                              | 810.08                                                            | 608.89                                                        | 549.78                                                        |
| Temperature/K                               | 100.0(1)                                                          | 100.00(11)                                                    | 100.0(2)                                                      |
| Crystal system                              | orthorhombic                                                      | monoclinic                                                    | orthorhombic                                                  |
| Space group                                 | Aea2                                                              | P2 <sub>1</sub> /n                                            | Pbca                                                          |
| a/Å                                         | 28.8649(2)                                                        | 11.4625(2)                                                    | 13.0409(2)                                                    |
| b/Å                                         | 19.2621(2)                                                        | 16.9597(2)                                                    | 17.1247(3)                                                    |
| c/Å                                         | 17.41050(10)                                                      | 20.1935(3)                                                    | 30.7112(4)                                                    |
| α/°                                         | 90                                                                | 90                                                            | 90                                                            |
| β/°                                         | 90                                                                | 95.190(2)                                                     | 90                                                            |
| γ/°                                         | 90                                                                | 90                                                            | 90                                                            |
| Volume/Å <sup>3</sup>                       | 9680.21(13)                                                       | 3909.53(10)                                                   | 6858.45(19)                                                   |
| Z                                           | 8                                                                 | 4                                                             | 8                                                             |
| ρ <sub>calc</sub> /g/cm <sup>3</sup>        | 1.112                                                             | 1.034                                                         | 1.065                                                         |
| μ/mm <sup>-1</sup>                          | 0.696                                                             | 0.767                                                         | 0.822                                                         |
| F(000)                                      | 3552.0                                                            | 1344.0                                                        | 2416.0                                                        |
| Crystal size/mm <sup>3</sup>                | 0.503 × 0.247 × 0.202                                             | 0.399 × 0.294 × 0.199                                         | 0.206 × 0.111 × 0.083                                         |
| Radiation                                   | Cu Kα (λ = 1.54184)                                               | Cu Kα (λ = 1.54184)                                           | Cu Kα (λ = 1.54184)                                           |
| 2θ range for data collection/°              | 6.124 to 145.608                                                  | 8.554 to 144.766                                              | 8.896 to 145.426                                              |
| Index ranges                                | -35 ≤ h ≤ 35, -21 ≤ k ≤ 23, -17 ≤ l ≤ 21                          | -12 ≤ h ≤ 14, -20 ≤ k ≤ 20, -17 ≤ l ≤ 24                      | -15 ≤ h ≤ 14, -20 ≤ k ≤ 20, -37 ≤ l ≤ 31                      |
| Reflections collected                       | 43938                                                             | 21932                                                         | 15730                                                         |
| Independent reflections                     | 8559 [R <sub>int</sub> = 0.0257, R <sub>sigma</sub> = 0.0192]     | 7549 [R <sub>int</sub> = 0.0273, R <sub>sigma</sub> = 0.0253] | 6630 [R <sub>int</sub> = 0.0313, R <sub>sigma</sub> = 0.0342] |
| Data/restraints/parameters                  | 8559/1/536                                                        | 7549/9/420                                                    | 6630/399/522                                                  |
| Goodness-of-fit on F <sup>2</sup>           | 1.027                                                             | 1.086                                                         | 1.022                                                         |
| Final R indexes [I ≥ 2σ (I)]                | R <sub>1</sub> = 0.0274, wR <sub>2</sub> = 0.0697                 | R <sub>1</sub> = 0.0591, wR <sub>2</sub> = 0.1557             | R <sub>1</sub> = 0.0505, wR <sub>2</sub> = 0.1334             |
| Final R indexes [all data]                  | R <sub>1</sub> = 0.0281, wR <sub>2</sub> = 0.0705                 | R <sub>1</sub> = 0.0653, wR <sub>2</sub> = 0.1614             | R <sub>1</sub> = 0.0608, wR <sub>2</sub> = 0.1448             |
| Largest diff. peak/hole / e Å <sup>-3</sup> | 0.20/-0.18                                                        | 0.54/-0.28                                                    | 0.46/-0.34                                                    |



Table S1: Continued.

| Identification code (CCDC)                  | 4 (2024359)                                                      | 5 (2024360)                                                   | 6 (2024361)                                                       |
|---------------------------------------------|------------------------------------------------------------------|---------------------------------------------------------------|-------------------------------------------------------------------|
| Empirical formula                           | C <sub>34</sub> H <sub>58</sub> AlKN <sub>2</sub> O <sub>6</sub> | C <sub>24</sub> H <sub>58</sub> AlLiN <sub>4</sub>            | C <sub>68</sub> H <sub>80</sub> AlLiN <sub>4</sub> O <sub>4</sub> |
| Formula weight                              | 656.90                                                           | 436.66                                                        | 1051.28                                                           |
| Temperature/K                               | 100.0(2)                                                         | 100.0(1)                                                      | 100.0(2)                                                          |
| Crystal system                              | orthorhombic                                                     | monoclinic                                                    | monoclinic                                                        |
| Space group                                 | Pbca                                                             | P2 <sub>1</sub> /c                                            | P2 <sub>1</sub> /m                                                |
| a/Å                                         | 10.4344(3)                                                       | 11.7729(3)                                                    | 11.7199(6)                                                        |
| b/Å                                         | 16.9623(5)                                                       | 11.0678(3)                                                    | 19.4526(9)                                                        |
| c/Å                                         | 42.5886(9)                                                       | 22.8213(6)                                                    | 12.8802(8)                                                        |
| α/°                                         | 90                                                               | 90                                                            | 90                                                                |
| β/°                                         | 90                                                               | 92.037(2)                                                     | 95.899(5)                                                         |
| γ/°                                         | 90                                                               | 90                                                            | 90                                                                |
| Volume/Å <sup>3</sup>                       | 7537.8(3)                                                        | 2971.74(13)                                                   | 2920.9(3)                                                         |
| Z                                           | 8                                                                | 4                                                             | 2                                                                 |
| ρ <sub>calc</sub> /g/cm <sup>3</sup>        | 1.158                                                            | 0.976                                                         | 1.195                                                             |
| μ/mm <sup>-1</sup>                          | 1.792                                                            | 0.688                                                         | 0.705                                                             |
| F(000)                                      | 2848.0                                                           | 984.0                                                         | 1128.0                                                            |
| Crystal size/mm <sup>3</sup>                | 0.194 × 0.094 × 0.075                                            | 0.32 × 0.171 × 0.143                                          | 0.168 × 0.159 × 0.061                                             |
| Radiation                                   | Cu Kα (λ = 1.54184)                                              | Cu Kα (λ = 1.54184)                                           | Cu Kα (λ = 1.54184)                                               |
| 2θ range for data collection/°              | 8.304 to 145.424                                                 | 7.514 to 145.692                                              | 7.584 to 144.734                                                  |
| Index ranges                                | -6 ≤ h ≤ 12, -18 ≤ k ≤ 20, -52 ≤ l ≤ 36                          | -14 ≤ h ≤ 13, -13 ≤ k ≤ 13, -26 ≤ l ≤ 28                      | -14 ≤ h ≤ 14, -23 ≤ k ≤ 23, -15 ≤ l ≤ 15                          |
| Reflections collected                       | 17113                                                            | 22800                                                         | 9908                                                              |
| Independent reflections                     | 7273 [R <sub>int</sub> = 0.0287, R <sub>sigma</sub> = 0.0331]    | 5811 [R <sub>int</sub> = 0.0358, R <sub>sigma</sub> = 0.0262] | 9908 [R <sub>int</sub> = ?, R <sub>sigma</sub> = 0.0251]          |
| Data/restraints/parameters                  | 7273/3216/679                                                    | 5811/159/392                                                  | 9908/2597/695                                                     |
| Goodness-of-fit on F <sup>2</sup>           | 1.020                                                            | 1.028                                                         | 1.043                                                             |
| Final R indexes [I ≥ 2σ (I)]                | R <sub>1</sub> = 0.0574, wR <sub>2</sub> = 0.1386                | R <sub>1</sub> = 0.0446, wR <sub>2</sub> = 0.1162             | R <sub>1</sub> = 0.0848, wR <sub>2</sub> = 0.2308                 |
| Final R indexes [all data]                  | R <sub>1</sub> = 0.0691, wR <sub>2</sub> = 0.1477                | R <sub>1</sub> = 0.0492, wR <sub>2</sub> = 0.1215             | R <sub>1</sub> = 0.1004, wR <sub>2</sub> = 0.2388                 |
| Largest diff. peak/hole / e Å <sup>-3</sup> | 0.64/-0.39                                                       | 0.60/-0.73                                                    | 0.37/-0.36                                                        |

Table S1: Continued.

|                                             |                                                               |                                                                   |
|---------------------------------------------|---------------------------------------------------------------|-------------------------------------------------------------------|
| Identification code (CCDC)                  | <b>7</b> (2024362)                                            | <b>8</b> (2024363)                                                |
| Empirical formula                           | C <sub>33</sub> H <sub>46</sub> AlLiN <sub>3</sub>            | C <sub>38</sub> H <sub>62</sub> AlLiN <sub>2</sub> O <sub>4</sub> |
| Formula weight                              | 518.66                                                        | 644.81                                                            |
| Temperature/K                               | 100                                                           | 100.0(3)                                                          |
| Crystal system                              | Monoclinic                                                    | monoclinic                                                        |
| Space group                                 | P2 <sub>1</sub> /n                                            | P2 <sub>1</sub>                                                   |
| a/Å                                         | 10.59708(6)                                                   | 10.7366(11)                                                       |
| b/Å                                         | 17.20443(9)                                                   | 16.7030(13)                                                       |
| c/Å                                         | 16.60664(10)                                                  | 11.1891(11)                                                       |
| α/°                                         | 90                                                            | 90                                                                |
| β/°                                         | 90.7848(6)                                                    | 109.155(11)                                                       |
| γ/°                                         | 90                                                            | 90                                                                |
| Volume/Å <sup>3</sup>                       | 3027.39(3)                                                    | 1895.5(3)                                                         |
| Z                                           | 4                                                             | 2                                                                 |
| ρ <sub>calc</sub> /cm <sup>3</sup>          | 1.138                                                         | 1.130                                                             |
| μ/mm <sup>-1</sup>                          | 0.759                                                         | 0.764                                                             |
| F(000)                                      | 1124.0                                                        | 704.0                                                             |
| Crystal size/mm <sup>3</sup>                | 0.576 × 0.435 × 0.353                                         | 0.171 × 0.147 × 0.083                                             |
| Radiation                                   | CuKα (λ = 1.54184)                                            | Cu Kα (λ = 1.54184)                                               |
| 2θ range for data collection/°              | 7.4 to 145.868                                                | 8.366 to 145.286                                                  |
| Index ranges                                | -13 ≤ h ≤ 13, -21 ≤ k ≤ 21, -20 ≤ l ≤ 20                      | -13 ≤ h ≤ 13, -20 ≤ k ≤ 20, -13 ≤ l ≤ 13                          |
| Reflections collected                       | 55738                                                         | 13786                                                             |
| Independent reflections                     | 5994 [R <sub>int</sub> = 0.0369, R <sub>sigma</sub> = 0.0148] | 13786 [R <sub>int</sub> = ?, R <sub>sigma</sub> = 0.0222]         |
| Data/restraints/parameters                  | 5994/0/459                                                    | 13786/230/459                                                     |
| Goodness-of-fit on F <sup>2</sup>           | 1.045                                                         | 1.019                                                             |
| Final R indexes [I >= 2σ (I)]               | R <sub>1</sub> = 0.0352, wR <sub>2</sub> = 0.0920             | R <sub>1</sub> = 0.0412, wR <sub>2</sub> = 0.1081                 |
| Final R indexes [all data]                  | R <sub>1</sub> = 0.0367, wR <sub>2</sub> = 0.0932             | R <sub>1</sub> = 0.0431, wR <sub>2</sub> = 0.1092                 |
| Largest diff. peak/hole / e Å <sup>-3</sup> | 0.24/-0.25                                                    | 0.28/-0.28                                                        |

## Calculations

### Computational Details

All calculations were carried out using Gaussian 16A.<sup>[S10]</sup> All structures were fully optimized on a B3PW91/6-31+G\*\* level of theory.<sup>[S11-S15]</sup> Harmonic frequency calculations were carried out on the same level of theory to characterize the structures as minima (NIMAG=0) or transition states (NIMAG=1). For higher accuracy, single point energies were determined on B3PW91/6-311++G\*\*//6-31+G\*\* level of theory. Solvent effects were modeled via polarizable continuum model (PCM) simulating THF ( $\epsilon = 7.4257$ ).<sup>[S16]</sup> In all energy profiles  $\Delta H$  is given in kcal/mol.

### Effect of solvation

Initial calculations were carried out using a simple model system with imine MeC(H)=NMe and LiAlH<sub>4</sub>·TMEDA as catalyst. This allowed for the identification of stationary point geometries and the evaluation of solvent effects. TMEDA was chosen as explicit solvent as experimental results found that it does not have a negative effect on catalytic performance. It also provides a more realistic solvation effect than continuum based solvent models like PCM.

Imine to amide reduction was found to have activation barriers of **M1-M2\***: 18.1, **M7-M8\***: 12.1, **M10-M11\***: 11.0 kcal/mol. Imine insertion into the metal hydride bond becomes easier with an increasing number of amide ligands present. Four imine insertions, however, are not possible. The rate determining step is generally the hydrogenolysis step with **M4-M5\***: 31.2 and **M13-M14\***: 32.2 kcal/mol. These energies are slightly too high for a reaction at 85 °C. This may be partially attributed to the fact that imines with alkyl substituents on C and N are difficult to convert.

Removal of TMEDA (energy levels **M1'-M2'\*** and **M10'-M11'\*** marked in red) shows an increase for the imine insertion barriers. Without the explicit solvent molecule coordinated to lithium, the activation energies for these two steps increased from 18.1 to 20.0 and from 11.0 to 24.6 kcal/mol, respectively. This is an effective increase in activation barrier of 18 and 55 %. It shows that, for strongly ionic species such as LiAlH<sub>4</sub>, it is very important to model solvation explicitly with solvent molecules (or in this case a polar imine). For further calculations (Mechanisms A-D) imine PhC(H)=NtBu was chosen as both substrate and coordinated solvent molecule (the majority of catalytic experiments were carried out in neat imine without additional solvent).

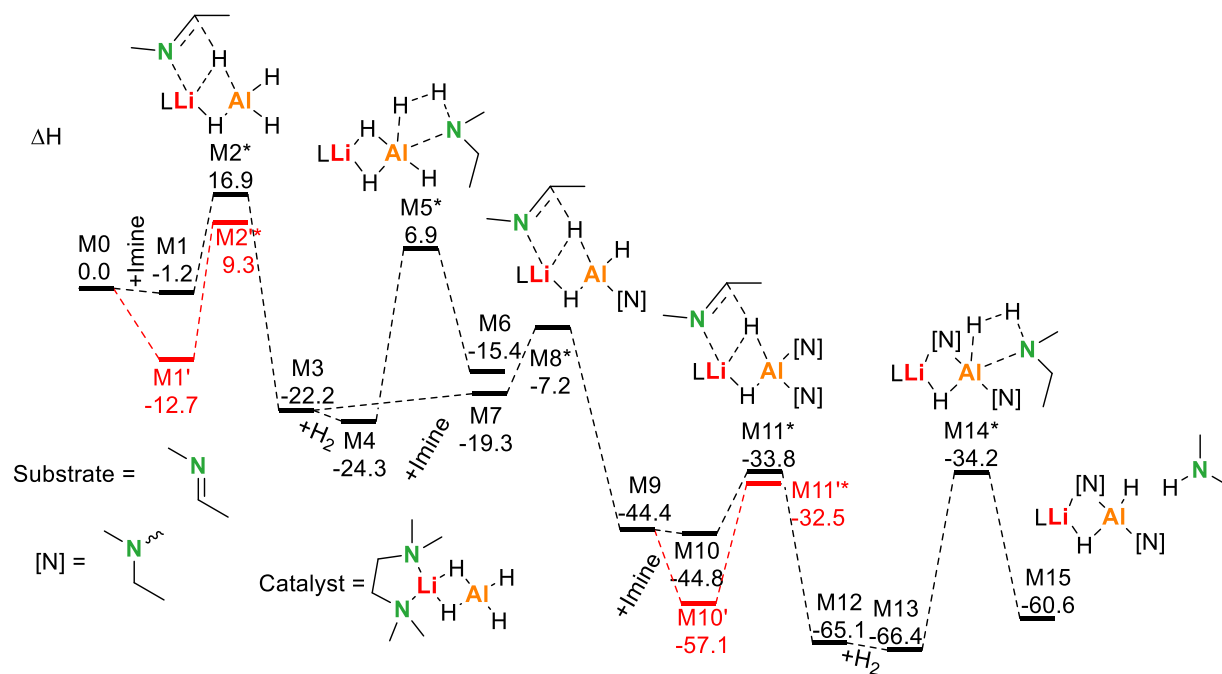

Scheme S1: Energy profile (B3PW91/6-311++G\*\* (PCM=THF)//6-31+G\*\*) for the hydrogenation of MeC(H)=NMe with the catalyst LiAlH<sub>4</sub>·TMEDA (L = TMEDA, [N] = N(Me)Et). The energy levels in red (**M1'**, **M2'**, **M10'** and **M11'**) represent optimized structures without the TMEDA ligand.

## Thermodynamics of sequential imine insertion in LiAlH<sub>4</sub>

The reaction energies for insertion of different imines in the Al-H bonds of LiAlH<sub>4</sub> have been calculated. It can be concluded that *t*BuC(H)=N*t*Bu can realistically insert twice and PhC(H)=N*t*Bu three times. More insertions are endothermic and endergonic. After four imine insertions the complex dissociates in Al amide and Li amide species. The highly activated imine, PhC(H)=NPh, can insert four times and the resulting complex is stable die to Ph...Li interactions.

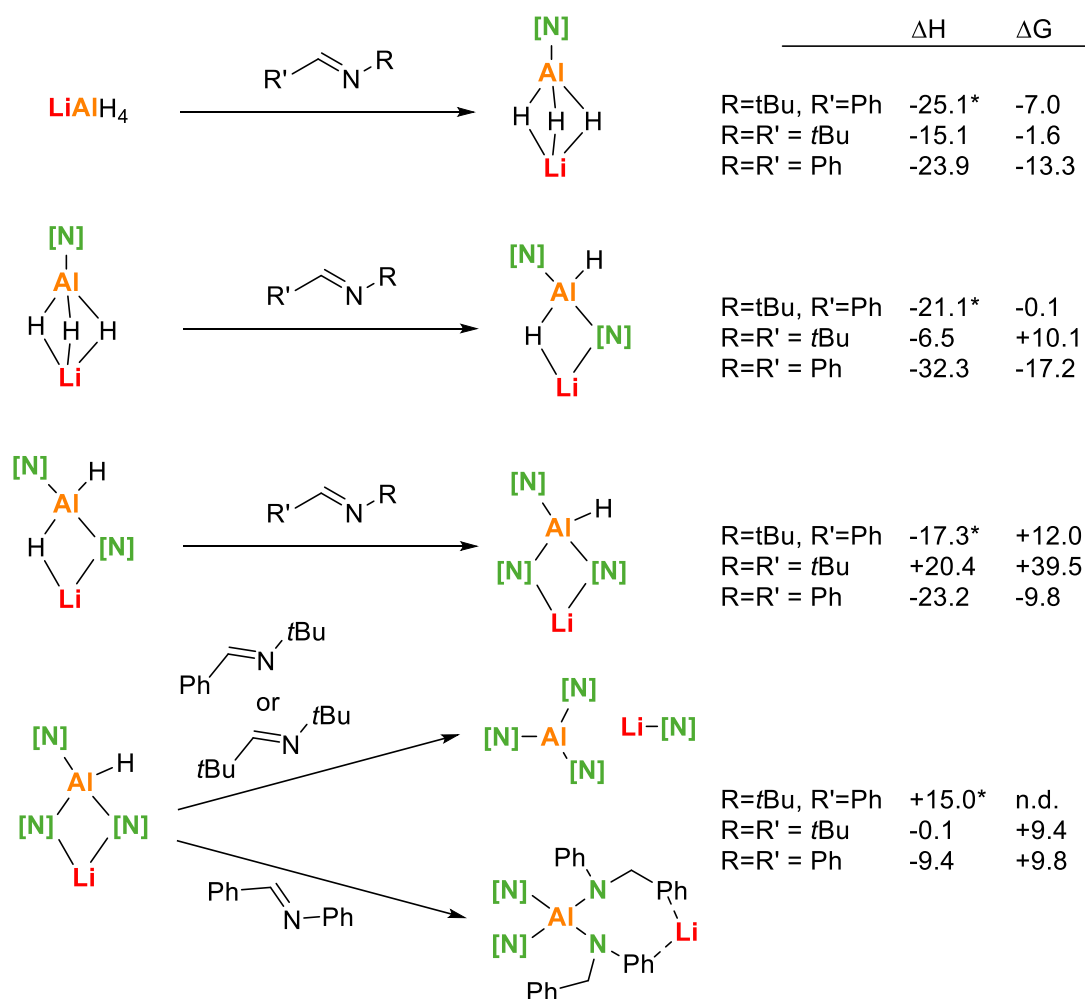

Scheme S2: Reaction energy for the reaction of LiAlH<sub>4</sub> with one, two, three, and four equivalents of PhC(H)=N*t*Bu, *t*BuC(H)=N*t*Bu, and Ph(H)C=NPh.  $\Delta H$  and  $\Delta G$  (85 °C, 6 bar, PCM correction for the polar solvent THF) given in kcal/mol. \*For PhC(H)=N*t*Bu only  $\Delta E$  was calculated instead of  $\Delta H$ .<sup>[S17]</sup>

## Energy profiles with DG values (kcal/mol)

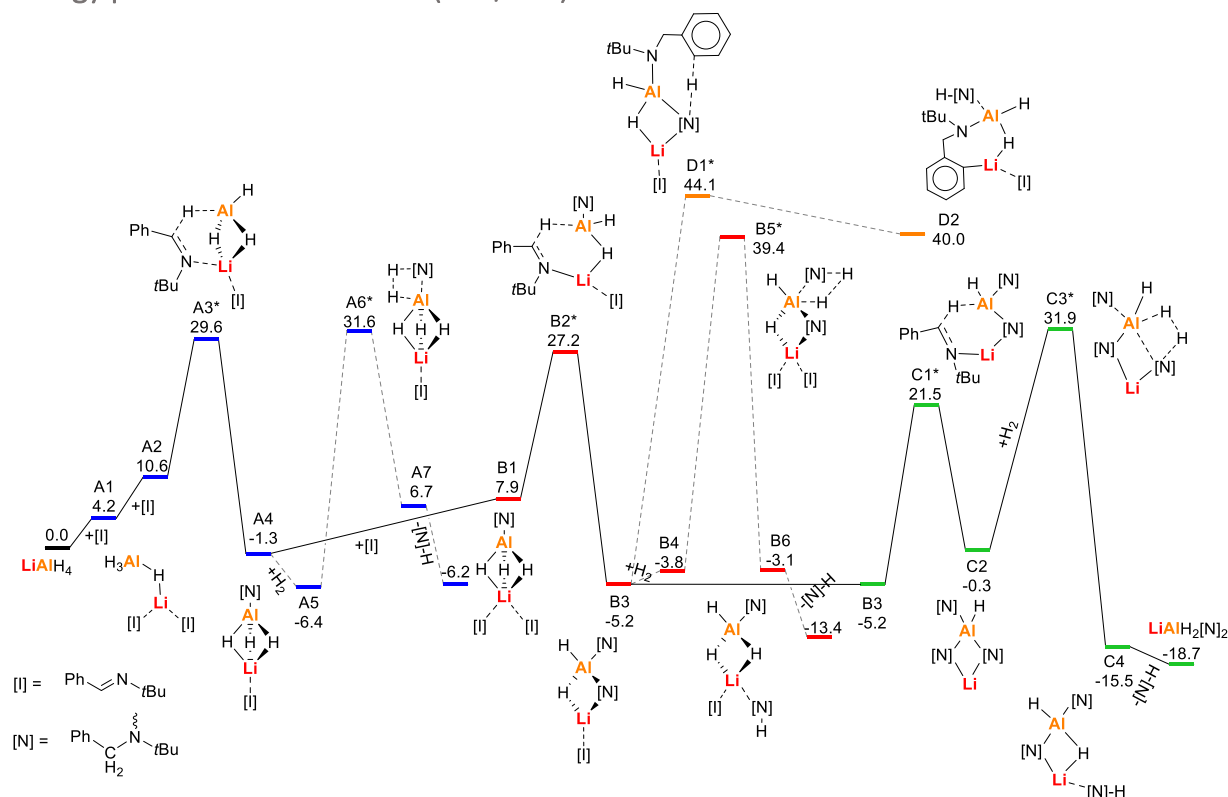

Scheme S3: Full energy profile ( $\Delta G$  (358 K, 6 bar)) for the hydrogenation of PhC(H)=NtBu with LiAlH<sub>4</sub> using the imine as explicit solvent (B3PW91/6-311++G\*\* (PCM=THF)//6-31+G\*\*). Pathways A (blue) and B (red) show the formation of the active catalyst: LiAlH<sub>2</sub>[N]<sub>2</sub> (B3). Pathway C (green) represents the catalytic cycle for **B3**. B3 is the catalytic cycle. Path D (grey) shows a pathway for catalyst decomposition by ortho-metalation. The most likely intermediates are connected by solid lines.

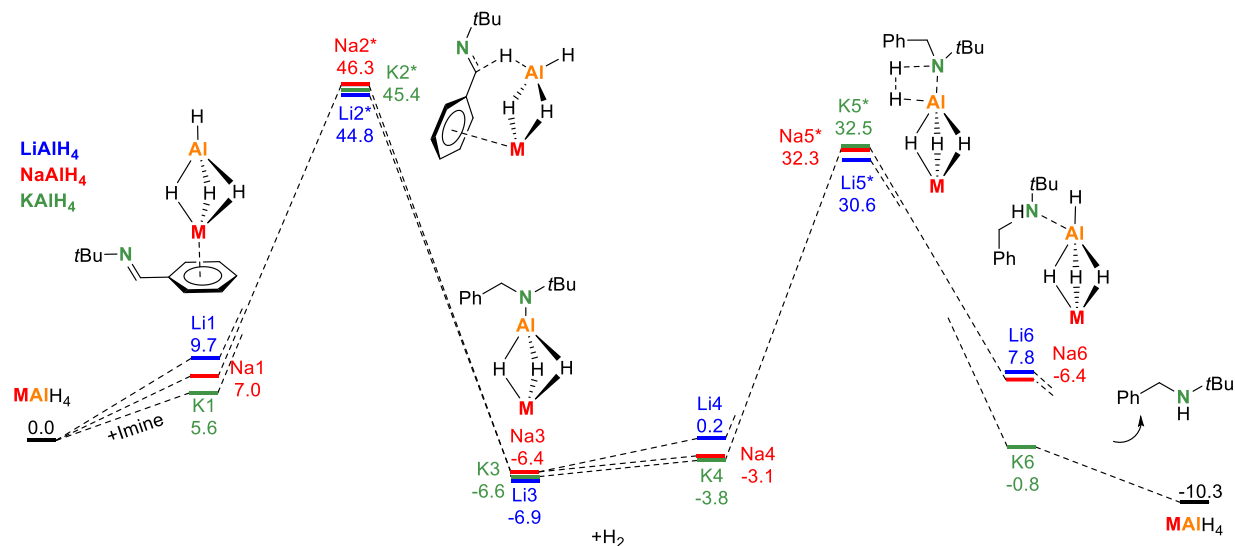

Scheme S4: Comparison of the metal influence on hydrogenation of imines with MAIH<sub>4</sub> catalysts (M = Li, Na, K) ( $\Delta G$  (358 K, 6 bar)); B3PW91/6-311++G\*\* (PCM=THF)//6-31+G\*\*.

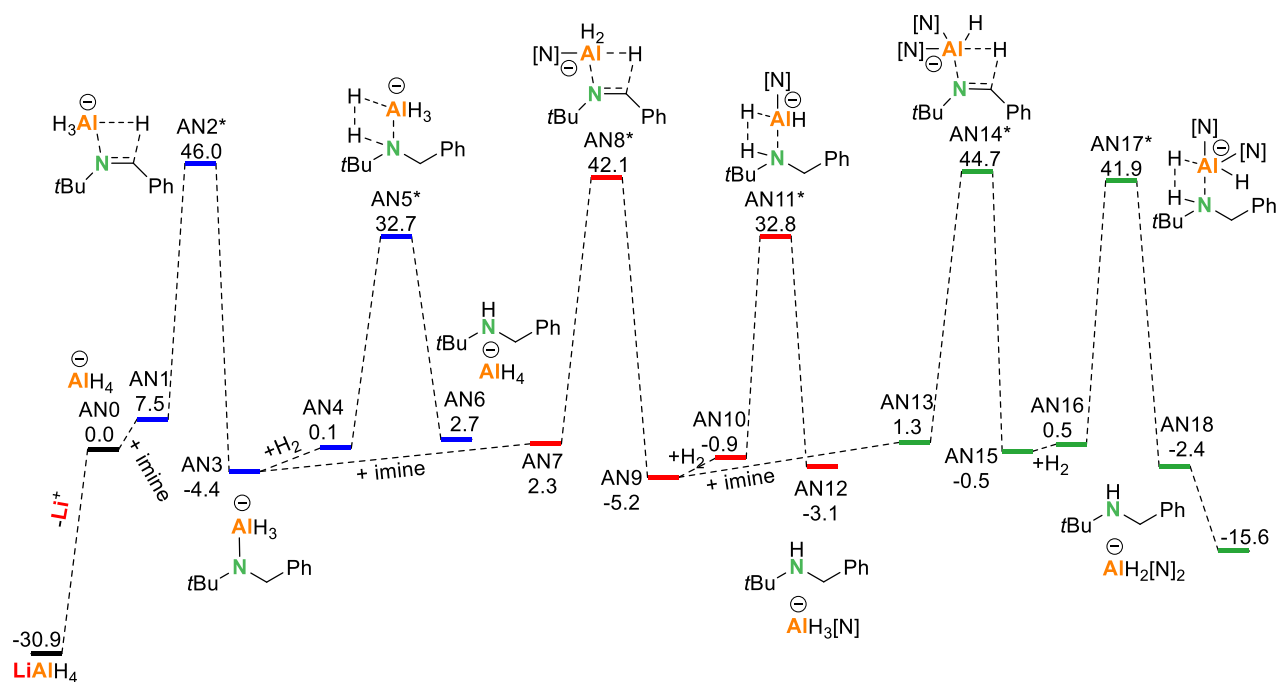

Scheme S5: Full energy profile ( $\Delta G$  (358 K, 6 bar)) for the hydrogenation of PhC(H)=NtBu with the anion AlH<sub>4</sub><sup>-</sup> (B3PW91/6-311++G\*\*(PCM=THF)//6-31+G\*\*).

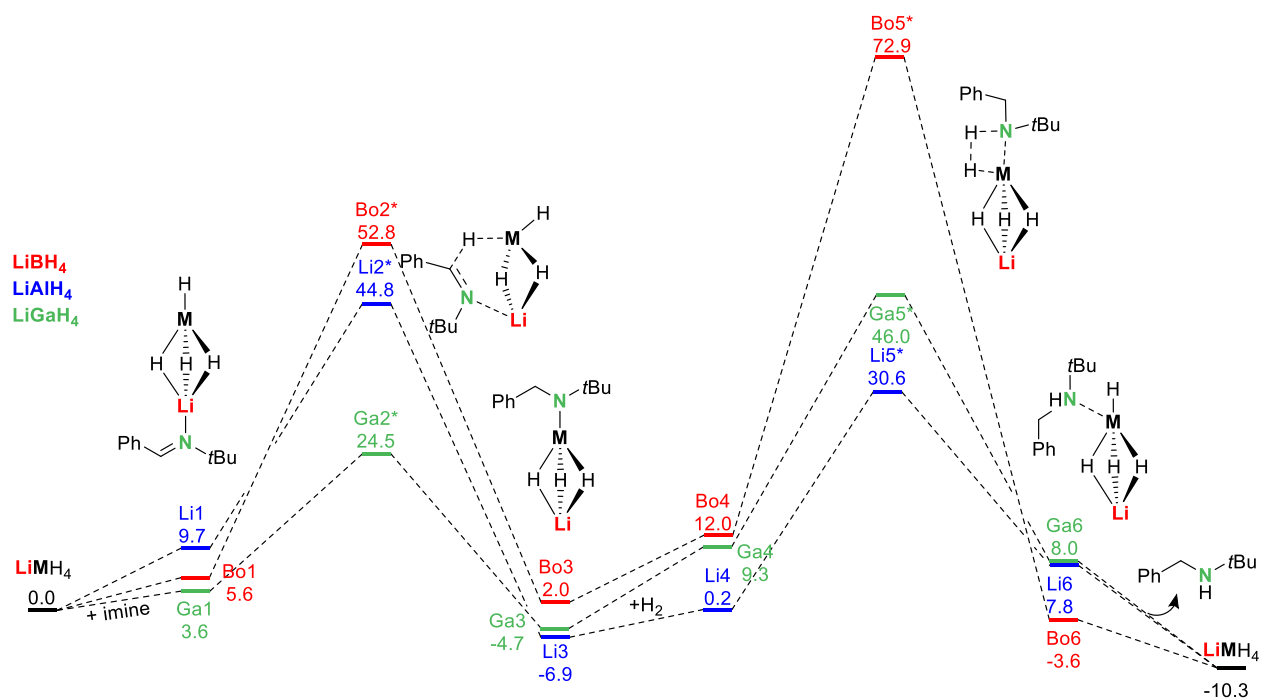

Scheme S6: Comparison of the (half)metal influence on hydrogenation of imines with LiMH<sub>4</sub> catalysts (M = B, Al, Ga); ( $\Delta G$  (358 K, 6 bar)) B3PW91/6-311++G\*\*(PCM=THF)//6-31+G\*\*.

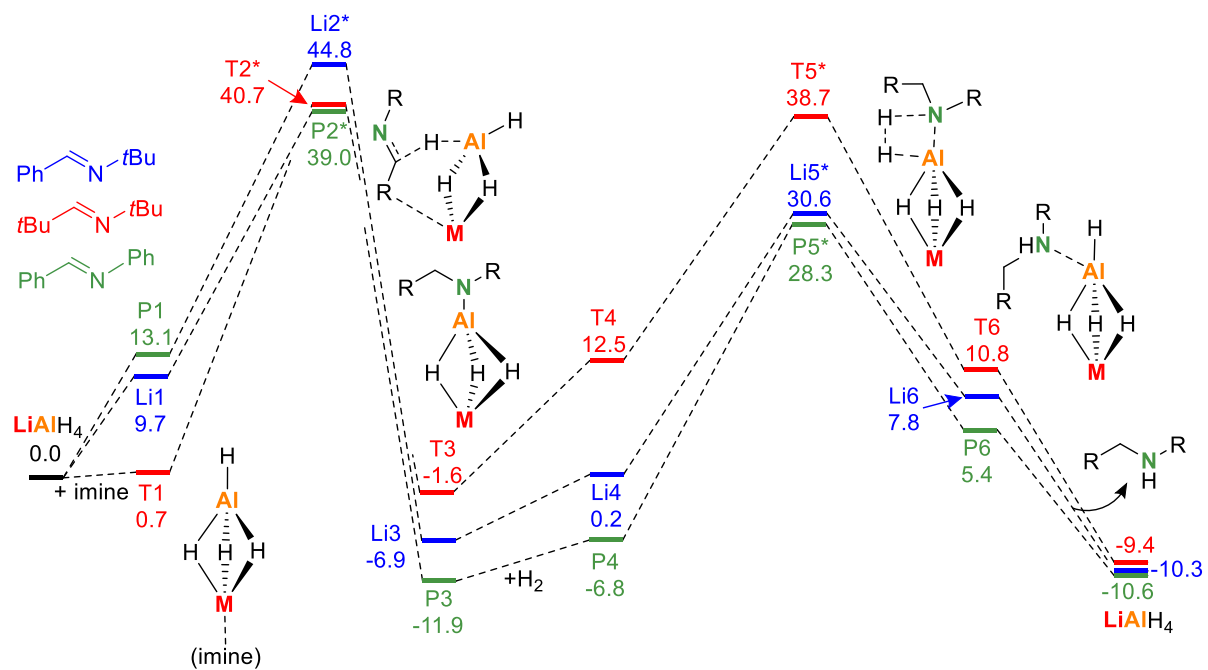

Scheme S7: Comparison of imine substituent effects in hydrogenation with a LiAlH<sub>4</sub> catalyst; ( $\Delta G$  (358 K, 6 bar)) B3PW91/6-311++G\*\* (PCM=THF)//6-31+G\*\*.





|     |           |           |           |    |           |           |           |    |           |            |           |
|-----|-----------|-----------|-----------|----|-----------|-----------|-----------|----|-----------|------------|-----------|
| H   | 2.849931  | 2.997712  | -1.932493 | C  | 6.981613  | 0.105926  | -1.304448 | C  | 3.260889  | 1.936203   | 0.023937  |
| H   | 1.539618  | 2.928911  | -0.731658 | H  | 4.395945  | -1.636483 | 0.994154  | C  | 2.252064  | 1.791316   | 0.990450  |
| H   | 4.926640  | 4.310185  | -0.000125 | H  | 6.811743  | -2.045069 | 1.318483  | C  | 1.361559  | 2.832145   | 1.234744  |
| H   | 5.682940  | 2.825653  | 0.577565  | H  | 8.481670  | -0.928449 | -0.149339 | C  | 1.473402  | 4.032515   | 0.529514  |
| H   | 5.305057  | 3.030742  | -1.151353 | H  | 5.283525  | 1.006812  | -2.271560 | C  | 3.383557  | 3.157360   | -0.656866 |
| H   | 3.089046  | 4.096684  | 1.678245  | H  | 7.701434  | 0.598672  | -1.953195 | C  | 2.489778  | 4.196687   | -0.412677 |
| H   | 2.075789  | 2.647269  | 1.729570  | H  | 2.825624  | -0.962133 | -1.454545 | H  | 2.177303  | 0.887085   | 1.593505  |
| H   | 3.763039  | 2.567628  | 2.278781  | C  | 2.248344  | 1.447863  | 0.871188  | H  | 0.583427  | 2.701964   | 1.980512  |
|     |           |           |           | C  | 1.326866  | 1.342800  | 2.095943  | H  | 0.774475  | 4.841611   | 0.721767  |
|     | 62        |           |           | C  | 3.627477  | 1.934479  | 1.344491  | H  | 4.174955  | 3.284236   | -1.392362 |
| A5  |           |           |           | C  | 1.653887  | 2.476378  | -0.106673 | H  | 2.586117  | 5.132865   | -0.955015 |
| AI  | 0.908979  | 0.406382  | 0.908529  | H  | 1.518937  | 3.441608  | 0.395729  | H  | 5.139502  | 1.82603    | -0.768584 |
| H   | -0.553609 | -0.323943 | 1.357745  | H  | 2.309326  | 2.649374  | -0.966604 | C  | 4.953639  | -1.433091  | -0.394813 |
| H   | 0.167769  | 1.229564  | -0.366937 | H  | 0.684038  | 2.132042  | -0.477773 | C  | 4.249376  | -2.452289  | -1.304787 |
| H   | 3.921450  | -1.540442 | 1.497185  | H  | 3.526854  | 2.901122  | 1.851855  | C  | 6.234157  | -0.938776  | -1.074057 |
| H   | 1.363805  | 1.453059  | 2.034148  | H  | 4.075527  | 1.222551  | 2.044384  | C  | 5.297877  | -2.087695  | 0.953681  |
| Li  | -1.489940 | 0.636987  | 0.103063  | H  | 4.323294  | 2.066562  | 0.511753  | H  | 5.958120  | -2.947195  | 0.798466  |
| C   | 3.533559  | -0.575779 | 1.131474  | H  | 1.258670  | 2.311524  | 2.601881  | H  | 5.805911  | -1.375625  | 1.611726  |
| N   | 2.273776  | -0.736579 | 0.425120  | H  | 0.310169  | 1.049683  | 1.806846  | H  | 4.395674  | -2.435296  | 1.467232  |
| C   | 4.664369  | 0.132817  | 0.389484  | H  | 1.700843  | 0.607048  | 2.814880  | H  | 6.892537  | -1.792343  | -2.581825 |
| C   | 4.409796  | 1.075197  | -0.610769 | H  | 2.386053  | -0.903366 | 1.116725  | H  | 6.030491  | -0.465318  | -2.041114 |
| C   | 5.454422  | 1.762872  | -1.229608 | H  | 1.974562  | -1.755879 | 1.542482  | H  | 6.788992  | -0.232687  | -0.446719 |
| C   | 6.777209  | 1.518509  | -0.858220 | C  | -4.685889 | -0.465616 | -0.217111 | H  | 4.917238  | -3.291513  | -1.529708 |
| C   | 5.995274  | -0.103888 | 0.754227  | N  | -3.701453 | -1.265859 | -0.056785 | H  | 3.352304  | -2.865262  | -0.829311 |
| C   | 7.044372  | 0.579289  | 0.139083  | C  | -4.555018 | 0.997595  | -0.293145 | H  | 3.953009  | -1.993018  | -2.253344 |
| H   | 3.379920  | 1.253817  | -0.908387 | C  | -3.362801 | 1.636547  | -0.669232 |    |           |            |           |
| H   | 5.234557  | 2.491742  | -2.006226 | C  | -3.293530 | 3.026001  | -0.702836 |    | 29        |            |           |
| H   | 7.591517  | 2.051252  | -1.342393 | C  | -4.410176 | 3.795465  | -0.367425 |    |           |            |           |
| H   | 6.213544  | -0.837384 | 1.529361  | C  | -5.679258 | 1.779289  | 0.013581  |    |           |            |           |
| H   | 8.070652  | 0.374789  | 0.434586  | C  | -5.605620 | 3.169732  | -0.012943 | N  | -0.192853 | 0.635106   | 0.466537  |
| H   | 3.347775  | 0.015919  | 2.040442  | H  | -2.494468 | 1.056589  | -0.977604 | C  | -1.093284 | -0.249422  | -0.262015 |
| C   | 2.125499  | -1.966607 | -0.372656 | H  | -2.368278 | 3.509093  | -1.002681 | C  | 1.255373  | 0.276622   | 0.210141  |
| C   | 0.886030  | -1.821590 | -1.265791 | H  | -4.351163 | 4.879806  | -0.395685 | C  | 1.676142  | -1.059555  | 0.218445  |
| C   | 3.334904  | -2.224199 | -1.290235 | H  | -6.612541 | 1.291615  | 0.286210  | C  | 3.016557  | -1.383155  | 0.014994  |
| C   | 1.921521  | -3.191811 | 0.545166  | H  | -6.479795 | 3.763454  | 0.238074  | C  | 3.959720  | -0.376161  | -0.201019 |
| H   | 1.801677  | -4.114468 | -0.036494 | H  | -5.713097 | -0.837660 | -0.292162 | C  | 2.206685  | 1.277120   | -0.014096 |
| H   | 2.777221  | -3.335010 | 1.213745  | C  | -3.903173 | -2.734974 | -0.015000 | C  | 3.550463  | 0.956544   | -0.215154 |
| H   | 1.030057  | -3.052695 | 1.166444  | C  | -2.938882 | -3.323637 | -0.057621 | H  | 0.936977  | -1.839653  | 0.376850  |
| H   | 3.170867  | -3.131154 | -1.884262 | C  | -3.496114 | -3.195871 | 1.394220  | H  | 3.327057  | -2.424861  | 0.024990  |
| H   | 3.491892  | -1.384936 | -1.974234 | C  | -3.496114 | -3.195871 | 1.394220  | H  | 5.004277  | -0.629573  | -0.360921 |
| H   | 4.258647  | -2.366174 | -0.721324 | H  | -5.331771 | -3.196882 | -0.317123 | H  | 1.892893  | 2.318966   | -0.033120 |
| H   | 0.740720  | -2.719323 | -1.876868 | H  | -5.360348 | -4.290170 | -0.304324 | H  | 4.274581  | 1.748183   | -0.389121 |
| H   | -0.019251 | -1.629251 | -0.658093 | H  | -6.051384 | -2.847510 | 0.431662  | C  | -2.545782 | -0.066518  | -0.081554 |
| H   | 0.988614  | -0.960164 | -1.933830 | H  | -5.667791 | -2.871702 | -0.658093 | C  | -3.218774 | -1.053339  | -1.042940 |
| H   | -0.314358 | 1.721730  | 5.514775  | H  | -3.553624 | -4.286914 | 1.461080  | C  | -2.929284 | -0.430232  | 1.358656  |
| H   | -0.712799 | 1.842191  | 6.131512  | H  | -2.468155 | -2.900786 | 1.631498  | C  | -3.022766 | 1.362746   | -0.404253 |
| C   | -4.434289 | 0.790710  | -0.175330 | H  | -4.162673 | -2.769397 | 2.151324  | H  | -4.112683 | 1.439044   | -0.320463 |
| N   | -3.335307 | 1.435026  | -0.056815 | H  | -2.990758 | -4.416859 | -1.041395 | H  | -2.590229 | 2.099822   | 0.280534  |
| C   | -4.553506 | -0.671413 | -0.076718 | H  | -3.196705 | -2.981648 | -2.065065 | H  | -2.744346 | 1.644584   | -1.426851 |
| C   | -3.615684 | -1.470538 | 0.596180  | H  | -1.899301 | -3.041760 | -0.856354 | H  | -4.018094 | -0.418149  | 1.475021  |
| C   | -3.773243 | -2.852356 | 0.636980  |    |           |           |           | H  | -2.564098 | -1.431454  | 1.608007  |
| C   | -4.867950 | -3.454834 | 0.012397  |    | 62        |           |           | H  | -2.518239 | 0.277516   | 2.086093  |
| C   | -5.665047 | -1.284175 | -0.675643 | A7 |           |           |           | H  | -4.308733 | -1.005318  | -0.952184 |
| C   | -5.816827 | -2.667987 | -0.640957 | AI | -0.103670 | -1.591640 | 1.557270  | H  | -2.962032 | -0.0824126 | -2.084733 |
| H   | -2.779076 | -1.020159 | 1.126897  | H  | -0.432462 | -3.111502 | 1.960298  | H  | -2.893493 | -2.076223  | -0.829308 |
| H   | -3.044583 | -3.459012 | 1.166470  | H  | 1.536741  | -1.424590 | 2.105057  | H  | -0.873384 | -0.195967  | -1.253913 |
| H   | -4.986684 | -4.534048 | 0.046909  | H  | -2.164077 | -0.568602 | -1.484093 | H  | -0.332126 | 1.705681   | 0.235705  |
| H   | -6.407169 | -0.670706 | -1.181670 | H  | 0.416367  | -1.315725 | -0.026520 | H  | -0.398222 | 0.522414   | 1.538980  |
| H   | -6.675369 | -3.130939 | -1.118648 | Li | 2.136096  | -1.023093 | 0.488336  |    | 87        |            |           |
| H   | -5.375083 | 1.311765  | -0.380932 | C  | -2.308786 | -0.245094 | -0.449367 | B1 |           |            |           |
| C   | -3.301328 | 2.916088  | -0.148096 | N  | -2.417835 | -1.437161 | 0.405108  | AI | 1.095285  | -0.068903  | -1.401157 |
| C   | -2.555781 | 3.400120  | 1.106070  | C  | -3.441908 | 0.760917  | -0.372925 | H  | 1.139821  | 0.980204   | -2.626290 |
| C   | -2.487252 | 3.261680  | -1.405878 | C  | -3.813426 | 1.314330  | 0.860255  | H  | 0.627833  | 0.736538   | -0.023767 |
| C   | -4.675458 | 3.588392  | -0.220205 | C  | -4.827833 | 2.267182  | 0.941912  | H  | 3.528008  | -1.959895  | 0.682073  |
| H   | -4.538466 | 4.673411  | -0.233355 | C  | -5.483873 | 2.695721  | -0.213542 | H  | -0.326569 | -0.947473  | -1.527622 |
| H   | -5.224112 | 3.323131  | -1.130668 | C  | -4.099291 | 1.208847  | -1.523711 | Li | -1.217491 | 0.117041   | -0.120272 |
| H   | -5.296722 | 3.346339  | 0.649341  | C  | -5.111550 | 2.166802  | -1.448962 | C  | 3.162376  | -0.977383  | 0.342325  |
| H   | -2.366485 | 4.346607  | -1.486613 | H  | -3.291468 | 1.008632  | 1.765411  | N  | 2.621775  | -1.042246  | -0.999724 |
| H   | -1.486342 | 2.817605  | -1.369287 | H  | -5.101309 | 2.681850  | 1.908799  | C  | 4.271293  | 0.041886   | 0.605302  |
| H   | -2.993629 | 2.903954  | -2.308523 | H  | -6.274950 | 3.438054  | -0.151087 | C  | 4.450025  | 1.164378   | -0.207347 |
| H   | -2.447182 | 4.488946  | 1.082520  | H  | -3.818229 | 0.800923  | -2.492696 | C  | 5.430484  | 2.113287   | 0.087469  |
| H   | -3.100934 | 3.128123  | 2.015436  | H  | -5.611742 | 2.496025  | -2.356191 | C  | 6.251479  | 1.955979   | 1.226121  |
| H   | -1.548565 | 2.973092  | 1.167294  | H  | -1.380973 | 0.268479  | -0.163938 | C  | 5.102387  | -0.106587  | 1.723017  |
|     |           |           |           | C  | -3.130154 | -2.626176 | -0.142343 | C  | 6.083444  | 0.837903   | 2.023773  |
|     |           |           |           | C  | -3.422340 | -3.544812 | 1.049965  | H  | 3.820156  | 1.275667   | -1.086315 |
|     |           |           |           | C  | -4.456492 | -2.279549 | -0.839284 | H  | 5.556632  | 2.976804   | -0.561650 |
| A6* |           |           |           | C  | -2.197365 | -3.345960 | -1.123403 | H  | 7.018316  | 2.692102   | 1.431629  |
| AI  | 0.720847  | -1.123705 | 0.199701  | H  | -2.683861 | -4.244491 | -1.158466 | H  | 4.982688  | -0.979152  | 2.364387  |
| H   | -0.400879 | -0.086911 | -0.620778 | H  | -1.937030 | -2.709871 | -1.976558 | H  | 6.722116  | 0.697882   | 2.892748  |
| H   | -0.472210 | -1.444154 | 1.344029  | H  | -1.271141 | -3.637871 | -0.621173 | H  | 2.348801  | -0.727092  | 1.040020  |
| H   | 3.057669  | 0.761504  | -1.618955 | H  | -4.966095 | -3.199884 | -1.146995 | C  | 3.243982  | -2.018015  | -1.910315 |
| H   | 0.941272  | -2.331081 | -0.834500 | H  | -5.125762 | -1.728085 | -0.170545 | C  | 2.674802  | -1.793480  | -3.316938 |
| Li  | -1.785766 | -0.734944 | 0.311705  | H  | -4.304490 | -1.672980 | -1.737168 | C  | 4.774731  | -1.983190  | -1.863490 |
| C   | 3.184095  | -0.073277 | -0.916606 | H  | -3.885617 | -4.475743 | 0.707112  | C  | 2.909404  | -3.464719  | -1.484464 |
| N   | 2.313657  | 0.096298  | 0.256603  | H  | -2.500458 | -3.784387 | 1.586306  | H  | 3.359753  | -0.419598  | -1.176125 |
| C   | 4.667199  | -0.279672 | -0.657745 | H  | -4.118927 | -3.066208 | 1.750119  | H  | 3.279919  | -3.687059  | -0.477881 |
| C   | 5.118347  | -1.141607 | 0.349157  | H  | -2.861759 | -1.170094 | 1.280435  | H  | 1.824385  | -3.613477  | -1.484037 |
| C   | 6.481255  | -1.372435 | 0.531021  | H  | -0.782168 | -0.301535 | 2.267802  | H  | 5.200638  | -2.589699  | -1.848706 |
| C   | 7.419656  | -0.748773 | -0.293547 | C  | 4.201747  | 0.856432  | -0.305727 | H  | 5.045741  | -0.856926  | -2.320560 |
| C   | 5.616306  | 0.335468  | -1.481855 | N  | 3.957639  | -0.381694 | -0.095332 | H  | 5.248408  | -2.025468  | -1.010199 |

|   |           |           |           |   |           |           |           |   |           |           |            |
|---|-----------|-----------|-----------|---|-----------|-----------|-----------|---|-----------|-----------|------------|
| H | 3.088337  | -2.522058 | -4.023094 | H | 4.169564  | -3.414843 | -0.076245 | H | 4.305413  | -2.583931 | -1.647242  |
| H | 1.582878  | -1.913898 | -3.327403 | H | 1.455944  | -5.213603 | -1.844701 | H | 5.143071  | -2.411172 | -0.100400  |
| H | 2.910801  | -0.788418 | -3.680507 | H | 0.144174  | -4.067752 | -1.557031 | H | 2.448975  | -4.907879 | -0.801171  |
| C | -3.009482 | 2.501104  | -1.309413 | H | 1.449613  | -3.650429 | -2.683769 | H | 1.082609  | -3.923065 | -0.269703  |
| N | -2.759504 | 1.245537  | -1.296718 | C | -2.144018 | -1.853015 | 0.604626  | H | 1.957689  | -3.493509 | -1.753546  |
| C | -2.107021 | 3.557293  | -0.827974 | N | -1.739879 | -0.669380 | 1.294553  | C | -1.747270 | -2.354028 | -0.623875  |
| C | -0.711523 | 3.428605  | -0.864606 | C | -3.414727 | -1.782080 | -0.240025 | N | -0.978847 | -1.438636 | 0.236630   |
| C | 0.097099  | 4.467487  | -0.410047 | C | -4.517484 | -1.038263 | 0.193747  | C | -3.254989 | -2.174179 | -0.729039  |
| C | -0.474327 | 5.643704  | 0.078597  | C | -5.710224 | -1.034636 | -0.529194 | C | -3.843624 | -0.931588 | -0.992846  |
| C | -2.673403 | 4.756979  | -0.367110 | C | -5.817979 | -1.766180 | -1.713532 | C | -5.222790 | -0.797662 | -1.140973  |
| C | -1.863222 | 5.789426  | 0.096917  | C | -3.534011 | -2.509626 | -1.430611 | C | -6.052074 | -1.915966 | -1.035282  |
| H | -0.257483 | 2.530832  | -1.272867 | C | -4.721409 | -2.502165 | -2.163714 | C | -4.100713 | -3.286054 | -0.634543  |
| H | 1.176911  | 4.357371  | -0.447142 | H | -4.419962 | -0.461434 | 1.108065  | C | -5.483099 | -3.163833 | -0.785108  |
| H | 0.161296  | 6.451764  | 0.430442  | H | -6.559560 | -0.460089 | -0.166396 | H | -3.216523 | -0.047547 | -1.083887  |
| H | -3.755299 | 4.875306  | -0.367339 | H | -6.744968 | -1.759980 | -2.281113 | H | -5.653560 | 0.179987  | -1.343486  |
| H | -2.311836 | 6.708477  | 0.463603  | H | -2.682538 | -3.081260 | -1.793896 | H | -7.127779 | -1.814306 | -1.149339  |
| H | -3.958570 | 2.879557  | -1.704891 | H | -4.787932 | -3.068333 | -3.089551 | H | -3.667716 | -4.264509 | -0.435541  |
| C | -3.718259 | 0.318571  | -1.955599 | H | -2.272875 | -2.724069 | 1.272604  | H | -6.115074 | -4.044351 | -0.702171  |
| C | -3.900386 | -0.880345 | -1.018890 | C | -1.604470 | -0.820236 | 2.746518  | H | -1.564782 | -3.408219 | -0.364228  |
| C | -5.096083 | 0.914375  | -2.274600 | C | -1.100267 | 0.521941  | 3.293613  | C | -1.164055 | -1.665021 | -1.704347  |
| C | -3.039820 | -0.137954 | -3.258106 | C | -2.945505 | -1.138876 | 3.447593  | C | -2.568399 | -1.256078 | 2.192047   |
| H | -3.647557 | -0.906814 | -3.747763 | C | -0.574223 | -1.898666 | 3.156020  | C | -0.931170 | -3.131008 | 2.115256   |
| H | -2.924390 | 0.704054  | -3.948376 | H | -0.436365 | -1.933095 | 4.244551  | C | -0.139381 | -0.800305 | 2.453471   |
| H | -2.047949 | -0.549584 | -3.052016 | H | -0.886696 | -2.900279 | 2.840871  | H | -0.266369 | -0.914869 | 3.535478   |
| H | -5.731020 | 0.126504  | -2.690569 | H | 0.394144  | -1.689313 | 2.895281  | H | 0.883848  | -1.095537 | 2.399508   |
| H | -5.593949 | 1.301143  | -1.377699 | H | -2.817031 | -1.281360 | 4.528535  | H | -0.255798 | 0.266952  | 2.228347   |
| H | -5.050169 | 1.712643  | -3.022812 | H | -3.658101 | -0.320318 | 3.295237  | H | -0.954986 | -3.225289 | 3.206825   |
| H | -4.582755 | -1.611553 | -1.463441 | H | -3.397060 | -2.054402 | 3.048573  | H | -1.701650 | -3.799899 | 1.179365   |
| H | -2.951602 | -1.397766 | -0.846394 | H | -1.037122 | 0.519674  | 4.387716  | H | 0.044499  | -3.482491 | 1.767899   |
| H | -4.313601 | -0.570517 | -0.053303 | H | -0.094577 | 0.734372  | 2.005333  | H | -2.622372 | -1.333497 | 3.284763   |
| C | -2.009690 | -1.820075 | 2.308037  | H | -1.776697 | 1.336424  | 3.001710  | H | -2.796460 | -0.219398 | 1.919234   |
| N | -1.586905 | -0.670873 | 1.934026  | C | -0.640587 | 3.763068  | -0.559776 | H | -3.354868 | -1.887493 | 1.773882   |
| C | -2.086222 | -3.029178 | 1.475438  | N | -1.538567 | 2.893210  | -0.289836 | C | -1.074476 | 3.489391  | -0.290957  |
| C | -1.294503 | -3.227706 | 0.352668  | C | 0.745325  | 3.705199  | -0.075873 | N | -1.474195 | 2.515783  | -1.017534  |
| C | -1.409223 | -4.405330 | -0.398334 | C | 1.106337  | 3.019742  | 1.092434  | C | -1.100381 | 3.456828  | 1.179667   |
| C | -2.306625 | -5.399663 | -0.003403 | C | 2.433310  | 2.988739  | 1.528405  | C | -2.069612 | 2.720433  | 1.877156   |
| C | -2.966142 | -0.406192 | 1.880401  | C | 3.417386  | 3.642438  | 0.763675  | C | -2.084852 | 2.720453  | 3.269591   |
| C | -3.085895 | -5.219325 | 1.140526  | C | 1.735530  | 4.387161  | -0.798316 | C | -1.132526 | 3.454086  | 3.978967   |
| H | -0.581462 | -2.469847 | 0.024021  | C | 3.065752  | 4.345563  | -0.388605 | C | -0.163878 | 4.212273  | 1.900849   |
| H | -0.788004 | -4.549065 | -1.277438 | H | 0.337853  | 2.545751  | 1.695424  | C | -0.172001 | 4.199795  | 3.292844   |
| H | -2.388700 | -6.317945 | -0.578425 | H | 2.702265  | 2.459229  | 2.417726  | H | -2.834329 | 2.185105  | 1.319844   |
| H | -3.565533 | -3.909242 | 2.778139  | H | 4.454209  | 3.606606  | 1.084477  | H | -2.844533 | 2.154907  | 3.801064   |
| H | -3.777961 | -5.993765 | 1.459016  | H | 1.460782  | 4.938614  | -1.694823 | H | -1.145051 | 3.452888  | 5.065196   |
| H | -2.358928 | -1.978993 | 3.334011  | H | 3.827352  | 4.861140  | -0.966418 | H | 0.582199  | 4.795159  | 1.366128   |
| C | -1.468650 | 0.410117  | 2.950806  | H | -0.860412 | 4.625626  | -1.197916 | H | 0.567571  | 4.774004  | 3.843215   |
| C | -2.034184 | 1.685452  | 2.317116  | C | -2.921179 | 3.067850  | -0.799484 | H | -0.684897 | 4.414167  | -0.292974  |
| C | -2.197261 | 0.148443  | 4.275979  | C | -3.840973 | 2.919238  | 0.421792  | C | -1.537228 | 2.661495  | -2.493712  |
| C | 0.034926  | 0.587825  | 3.218155  | C | -3.198360 | 4.410466  | -1.285165 | C | -3.029684 | 2.785018  | -2.843625  |
| H | 0.198099  | 1.433506  | 3.894768  | C | -3.173994 | 1.924562  | -1.794409 | C | -0.775783 | 3.869140  | -3.052872  |
| H | 0.453941  | -0.311065 | 3.682341  | H | -4.199438 | 1.975162  | -2.173309 | C | -0.964319 | 1.375708  | -3.099386  |
| H | 0.574600  | 0.779079  | 2.286585  | H | -2.487527 | 1.990685  | -2.644663 | H | -1.036959 | 1.405907  | -1.0191076 |
| H | -2.100375 | 1.035242  | 4.909142  | H | -3.056720 | 0.942544  | -1.325716 | H | 0.085578  | 1.237983  | -0.827241  |
| H | -3.267623 | -0.035854 | 4.127123  | H | -4.255629 | 4.452257  | -1.762787 | H | -1.517466 | 0.492818  | -2.762491  |
| H | -1.770797 | -0.689583 | 4.837371  | H | -2.998689 | 5.260116  | -0.822384 | H | -0.829946 | 3.846557  | -4.145134  |
| H | -1.954874 | 2.524414  | 3.015354  | H | -2.619606 | 4.538964  | -2.406600 | H | -1.203219 | 4.825515  | -2.732231  |
| H | -1.475237 | 0.967690  | 1.419804  | H | -4.890195 | 2.950515  | 0.111177  | H | 0.283355  | 3.842706  | -2.774370  |
| H | -3.088682 | 1.561190  | 2.049616  | H | -3.665433 | 1.964062  | 0.926698  | H | -3.157014 | 2.820146  | -3.930500  |
|   |           |           |           | H | -3.668174 | 3.728441  | 1.139346  | H | -3.594064 | 1.928855  | -2.463819  |
|   |           |           |           |   |           |           |           | H | -3.457777 | 3.697659  | -2.415597  |

|     |           |           |           |    |           |           |           |    |           |           |           |
|-----|-----------|-----------|-----------|----|-----------|-----------|-----------|----|-----------|-----------|-----------|
|     | 87        |           |           |    | 87        |           |           |    |           |           |           |
| B2* |           |           |           | B3 |           |           |           | B4 |           |           |           |
| AI  | 0.243670  | -1.283948 | -1.142107 | AI | 0.821777  | -1.104670 | -0.507204 | AI | -1.406604 | -1.054093 | 0.477940  |
| H   | -1.354597 | -2.270848 | -0.109345 | H  | -1.340587 | -2.237555 | -1.637361 | H  | 0.133948  | -3.112605 | 1.480489  |
| H   | -0.510315 | -1.766811 | -2.449524 | H  | 0.587019  | -1.393192 | -2.077786 | H  | -1.423092 | -1.473430 | 2.035197  |
| H   | 2.743476  | -1.921869 | 1.380029  | H  | 3.870133  | -1.082504 | 1.657649  | H  | -4.104947 | -0.231301 | -1.988144 |
| H   | 0.186361  | 0.283373  | -0.809735 | H  | 0.800412  | 0.541372  | -0.264837 | H  | -0.977357 | 0.542553  | 0.353703  |
| Li  | -1.213389 | 0.926138  | 0.438959  | Li | -1.038680 | 0.627599  | -0.138363 | Li | 0.866903  | 0.291025  | 0.176626  |
| C   | 2.519370  | -1.338692 | 0.475267  | C  | 3.281529  | -0.651708 | 0.832588  | C  | -3.514482 | 0.024339  | -1.094662 |
| N   | 1.706694  | -2.108603 | -0.460793 | N  | 2.452998  | -1.654296 | 0.189031  | N  | -3.032403 | -1.165434 | -0.417352 |
| C   | 3.828595  | -0.759440 | -0.050530 | C  | 4.241266  | 0.156800  | -0.040935 | C  | -4.324755 | 1.040031  | -0.288284 |
| C   | 3.964993  | -0.314703 | -1.368452 | C  | 4.018333  | 0.353960  | -1.406412 | C  | -4.192118 | 1.167631  | 1.097359  |
| C   | 5.153006  | 0.268345  | -1.808859 | C  | 4.876112  | 1.151953  | -2.164845 | C  | -4.895858 | 2.148465  | 1.797361  |
| C   | 6.230088  | 0.419236  | -0.934229 | C  | 5.975716  | 1.771060  | -1.569254 | C  | -5.746872 | 3.024495  | 1.122037  |
| C   | 4.915023  | -0.601676 | 0.818141  | C  | 5.349665  | 0.781271  | 0.545201  | C  | -5.183381 | 1.923479  | -0.954553 |
| C   | 6.106258  | -0.018748 | 0.384775  | C  | 6.210229  | 1.581394  | -0.206317 | C  | -5.888689 | 2.907511  | -0.261515 |
| H   | 3.136121  | -0.445617 | -2.059047 | H  | 3.172777  | -0.140994 | -1.877401 | H  | -3.543477 | 0.476763  | 1.629879  |
| H   | 5.239325  | 0.602218  | -2.839960 | H  | 4.687463  | 1.285661  | -3.227572 | H  | -4.782698 | 2.224941  | 2.876268  |
| H   | 7.158900  | 0.856824  | -1.279137 | H  | 6.647184  | 2.387679  | -2.161156 | H  | -6.299517 | 3.784521  | 1.668245  |
| H   | 4.830876  | -0.949984 | 1.846551  | H  | 5.544668  | 0.633508  | 1.606762  | H  | -5.306031 | 1.835289  | -2.033424 |
| H   | 6.940791  | 0.082915  | 1.074212  | H  | 7.068659  | 2.049386  | 0.269740  | H  | -6.555458 | 3.576569  | -0.800273 |
| H   | 1.918919  | -0.488019 | 0.828213  | H  | 2.624204  | 0.089267  | 1.313350  | H  | -2.647033 | 0.579646  | -1.484491 |
| C   | 2.034537  | -3.550132 | -0.582734 | C  | 3.035405  | -3.005181 | 0.078507  | C  | -3.955071 | -2.318014 | -0.399924 |
| C   | 1.222764  | -4.149367 | -1.735853 | C  | 2.075085  | -3.880301 | -0.736479 | C  | -3.325722 | -3.443161 | 0.447341  |
| C   | 3.526184  | -3.775457 | -0.883868 | C  | 4.398468  | -3.003613 | -0.641169 | C  | -5.323433 | -1.972106 | 0.220284  |
| C   | 1.659612  | -4.303240 | 0.708560  | C  | 3.218075  | -3.654747 | 1.467743  | C  | -4.193665 | -2.871711 | -1.822006 |
| H   | 1.889844  | -5.370574 | 0.613766  | C  | 3.612225  | -4.673679 | 1.373402  | H  | -4.851194 | -3.748673 | 2.019140  |
| H   | 2.210242  | -3.928271 | 1.577137  | H  | 3.922125  | -3.094305 | 2.209190  | H  | -4.672287 | -2.133806 | -2.474400 |
| H   | 0.590247  | -4.197741 | 0.916133  | H  | 2.263019  | -3.703969 | 2.000105  | H  | -3.248978 | -3.168615 | -2.288021 |
| H   | 3.721171  | -4.846625 | -1.007639 |    |           |           |           |    |           |           |           |
| H   | 3.822849  | -3.261823 | -1.803085 |    |           |           |           |    |           |           |           |

|              |           |           |           |              |           |           |           |    |           |           |           |
|--------------|-----------|-----------|-----------|--------------|-----------|-----------|-----------|----|-----------|-----------|-----------|
| H            | -5.967414 | -2.859695 | 0.242677  | H            | -5.010546 | -4.138139 | -0.795023 | C  | -3.153486 | -3.467289 | -0.101440 |
| H            | -5.203491 | -1.606272 | 1.244342  | H            | -4.528351 | -2.865613 | -1.922829 | C  | -4.587027 | -1.920644 | 1.238273  |
| H            | -5.846059 | -1.198916 | -0.351483 | H            | -3.288726 | -3.809207 | -1.077837 | C  | -5.313498 | -2.660740 | -1.045463 |
| H            | -3.954342 | -4.328315 | 0.432738  | H            | -6.380533 | -2.596594 | 0.584947  | H  | -5.775232 | -3.568878 | -0.643001 |
| H            | -2.339268 | -3.716949 | 0.060568  | H            | -5.735937 | -1.061660 | 1.200438  | H  | -6.085642 | -1.884859 | -1.055237 |
| H            | -3.206317 | -3.114177 | 1.487770  | H            | -6.060720 | -1.262574 | -0.526025 | H  | -5.009486 | -2.862658 | -2.078861 |
| C            | 0.910137  | -2.718640 | 0.808126  | H            | -4.596075 | -3.846367 | 1.698827  | H  | -5.083262 | -2.788354 | 1.690642  |
| N            | 0.311020  | -1.752777 | -0.135447 | H            | -2.887816 | -3.503857 | 1.416975  | H  | -3.740999 | -1.635764 | 1.870586  |
| C            | 2.002078  | -2.148231 | 1.695537  | H            | -3.876919 | -2.349128 | 2.328354  | H  | -5.300246 | -1.092082 | 1.229060  |
| C            | 1.735688  | -1.049957 | 2.528751  | C            | 1.549570  | -2.816861 | 0.513825  | H  | -3.654590 | -4.324375 | 0.360263  |
| C            | 2.713772  | -0.539384 | 3.382921  | N            | 0.843585  | -1.907675 | -0.399438 | H  | -2.806849 | -3.769481 | -1.095286 |
| C            | 3.982085  | -1.122089 | 3.425947  | C            | 2.525626  | -2.147318 | 1.462336  | H  | -2.277481 | -3.236456 | 0.517865  |
| C            | 3.274834  | -2.727283 | 1.758229  | C            | 2.077977  | -1.227371 | 2.423192  | C  | 0.638568  | -2.531821 | 0.772295  |
| C            | 4.256468  | -2.222978 | 2.614306  | C            | 2.969356  | -0.620600 | 3.309200  | N  | 0.411458  | -1.688506 | -0.420164 |
| H            | 0.727706  | -0.635322 | 2.548990  | C            | 4.329555  | -0.931247 | 3.262869  | C  | 1.704096  | -2.046676 | 1.743764  |
| H            | 2.479799  | 0.302583  | 4.029357  | C            | 3.891892  | -2.455560 | 1.435507  | C  | 1.543823  | -0.814766 | 2.396384  |
| H            | 4.744140  | -0.728825 | 4.093138  | C            | 4.786474  | -1.858087 | 2.325540  | C  | 2.473753  | -0.368501 | 3.335640  |
| H            | 3.498165  | -3.591430 | 1.135582  | H            | 1.011282  | -1.024035 | 2.503416  | C  | 3.588665  | -1.150049 | 3.645628  |
| H            | 5.235918  | -2.693916 | 2.650399  | H            | 2.597210  | 0.080878  | 4.051620  | C  | 2.815720  | -2.827024 | 2.081250  |
| H            | 1.318264  | -3.591147 | 0.284717  | H            | 5.023231  | -0.466104 | 3.957893  | C  | 3.752246  | -2.385332 | 3.018455  |
| C            | 0.589933  | -2.054793 | -1.567737 | H            | 4.258439  | -3.182967 | 0.713941  | H  | 0.645757  | -0.231116 | 2.198892  |
| C            | 2.099427  | -2.109163 | -1.859133 | H            | 5.840925  | -2.121383 | 2.290931  | H  | 2.320170  | 0.583130  | 3.838565  |
| C            | -0.048165 | -3.383153 | -2.016738 | H            | 2.096539  | -3.602690 | -0.023376 | H  | 4.314185  | -0.805690 | 4.377669  |
| C            | -0.015428 | -0.929291 | -2.418152 | C            | 1.109172  | -2.158364 | -1.844854 | H  | 2.949431  | -3.798286 | 1.609721  |
| H            | 0.160522  | -1.117676 | -3.482801 | C            | 2.590858  | -1.047657 | -2.199957 | H  | 4.607103  | -3.011056 | 3.263519  |
| H            | -1.097020 | -0.860303 | -2.263784 | C            | 0.698297  | -3.576377 | -2.307613 | H  | 0.863298  | -3.570035 | 0.493616  |
| H            | 0.433737  | 0.047183  | -2.190115 | C            | 0.276150  | -1.150121 | -2.648391 | C  | 1.103466  | -2.205821 | -1.644983 |
| H            | 0.163380  | -3.583246 | -3.073924 | H            | 0.429422  | -1.293314 | -2.732741 | C  | 2.566596  | -2.596111 | -1.368957 |
| H            | 0.333336  | -4.233727 | -1.442033 | H            | -0.794486 | -1.263304 | -2.445819 | C  | 0.389652  | -3.438603 | -2.232919 |
| H            | -1.132531 | -3.344260 | -1.887231 | H            | 0.553709  | -0.113805 | -2.421634 | C  | 1.132729  | -2.085577 | -2.761424 |
| H            | 2.276536  | -2.296203 | -2.924568 | H            | 0.933707  | -3.714879 | -3.369085 | H  | 1.557961  | -1.456074 | -3.636520 |
| H            | 2.588819  | -1.164949 | -1.599865 | H            | 1.228598  | -4.358707 | -1.754334 | H  | 0.130002  | -0.704412 | -2.907391 |
| H            | 2.600600  | -2.966373 | -1.301309 | H            | -0.375498 | -3.745869 | -2.182448 | H  | 1.778121  | -0.253033 | -2.376977 |
| C            | 2.863203  | 2.600410  | -0.477560 | H            | 2.762445  | -2.105618 | -3.271955 | H  | 0.942471  | -3.837446 | -3.092257 |
| N            | 1.762189  | 2.273639  | 0.087273  | H            | 2.913000  | -0.931958 | -1.951600 | H  | 0.317704  | -4.240427 | -1.489308 |
| C            | 3.924042  | 1.670601  | -0.895104 | H            | 3.238920  | -2.644771 | -1.658711 | H  | -0.619018 | -3.178431 | -2.562455 |
| C            | 4.212048  | 0.489560  | -0.196606 | C            | 2.510980  | 2.749502  | -0.305702 | H  | 3.069663  | -2.823319 | -2.315724 |
| C            | 5.266282  | -0.323127 | -0.603474 | N            | 1.510307  | 2.184961  | -0.858219 | H  | 3.113649  | -1.782806 | -0.885118 |
| C            | 6.038985  | 0.026149  | -1.711314 | C            | 3.682200  | 2.061791  | -0.868777 | H  | 2.650490  | -3.485823 | -0.738762 |
| C            | 4.726691  | 2.303482  | -1.989758 | C            | 4.186929  | 0.872162  | -0.326537 | C  | 2.992873  | 2.674446  | -0.575889 |
| C            | 5.766401  | 1.205368  | -2.407450 | C            | 5.341816  | 0.300206  | -0.855405 | N  | 1.810697  | 2.343382  | -0.213924 |
| H            | 3.634478  | 0.224896  | 0.686159  | C            | 5.996544  | 0.898614  | -1.932314 | C  | 4.117554  | 1.749369  | -0.778957 |
| H            | 5.484346  | -1.228611 | -0.046470 | C            | 4.364507  | 2.674231  | -1.932702 | C  | 4.267236  | 0.573393  | -0.031036 |
| H            | 6.860436  | -0.612243 | -2.024585 | C            | 5.504101  | 2.087593  | -2.474248 | C  | 5.387056  | -0.234496 | -0.216345 |
| H            | 4.525012  | 2.958714  | -2.519831 | C            | 3.699923  | 0.414983  | 0.530347  | C  | 6.359683  | 0.113960  | -1.154260 |
| H            | 6.370276  | 1.485925  | -3.265673 | H            | 5.729690  | -0.614291 | -0.418168 | C  | 5.117156  | 2.108937  | -1.697445 |
| H            | 3.092314  | 3.649932  | -0.689331 | H            | 6.895923  | 0.446499  | -2.341235 | C  | 6.222391  | 1.287591  | -1.898140 |
| C            | 0.835724  | 3.365078  | 0.517726  | H            | 3.991149  | 3.611233  | -2.340157 | H  | 5.352522  | 0.312983  | 0.726186  |
| C            | 0.322723  | 2.966503  | 1.908532  | H            | 6.014564  | 2.561527  | -3.307786 | H  | 5.499310  | -1.134071 | 0.381024  |
| C            | 1.484223  | 4.753401  | 0.610800  | H            | 2.559295  | 3.840432  | -0.394753 | H  | 7.230129  | -0.520610 | -1.295853 |
| C            | -0.324726 | 3.412111  | -0.487320 | C            | 0.459092  | 3.065011  | -0.854885 | H  | 5.018954  | 3.033489  | -2.262123 |
| H            | -1.060621 | 4.158936  | -0.172758 | C            | 0.966907  | 4.453989  | 1.272697  | H  | 6.981273  | 1.567200  | -2.623290 |
| H            | 0.038066  | 3.684697  | -1.484485 | C            | -0.667079 | 3.221229  | -0.177141 | H  | 3.248254  | 3.724591  | -0.477484 |
| H            | -0.834017 | 2.446439  | -0.544323 | C            | -0.050925 | 2.338625  | 2.105847  | C  | 0.815525  | 3.431353  | 0.030282  |
| H            | 0.760399  | 5.446538  | 1.049082  | H            | -0.852271 | 2.915855  | 2.577549  | C  | 1.442713  | 4.785858  | 0.392471  |
| H            | 2.371040  | 4.748194  | 1.254822  | H            | -0.458973 | 1.355042  | -0.254208 | C  | -0.036236 | 3.582803  | -1.239169 |
| H            | 1.760545  | 5.164273  | -0.366253 | H            | 0.755535  | 2.210428  | 2.835376  | C  | -0.051447 | 2.960761  | 1.204985  |
| H            | -0.390723 | 3.712038  | 2.273538  | H            | -1.490546 | 3.802653  | 0.248968  | H  | -0.833151 | 3.696901  | 1.416121  |
| H            | -0.196233 | 2.004189  | 1.875415  | H            | -0.301436 | 3.743402  | -1.068330 | H  | -0.550821 | 2.013477  | 0.978312  |
| H            | 1.149825  | 2.903468  | 2.623693  | H            | -1.065361 | 2.249146  | -0.477494 | H  | 0.554694  | 2.835567  | 2.108672  |
| H            | 1.318724  | 4.178778  | -5.909018 | H            | 0.179234  | 4.959815  | 1.838876  | H  | -0.822350 | 4.326551  | -1.072902 |
| H            | 1.555820  | 3.480052  | -6.004025 | H            | 1.850523  | 4.382968  | 1.916936  | H  | 0.581765  | 3.916669  | -2.080066 |
|              |           |           |           | H            | 1.204106  | 5.100668  | 0.421600  | H  | -0.515807 | 2.637320  | -1.506704 |
|              |           |           |           | H            | -0.504593 | -2.697851 | -0.240085 | H  | 0.646546  | 5.469403  | 0.701739  |
|              |           |           |           | H            | -1.239519 | -3.096427 | -0.008222 | H  | 2.147729  | 4.693950  | 1.226408  |
|              |           |           |           |              |           |           |           | H  | 1.955156  | 5.262470  | -0.449766 |
| B5*-Bridging |           |           |           |              |           |           |           | H  | -2.552128 | -1.475331 | -1.825415 |
| Al           | -1.515263 | -1.261285 | 0.470298  |              |           |           |           | H  | -1.689872 | -1.401191 | -2.326567 |
| H            | 0.808426  | -3.360471 | 1.134488  |              |           |           |           |    |           |           |           |
| H            | -1.072498 | -1.494851 | 1.986032  |              |           |           |           |    |           |           |           |
| H            | -4.251425 | -0.717320 | -1.883021 | B5*-Terminal |           |           |           |    |           |           |           |
| H            | -0.965268 | 0.160253  | -0.104061 | Al           | -1.363101 | -0.842841 | -0.416612 |    |           |           |           |
| Li           | 0.915431  | 0.072385  | 0.043845  | H            | -0.290409 | -2.574272 | 1.354089  |    |           |           |           |
| C            | -3.660481 | -0.264605 | -1.070537 | H            | -1.412065 | -0.699946 | 1.212535  | B6 |           |           |           |
| N            | -3.277445 | -1.249832 | -0.074045 | H            | -4.892427 | -0.326082 | -1.962383 | Al | 0.963355  | -1.450026 | -0.825110 |
| C            | -4.408999 | 0.972857  | -0.579460 | H            | -0.926482 | 0.654540  | -0.936335 | H  | 0.301977  | -0.550719 | 0.404802  |
| C            | -4.332315 | 1.405055  | 0.746742  | Li           | 0.915568  | 0.387987  | -0.327843 | H  | 0.779444  | -0.284201 | -0.200977 |
| C            | -4.975561 | 2.573619  | 1.158215  | C            | -4.054274 | -0.004556 | -1.328604 | H  | -3.574420 | 0.359202  | 0.446484  |
| C            | -5.705836 | 3.335037  | 0.245183  | N            | -3.333861 | -1.158389 | -0.799599 | Li | -0.515946 | 0.707552  | -0.913010 |
| C            | -5.146687 | 1.743657  | -1.486900 | C            | -4.575153 | 1.050071  | -0.365918 | C  | -2.886591 | -0.486163 | 0.350318  |
| C            | -5.789116 | 2.913833  | -1.083404 | C            | -3.920946 | 1.368419  | 0.829576  | N  | -2.323419 | -0.480693 | -1.015138 |
| H            | -3.775775 | 0.799952  | 1.457466  | C            | -4.403785 | 2.382598  | 1.656672  | C  | -3.562614 | -1.749898 | 0.852993  |
| H            | -4.911316 | 2.886990  | 2.197757  | C            | -5.547428 | 3.101167  | 1.304055  | C  | -2.936456 | -2.998086 | 0.742306  |
| H            | -6.211615 | 4.242106  | 0.565659  | C            | -5.725110 | 1.773322  | -0.706680 | C  | -3.541522 | -4.144275 | 1.256721  |
| H            | -5.223487 | 1.419274  | -2.523940 | C            | -6.208555 | 2.791698  | 0.115538  | C  | -4.776997 | -0.061816 | 1.901200  |
| H            | -6.361820 | 3.492920  | -1.803780 | H            | -3.041447 | 0.800187  | 1.123668  | C  | -4.796410 | -1.677800 | 1.509329  |
| H            | -2.750751 | 0.111789  | -1.562040 | H            | -3.887027 | 2.606870  | 2.586745  | C  | -5.402069 | -2.821954 | 2.030221  |
| C            | -4.265253 | -2.321484 | 0.185500  | H            | -5.924090 | 3.887610  | 1.952800  | H  | -1.966472 | -3.079170 | 0.254792  |
| C            | -3.880773 | -3.044971 | 1.483039  | H            | -6.252141 | 1.534063  | -1.628868 | H  | -3.041510 | -5.104246 | 1.158737  |
| C            | -5.691710 | -1.771663 | 0.369630  | H            | -7.105640 | 3.336110  | -1.628650 | H  | -5.246454 | -4.956132 | 3.201806  |
| C            | -4.274359 | -3.344338 | -0.970463 | H            | -3.349566 | 0.493467  | -2.017687 | H  | -5.293098 | -0.714459 | 1.611214  |
|              |           |           |           | C            | -4.104986 | -2.263842 | -0.181003 | H  | -6.363104 | -2.744317 | 2.532098  |

|     |           |           |           |    |           |           |           |              |           |           |           |
|-----|-----------|-----------|-----------|----|-----------|-----------|-----------|--------------|-----------|-----------|-----------|
| H   | -2.050454 | -0.275683 | 1.028155  | H  | -3.364375 | -2.804450 | -1.378614 | H            | 5.737674  | -0.613474 | 1.977549  |
| C   | -3.272532 | -0.336033 | -2.159772 | H  | -5.749312 | -2.293102 | -1.784427 | H            | 7.417473  | 1.112367  | 1.420162  |
| C   | -2.453834 | -0.591964 | -3.430309 | H  | -1.611392 | -3.157548 | 0.113660  | H            | 2.722104  | -0.482635 | 1.912333  |
| C   | -4.443877 | -1.331194 | -2.124627 | C  | -0.203064 | -1.258572 | 2.302670  | C            | 2.575075  | -2.462614 | -0.758852 |
| C   | -3.819024 | 1.096322  | -2.178646 | C  | 0.735111  | -0.051392 | 2.232484  | C            | 1.555243  | -2.690981 | -1.872574 |
| H   | -4.446462 | 1.248407  | -3.063000 | C  | -1.132183 | -1.059795 | 3.512373  | C            | 3.945984  | -2.262216 | -1.436987 |
| H   | -4.437834 | 1.311686  | -3.013400 | C  | 0.630507  | -2.534651 | 2.518904  | C            | 2.628352  | -3.758582 | 0.082281  |
| H   | -3.003542 | 1.826246  | -2.208159 | H  | 1.266124  | -2.437458 | 3.405928  | H            | 2.954453  | -4.607411 | -0.530753 |
| H   | -5.046869 | -1.223705 | -3.033406 | H  | 0.001625  | -3.419238 | 2.666779  | H            | 3.327360  | -3.678793 | 0.920604  |
| H   | -4.085274 | -2.364079 | -2.075992 | H  | 1.273307  | -2.716639 | 1.652914  | H            | 1.640398  | -3.990357 | 0.490603  |
| H   | -5.101421 | -1.165429 | -1.267449 | H  | -0.541865 | -0.990065 | 4.432249  | H            | 4.175939  | -3.118520 | -2.082099 |
| H   | -3.082058 | -0.469678 | -4.318342 | H  | -1.707933 | -0.130545 | 3.421330  | H            | 3.947870  | -1.355986 | -0.050217 |
| H   | -1.610419 | 0.099169  | -3.510208 | H  | -1.830639 | -1.892843 | 3.644627  | H            | 4.758061  | -2.171385 | -0.710288 |
| H   | -2.050400 | -1.610300 | -3.438156 | H  | 1.288577  | 0.062723  | 3.169840  | H            | 1.813545  | -3.583641 | -2.452462 |
| H   | -1.806973 | -1.355718 | -1.147608 | H  | 1.483182  | -0.171651 | 1.442543  | H            | 0.553641  | -2.855845 | -1.461207 |
| H   | -0.107630 | -2.619580 | -1.208636 | H  | 0.180955  | 0.876334  | 2.056370  | H            | 1.529763  | -1.843294 | -2.562310 |
| C   | -0.641005 | 3.620629  | -0.052818 | Li | -2.349287 | 0.229950  | 0.707601  | H            | -1.702830 | -3.191487 | 0.317872  |
| N   | -0.143027 | 2.818723  | -0.916713 | C  | -0.518579 | 1.847932  | -0.791157 | C            | -1.762506 | -2.140497 | -0.001826 |
| C   | -1.215954 | 3.204582  | 1.236275  | N  | -1.863519 | 1.582638  | -0.435735 | N            | -1.134130 | -1.229578 | 0.956869  |
| C   | -0.748612 | 2.077733  | 1.928101  | C  | 0.221369  | 3.016951  | -0.125149 | C            | -3.212226 | -1.843952 | -0.395304 |
| C   | -1.290274 | 1.742901  | 3.166796  | C  | -0.220796 | 3.543735  | 1.090115  | C            | -3.985036 | -0.838475 | 0.194886  |
| C   | -2.301752 | 2.525150  | 3.726878  | C  | 0.469851  | 4.585191  | 1.709871  | C            | -5.280543 | -0.555541 | -0.252121 |
| C   | -2.210928 | 4.003510  | 1.821238  | C  | 1.616735  | 5.117372  | 1.118534  | C            | -5.831767 | -1.286625 | -1.299692 |
| C   | -2.762223 | 3.657542  | 3.051922  | C  | 1.368495  | 3.561218  | -0.714039 | C            | -3.787852 | -2.573473 | -1.447082 |
| H   | 0.057910  | 1.479377  | 1.511795  | C  | 2.063207  | 4.603410  | -0.100120 | C            | -0.979053 | -2.305557 | -1.891258 |
| H   | -0.913776 | 0.874100  | 3.698989  | H  | -1.133588 | 3.135248  | 1.517522  | H            | -3.602875 | -0.307506 | 1.067511  |
| H   | -2.720370 | 2.261071  | 4.694040  | H  | 0.109699  | 4.987743  | 2.653751  | H            | -5.857217 | 0.228822  | 0.231026  |
| H   | -2.557923 | 4.894597  | 1.302514  | H  | 2.153710  | 5.931454  | 1.598166  | H            | -6.837140 | -1.072274 | -1.650433 |
| H   | -3.541145 | 4.275203  | 3.489931  | H  | 1.713731  | 3.173712  | -1.671866 | H            | -3.207214 | -3.359492 | -1.926726 |
| H   | -0.653651 | 4.702386  | -0.223941 | H  | 2.947977  | 5.019785  | -0.575355 | H            | -5.499781 | -2.887371 | -0.720705 |
| C   | 0.553071  | 3.363254  | -2.111775 | H  | -0.323684 | 1.917049  | -1.879778 | H            | -1.207719 | -2.127807 | -0.945844 |
| C   | 2.026078  | 2.951629  | -1.955939 | C  | -2.863475 | 2.236286  | -1.290124 | C            | -1.202493 | -1.747931 | 3.376862  |
| C   | -0.041731 | 2.672992  | -3.345444 | C  | -4.230470 | 1.956723  | -0.652098 | C            | -1.119117 | -0.580349 | 3.369769  |
| C   | 0.458227  | 4.883328  | -2.285588 | C  | -2.689570 | 3.767065  | -1.387578 | C            | -2.515272 | -2.490538 | 2.705408  |
| H   | 0.985890  | 5.165437  | -3.201272 | C  | -2.878001 | 1.653033  | -2.721851 | C            | -0.041764 | -2.720853 | 2.647253  |
| H   | -0.578402 | 5.224785  | -2.387785 | H  | -3.659466 | 2.116635  | -3.337281 | H            | -0.076086 | -3.102102 | 3.674778  |
| H   | 0.929845  | 5.430006  | -1.461719 | H  | -1.924477 | 1.819826  | -3.236243 | H            | -0.090430 | -3.583455 | 1.973512  |
| H   | 0.479025  | 3.005330  | -4.249135 | H  | -3.053272 | 0.572866  | -2.686652 | H            | 0.925951  | -2.233741 | 2.494064  |
| H   | 0.079702  | 1.586871  | -3.278523 | H  | -3.486756 | 4.215411  | -1.994154 | H            | -2.472413 | -2.822808 | 3.747992  |
| H   | -1.104561 | 2.910409  | -3.459599 | H  | -2.715086 | 4.223534  | -0.392710 | H            | -3.393471 | -1.847738 | 2.605911  |
| H   | 2.596483  | 3.262847  | -2.837550 | H  | -1.734255 | 4.036736  | -1.851169 | H            | -2.677931 | -3.384315 | 2.096560  |
| H   | 2.470010  | 3.420421  | -1.072087 | H  | -5.046966 | 2.409498  | -1.226430 | H            | -1.118615 | -0.961137 | 4.397219  |
| H   | 2.113223  | 1.866380  | -1.854420 | H  | -4.427587 | 0.877507  | -0.607571 | H            | -0.213651 | 0.011231  | 3.232605  |
| H   | 3.458201  | -2.763014 | 1.449057  | H  | -4.265046 | 2.364524  | 0.366052  | H            | -1.992524 | 0.075552  | 3.267046  |
| C   | 3.070875  | -1.815214 | 1.039723  | C  | 2.638237  | -0.188997 | -1.001205 | Li           | -1.877432 | 0.521247  | 0.193521  |
| N   | 2.682146  | -1.947826 | -0.351009 | C  | 1.925884  | -2.305255 | -1.122212 | C            | 0.176082  | 2.383141  | -0.272343 |
| C   | 4.076641  | -0.718080 | 1.383642  | C  | 3.920642  | -0.396609 | -0.200089 | N            | -0.204285 | 1.041235  | -0.797506 |
| C   | 4.289273  | 0.375308  | 0.541328  | H  | 2.930259  | 0.139290  | -0.101277 | C            | -0.976527 | 3.194959  | 0.358189  |
| C   | 5.170451  | 1.396515  | 0.900752  | H  | 2.155012  | 0.696418  | -0.564039 | C            | -1.608111 | 2.632843  | 1.501367  |
| C   | 5.854374  | 1.342154  | 2.115663  | C  | 1.556381  | -1.775953 | -3.513697 | C            | -2.681102 | 3.294187  | 1.102666  |
| C   | 4.769960  | -0.763801 | 2.599882  | C  | 3.391102  | -2.769778 | -2.137347 | C            | -3.138055 | 4.502712  | 2.126666  |
| C   | 5.650067  | 0.253949  | 2.966404  | C  | 1.061933  | -3.535221 | -1.792350 | C            | -1.430579 | 4.377812  | -1.136519 |
| H   | 3.762618  | 0.398422  | -0.408718 | H  | 1.222999  | -4.324540 | -2.534683 | C            | -2.498684 | 5.046992  | 0.462414  |
| H   | 5.328649  | 2.235611  | 0.226936  | H  | 1.314180  | -3.936600 | -0.804994 | H            | -1.198161 | 1.737794  | 1.969209  |
| H   | 6.544192  | 2.134433  | 2.394690  | H  | -0.010502 | -3.300520 | -1.818701 | H            | -3.140843 | 2.878331  | 2.995906  |
| H   | 4.621913  | -1.612146 | 3.267052  | H  | 1.761104  | -2.526488 | -1.285337 | H            | -3.970656 | 5.024089  | 2.040786  |
| H   | 6.182624  | 0.194750  | 3.912625  | H  | 0.495312  | -1.512487 | -3.564984 | H            | -0.940971 | 4.821398  | -1.000100 |
| H   | 2.173188  | -1.600935 | 1.640371  | H  | 2.140584  | -0.883491 | -3.763401 | H            | -2.832756 | 5.998325  | 0.056334  |
| C   | 3.463767  | -2.899788 | -1.163940 | H  | 3.510192  | -3.543112 | -1.504625 | H            | 0.626709  | 3.003957  | -1.054555 |
| C   | 3.063545  | -2.701488 | -2.632203 | H  | 4.081073  | -1.957163 | -2.381734 | C            | -0.343523 | 1.059763  | -2.287974 |
| C   | 4.979635  | -2.661892 | -1.046464 | H  | 3.695871  | -3.190770 | -1.175876 | C            | -1.001218 | -0.236732 | -2.760362 |
| C   | 3.151360  | -4.359201 | -0.766507 | C  | 5.020122  | 0.432273  | -0.457282 | C            | -1.260921 | 2.201114  | -2.772934 |
| H   | 3.720629  | -5.071174 | -1.376895 | C  | 6.191563  | 0.328174  | 0.291119  | C            | 1.022629  | 1.199442  | -2.986123 |
| H   | 3.406657  | -4.550816 | 0.281694  | C  | 6.285931  | -0.614888 | 1.315943  | H            | 0.909530  | 1.196521  | -4.076724 |
| H   | 2.083888  | -4.566082 | -0.897648 | C  | 4.028199  | -1.335973 | 0.827008  | H            | 1.521938  | 2.135740  | -2.715454 |
| H   | 5.523735  | -3.370535 | -1.682027 | C  | 5.198673  | -1.447646 | -1.889202 | H            | 1.685215  | 0.370651  | -2.705259 |
| H   | 5.241256  | -1.646297 | -1.358352 | H  | 4.958273  | 1.168789  | -1.256902 | H            | -1.435363 | 2.102054  | -3.850034 |
| H   | 5.337524  | -2.798220 | -0.020991 | H  | 7.032893  | 0.980422  | 0.071193  | H            | -2.235080 | 2.171952  | -2.271270 |
| H   | 3.609161  | -3.394821 | -3.281935 | H  | 7.198751  | -0.702067 | 1.898948  | H            | -0.828018 | 3.190481  | -2.629347 |
| H   | 1.992857  | -2.893921 | -2.784462 | H  | 3.187171  | -1.993510 | 1.021109  | H            | -1.079802 | -0.240928 | -3.856370 |
| H   | 3.280424  | -1.678638 | -2.957917 | H  | 5.261664  | -2.190219 | 2.370754  | H            | -0.418098 | -1.114243 | -2.483831 |
|     | 87        |           |           |    | 87        |           |           | H            | -2.017135 | -0.342918 | -2.367310 |
| C1* |           |           |           | C2 |           |           |           |              |           |           |           |
| Al  | -0.119389 | -1.013292 | -0.647857 | Al | 0.574730  | -0.370735 | 0.383818  | C3*-Terminal |           |           |           |
| H   | -1.192982 | -1.278916 | -1.778741 | H  | 0.946274  | 2.266656  | 0.498097  | Al           | 0.142018  | -0.215064 | 0.825939  |
| H   | 0.147812  | 0.965940  | -0.481707 | H  | 0.934223  | 0.549077  | 1.645437  | H            | 0.585510  | 2.321696  | 1.251040  |
| N   | 1.668760  | -1.276185 | -1.059098 | H  | 3.754074  | -1.790161 | 1.398677  | H            | 0.166742  | 0.591894  | 2.220985  |
| C   | -1.878179 | -3.043560 | 1.830889  | C  | 3.212329  | -0.908348 | 1.260338  | H            | 3.414856  | 0.398006  | 1.632105  |
| C   | -1.912390 | -2.457804 | 0.906722  | N  | 2.182201  | -1.294659 | 0.059451  | C            | 3.006986  | 0.048456  | 0.672157  |
| N   | -0.969797 | -1.306723 | 1.019941  | C  | 4.252731  | 0.122372  | 0.600598  | N            | 2.024142  | -1.018054 | 0.874182  |
| C   | -3.363750 | -2.080756 | 0.647439  | C  | 3.978617  | 1.104500  | -0.353980 | C            | 4.168258  | -0.218845 | -0.276062 |
| C   | -4.154096 | -1.488156 | 1.646488  | C  | 4.923671  | 2.080932  | -0.672276 | C            | 4.067802  | -1.096929 | -1.359434 |
| C   | -5.499337 | -1.191333 | 1.418455  | C  | 6.165450  | 2.093502  | -0.036705 | C            | 5.130732  | -1.246325 | -2.274469 |
| C   | -6.081025 | -1.484773 | 0.185674  | C  | 5.502943  | 0.145321  | 1.232172  | C            | 6.316213  | -0.549386 | -2.069856 |
| C   | -3.962480 | -2.357837 | -0.588892 | C  | 6.451835  | 1.118536  | 0.920393  | C            | 5.363520  | 0.491266  | -0.107555 |
| C   | -5.307308 | -2.067946 | -0.817794 | H  | 3.017724  | 1.085179  | -0.858871 | C            | 6.428712  | 0.331332  | -0.993676 |
| H   | -3.726113 | -1.287778 | 2.625651  | H  | 4.690281  | 2.833908  | -1.421507 | H            | 3.152795  | -1.666402 | -1.499776 |
| H   | -6.093432 | -0.741548 | 2.209308  | H  | 6.903320  | 2.851451  | -0.286050 | H            | 5.032112  | -1.954595 | -3.080688 |
| H   | -7.127821 | -1.256471 | 0.006955  |    |           |           |           |              |           |           |           |



|    |           |           |           |    |           |           |           |    |           |           |           |
|----|-----------|-----------|-----------|----|-----------|-----------|-----------|----|-----------|-----------|-----------|
| N  | -3.995632 | 1.376409  | 0.424850  | H  | 5.308732  | -0.317100 | 1.210104  | H  | -0.826745 | -0.783678 | 1.347517  |
| C  | -5.121539 | -0.905919 | 0.796436  | H  | 0.475536  | 1.526132  | -0.001759 | H  | -4.962782 | 1.146082  | 1.035131  |
| C  | -4.254002 | -1.786245 | 0.136043  | Li | -0.905513 | 0.448633  | -0.234249 | Li | 0.826227  | -0.388566 | 0.409661  |
| C  | -4.707583 | -3.016166 | -0.336220 | C  | 4.233112  | -0.110532 | 1.172179  | C  | -4.257958 | 1.037571  | 0.192637  |
| C  | -6.040190 | -3.393051 | -0.152118 | N  | 3.563762  | -0.934016 | 0.173047  | N  | -3.608180 | -0.265829 | 0.204023  |
| C  | -6.450827 | -1.299265 | 0.982727  | C  | 4.048585  | 1.365545  | 0.889893  | C  | -3.258833 | 2.174377  | 0.285348  |
| C  | -6.911370 | -2.531090 | 0.512356  | C  | 2.859472  | 1.801540  | 0.280688  | C  | -1.884484 | 1.864420  | 0.296259  |
| H  | -3.213129 | -1.506067 | -0.013494 | C  | 2.746826  | 3.144630  | -0.094262 | C  | -0.987118 | 2.939990  | 0.411126  |
| H  | -4.017680 | -3.684944 | -0.844482 | C  | 3.779120  | 4.055567  | 0.128318  | C  | -1.420723 | 4.262844  | 0.498338  |
| H  | -6.393761 | -4.352279 | -0.520786 | C  | 5.070134  | 2.286417  | 1.143279  | C  | -3.705761 | 3.500357  | 0.360743  |
| H  | -7.137119 | -0.632168 | 1.501593  | C  | 4.941740  | 3.623813  | 0.766339  | C  | -2.789964 | 4.544098  | 0.466950  |
| H  | -7.949711 | -2.814995 | 0.664582  | H  | 1.572531  | 1.494503  | 0.229109  | H  | 0.086919  | 2.753648  | 0.443191  |
| H  | -3.863619 | 0.212112  | 2.107321  | H  | 1.814295  | 3.478015  | -0.549885 | H  | -0.700275 | 5.073025  | 0.590421  |
| C  | -4.778389 | 2.041722  | -0.630621 | H  | 3.676149  | 5.091630  | -0.184642 | H  | -4.773615 | 3.717022  | 0.343197  |
| C  | -3.861728 | 3.135288  | -1.198618 | H  | 5.991217  | 1.946437  | 1.614413  | H  | -3.139188 | 5.571964  | 0.531487  |
| C  | -5.210289 | 1.110259  | -1.781506 | H  | 5.754398  | 4.320874  | 0.955296  | H  | -4.867649 | 1.188786  | -0.718271 |
| C  | -6.016224 | 2.702555  | -0.013082 | H  | 3.867409  | -0.332166 | 2.194265  | C  | -4.498821 | -1.398250 | 0.469609  |
| H  | -6.513966 | 3.333103  | -0.757195 | C  | 4.435437  | -1.874334 | -0.553442 | C  | -3.710329 | -2.695708 | 0.273039  |
| H  | -6.748878 | 1.963214  | 0.326963  | C  | 3.576529  | -2.706929 | -1.511098 | C  | -5.018736 | -1.381944 | 1.925069  |
| H  | -5.733474 | 3.330631  | 0.838591  | C  | 5.500973  | -1.132085 | -1.389148 | C  | -5.702835 | -1.418270 | -0.493926 |
| H  | -5.721559 | 1.679462  | -2.567640 | C  | 5.134121  | -2.855471 | 0.410851  | H  | -6.312356 | -2.315558 | -0.335125 |
| H  | -4.338050 | 0.623007  | -2.231629 | H  | 5.742559  | -3.577415 | -0.146730 | H  | -6.354550 | -0.550751 | -0.347892 |
| H  | -5.889496 | 0.326911  | -1.435716 | H  | 5.801721  | -2.343765 | 1.111831  | H  | -5.360371 | -1.414347 | -1.534722 |
| H  | -4.361075 | 3.686117  | -2.003316 | H  | 4.391952  | -3.409952 | 0.994753  | H  | -5.666645 | -2.244745 | 2.122831  |
| H  | -3.575085 | 3.839715  | -0.411453 | H  | 6.154613  | -1.837030 | -1.278838 | H  | -4.117659 | -1.411665 | 2.624592  |
| H  | -2.946199 | 2.696434  | -1.612694 | H  | 5.016945  | -0.485496 | -2.128481 | H  | -5.603050 | -0.481192 | 2.138964  |
| H  | 0.538553  | 1.594415  | 2.465185  | H  | 6.139233  | -0.500655 | -0.762054 | H  | -4.333760 | -3.570828 | 0.486908  |
| C  | 0.944972  | 1.372155  | 1.468765  | H  | 4.202203  | -3.397447 | -2.086932 | H  | -3.350565 | -2.778430 | -0.758039 |
| N  | 1.247320  | -0.062407 | 1.321548  | H  | 2.843372  | -3.301734 | -0.956616 | H  | -2.851880 | -2.727216 | 0.955661  |
| C  | 2.107560  | 2.330585  | 1.220211  | H  | 3.049614  | -2.066960 | -2.288933 | C  | -0.354454 | -2.301331 | -1.021994 |
| C  | 3.449459  | 1.964069  | 1.383071  | C  | 0.081747  | -2.312579 | -0.636925 | N  | -0.570989 | -0.852641 | -1.210542 |
| C  | 4.486783  | 2.871083  | 1.138940  | N  | 0.371141  | -1.159638 | 0.249705  | C  | 1.002291  | -2.741725 | -0.469069 |
| C  | 4.197478  | 4.171042  | 0.734325  | C  | -1.266311 | -2.298654 | -1.338399 | C  | 1.068005  | -3.857149 | 0.381767  |
| C  | 1.836280  | 3.645881  | 0.811584  | C  | -1.534850 | -1.331189 | -2.317831 | C  | 2.288342  | -4.345850 | 0.840072  |
| C  | 2.862967  | 4.556217  | 0.577787  | C  | -2.739931 | -1.332250 | -3.021433 | C  | 3.480699  | -3.718541 | 0.468980  |
| H  | 3.690911  | 0.970002  | 1.757342  | C  | 2.370457  | -2.311623 | -2.764927 | C  | 2.205614  | -2.118318 | -0.823656 |
| H  | 5.518404  | 2.559700  | 1.281705  | C  | -2.234785 | -3.282243 | -1.102422 | C  | 3.433577  | -2.599887 | -0.358998 |
| H  | 4.999045  | 4.879224  | 0.544764  | C  | -3.440288 | -3.291414 | -1.805805 | H  | 0.144503  | -4.347704 | 0.682218  |
| H  | 0.801995  | 3.952922  | 0.670518  | H  | -0.765741 | -0.598978 | -2.562528 | H  | 2.310562  | -5.213610 | 1.494264  |
| H  | 2.623576  | 5.568009  | 0.261224  | H  | -2.921781 | -0.579167 | -3.783671 | H  | 4.434135  | -4.098763 | 0.825533  |
| H  | 0.138367  | 1.668228  | 0.781822  | H  | -4.636774 | -2.319006 | -3.316068 | H  | 2.186930  | -1.260535 | -1.490803 |
| C  | 1.220242  | -0.827749 | 2.609042  | H  | -2.036327 | -4.061914 | -0.370142 | H  | 4.351470  | -2.100774 | -0.658086 |
| C  | 1.823274  | -2.215698 | 2.363606  | H  | -4.173639 | -4.070172 | -1.611376 | H  | -0.498674 | -2.842110 | -1.957780 |
| C  | 2.060357  | -0.164039 | 3.716494  | H  | 0.183205  | -3.264292 | -0.101890 | C  | -0.756792 | -0.486507 | -2.649825 |
| C  | -0.226645 | -0.991277 | 3.114351  | C  | 0.291323  | -1.487944 | 1.708486  | C  | 0.452675  | -0.885740 | -3.515122 |
| H  | -0.258725 | -1.550715 | 4.056548  | C  | -1.118037 | -1.954350 | 2.101167  | C  | -2.027145 | -1.139106 | -3.235300 |
| H  | -0.703293 | -0.020652 | 3.291133  | C  | 1.305696  | -2.567311 | 2.137635  | C  | -0.923777 | 1.031706  | -2.768963 |
| H  | -0.830159 | -1.536354 | 2.380165  | C  | 0.599355  | -0.209228 | 2.498707  | H  | -0.969363 | 1.319637  | -3.825233 |
| H  | 1.956894  | -0.735462 | 4.645206  | H  | 0.532478  | -0.404614 | 3.574208  | H  | -1.838208 | 1.385454  | -2.286298 |
| H  | 3.124415  | -0.155071 | 3.485773  | H  | 1.612800  | 0.159157  | 2.303404  | H  | -0.086335 | 1.562083  | -2.305822 |
| H  | 1.754075  | 0.863324  | 3.936110  | H  | -0.098015 | 0.599999  | 2.257590  | H  | -2.194705 | -0.806544 | -4.266517 |
| H  | 1.819151  | -2.800549 | 3.290216  | H  | 1.278194  | -2.703291 | 3.225199  | H  | -1.961859 | -2.232754 | -3.256814 |
| H  | 1.257609  | -2.769834 | 1.610343  | H  | 1.085492  | -3.542949 | 1.690184  | H  | -2.900065 | -0.862520 | -2.655221 |
| H  | 2.861979  | -2.133207 | 2.023792  | H  | 2.315443  | -2.275114 | 1.834581  | H  | 0.250630  | -0.661690 | -4.568753 |
| Li | 2.740531  | 0.059569  | -0.028917 | H  | -1.167317 | -2.154330 | 3.177789  | H  | 1.345944  | -0.323405 | -3.223354 |
| C  | 2.238842  | -1.819719 | -1.956010 | H  | -1.871583 | -1.195198 | 1.868600  | H  | 0.685890  | -1.953779 | -3.451562 |
| N  | 1.620758  | -0.521467 | -1.603696 | H  | -1.401471 | -2.876326 | 1.585293  | C  | 3.378871  | 1.068029  | 1.265938  |
| C  | 3.534490  | -2.109812 | -1.211892 | C  | -3.523491 | 2.055340  | 0.249149  | N  | 2.268984  | 0.560056  | 1.648536  |
| C  | 3.739419  | -3.347851 | -0.589559 | N  | -2.552492 | 1.889495  | -0.567352 | C  | 3.721582  | 1.412125  | -0.122202 |
| C  | 4.934037  | -3.633679 | 0.070739  | C  | -4.132858 | 0.996453  | 1.065918  | C  | 2.756020  | 1.688974  | -1.100172 |
| C  | 5.950736  | -2.679677 | 0.133333  | C  | -4.148059 | -0.342835 | 0.650324  | C  | 3.141324  | 2.034996  | -2.392129 |
| C  | 4.570773  | -1.163519 | -1.150095 | C  | -4.795413 | -1.305143 | 1.420915  | C  | 4.495348  | 2.104809  | -2.726983 |
| C  | 5.765827  | -1.441449 | -0.481361 | C  | -5.424104 | -0.946490 | 2.614436  | C  | 5.079767  | 1.512590  | -0.462233 |
| H  | 2.946050  | -0.090853 | -0.618253 | C  | -4.791216 | 1.353442  | 2.253399  | C  | 5.465562  | 1.842908  | -1.758847 |
| H  | 5.066771  | -4.600670 | 0.548638  | C  | -5.419010 | 0.385744  | 3.032365  | H  | 1.701607  | 1.674465  | -0.840322 |
| H  | 6.878752  | -2.900327 | 0.653149  | H  | -3.682307 | -0.619410 | -0.291429 | H  | 2.383475  | 2.263338  | -3.135608 |
| H  | 4.456605  | -0.212868 | -1.670189 | H  | -4.810517 | -2.337129 | 1.083807  | H  | 4.792088  | 2.376861  | -3.735951 |
| H  | 6.556839  | -0.696241 | -0.457345 | H  | -5.926936 | -1.701472 | 3.212517  | H  | 5.836156  | 1.322968  | 0.296291  |
| H  | 2.466173  | -1.859716 | -3.028069 | H  | -4.801996 | 2.394650  | 2.568236  | H  | 6.520216  | 1.906360  | -2.011052 |
| C  | 1.313156  | 0.332959  | -2.791550 | H  | -5.912743 | 0.670204  | 3.957173  | H  | 4.176877  | 1.282685  | 1.983754  |
| C  | 0.785879  | 1.686469  | -2.301274 | H  | -3.992711 | 3.040108  | 0.375649  | C  | 2.031802  | 0.328025  | 3.100083  |
| C  | 2.570874  | 0.628375  | -3.632116 | C  | -2.167738 | 3.067434  | -1.410257 | C  | 1.704760  | -1.163492 | 3.264928  |
| C  | 0.243478  | -0.321589 | -3.686698 | C  | -3.396973 | 3.674317  | -2.106613 | C  | 3.207186  | 0.689153  | 4.015802  |
| H  | 0.006191  | 0.311605  | -4.549591 | C  | -4.116397 | 4.114614  | -0.527804 | C  | 0.811237  | 1.181671  | 3.477768  |
| H  | 0.576625  | -1.291269 | -4.072694 | C  | -1.199421 | 2.561777  | -2.483158 | H  | 0.534620  | 0.991761  | 4.520217  |
| H  | -0.679868 | -0.482203 | -3.119785 | H  | -0.880767 | 3.387924  | -3.127126 | H  | 1.032179  | 2.248288  | 3.369120  |
| H  | 2.307031  | 1.254622  | -4.491319 | H  | -0.302147 | 2.126739  | -2.029933 | H  | -0.049599 | 0.943411  | 2.847774  |
| H  | 3.311920  | 1.178901  | -3.040722 | H  | -1.682427 | 1.809460  | -3.115153 | H  | 2.917448  | 0.482930  | 5.050118  |
| H  | 3.049938  | -0.271962 | -4.029824 | H  | -1.112817 | 4.945497  | -1.143108 | H  | 4.101351  | 0.091493  | 3.804007  |
| H  | 0.571764  | 2.340434  | -3.153545 | H  | -2.161754 | 4.524872  | 0.220001  | H  | 3.469702  | 1.751575  | 3.960768  |
| H  | -0.136983 | 1.570942  | -1.726987 | H  | -0.621541 | 3.664655  | -0.010679 | H  | 1.499455  | -1.384808 | 4.317373  |
| H  | 1.528219  | 2.192163  | -1.673541 | H  | -3.074136 | 4.455412  | -2.802205 | H  | 0.812976  | -1.439626 | 2.693100  |
| H  | -1.079423 | 0.100037  | -0.422244 | H  | -3.935817 | 2.911501  | -2.678630 | H  | 2.541438  | -1.788409 | 2.936648  |
| H  | -3.137729 | 0.991488  | 0.036794  | H  | -4.097840 | 4.136775  | -1.404523 |    |           |           |           |

| D1* |          |           |           |
|-----|----------|-----------|-----------|
| Al  | 1.943059 | -0.228470 | -0.427582 |
| H   | 0.829521 | -2.356273 | -1.440652 |
| H   | 1.625876 | -0.006023 | -1.980705 |

| D2 |           |           |           |
|----|-----------|-----------|-----------|
| Al | -1.761906 | -0.111780 | 0.148584  |
| H  | -1.101949 | -2.731612 | -0.336770 |

| D1* (Amide) |           |          |           |
|-------------|-----------|----------|-----------|
| Al          | -1.490911 | 1.334004 | -1.080115 |
| H           | 0.109674  | 1.109836 | -0.764205 |
| H           | -1.864685 | 1.683505 | 2.632035  |

H -0.429083 0.217607 -3.131379  
 Li 0.778803 -0.254555 0.306244  
 C -1.527784 1.206444 1.704655  
 N -2.227841 1.777705 0.553002  
 C -1.645208 -0.305810 1.891352  
 C -1.155886 -1.203072 0.903110  
 C -1.252409 -2.574014 1.210987  
 C -1.792432 -3.060557 2.405271  
 C -2.193172 -0.786118 3.089333  
 C -2.273121 -2.155233 3.350010  
 H -1.372379 -0.936596 -0.551094  
 H -0.897317 -3.303918 0.480190  
 H -1.844366 -4.131080 2.594917  
 H -2.564083 -0.082212 3.833931  
 H -2.707128 -2.508514 4.282606  
 H -0.446758 1.451732 1.653027  
 C -3.226992 2.814473 0.866128  
 C -3.899441 3.276156 -0.432598  
 C -4.331881 2.282935 1.803674  
 C -2.566212 4.051088 1.514726  
 H -3.308573 4.827250 1.737890  
 H -2.065238 3.798492 2.455487  
 H -1.816824 4.474566 0.837098  
 H -5.079898 3.060591 1.998859  
 H -4.838149 1.423085 1.354151  
 H -3.933574 1.965184 2.772346  
 H -4.658899 4.035380 -0.216171  
 H -3.173438 3.709207 -1.127013  
 H -4.398461 2.442838 -0.940041  
 H -1.697631 2.264016 -2.368237  
 C -0.757448 -0.756760 -2.738288  
 N -1.776044 -0.548522 -1.677765  
 C 0.487790 -1.540041 -2.356327  
 C 0.444337 -2.917904 -2.093203  
 C 1.612625 -3.646427 -1.880894  
 C 2.856517 -3.013084 -1.926855  
 C 1.743141 -0.916252 -2.387856  
 C 2.917662 -1.643682 -2.176120  
 H -0.513334 -3.428253 -2.072684  
 H 1.552599 -4.714671 -1.689076  
 H 3.767809 -3.585057 -1.773849  
 H 1.800839 0.148508 -2.600739  
 H 3.877320 -1.135686 -2.217770  
 H -1.215237 -1.269565 -3.590156  
 C -3.144391 -1.065208 -2.021559  
 C -4.065522 -0.853369 -0.814399  
 C -3.718092 -0.303218 -3.227203  
 C -3.122562 -2.571784 -2.328071  
 H -4.142283 -2.921611 -2.521822  
 H -2.527314 -2.819122 -3.213549  
 H -2.734892 -3.133071 -1.471892  
 H -4.725890 -0.666744 -3.457465  
 H -3.778440 0.769645 -3.020328  
 H -3.108915 -0.432732 -4.128172  
 H -5.085743 -1.152683 -1.077586  
 H -3.741640 -1.446746 0.044250  
 H -4.078184 0.192388 -0.500039  
 C 3.726067 0.597269 1.052514  
 N 2.682876 -0.068040 1.383397  
 C 3.808893 1.641383 0.020585  
 C 2.707143 2.394968 -0.405633  
 C 2.862554 3.378107 -1.378868  
 C 4.119345 3.627151 -1.934233  
 C 5.073985 1.919296 -0.523444  
 C 5.227846 2.896355 -1.503179  
 H 1.728041 2.218293 0.025424  
 H 1.999015 3.953110 -1.700353  
 H 4.236163 4.396443 -2.692547  
 H 5.939962 1.357413 -0.179392  
 H 6.209960 3.093030 -1.923715  
 H 4.683524 0.408884 1.548693  
 C 2.785485 -1.045555 2.503594  
 C 2.437218 -2.425082 1.928725  
 C 4.156943 -1.122639 3.186860  
 C 1.734327 -0.623018 3.540146  
 H 1.726059 -1.331419 4.374874  
 H 1.958622 0.373232 3.935872  
 H 0.730006 -0.608397 3.108152  
 H 4.096918 -1.849916 4.001681  
 H 4.947467 -1.463705 2.508747  
 H 4.458230 -0.165681 3.627579  
 H 2.444857 -3.174993 2.726427  
 H 1.436841 -2.435840 1.485965  
 H 3.160999 -2.723190 1.164020

H -1.988110 2.320606 2.282984  
 H -0.534458 -0.560930 -3.101490  
 Li 0.851135 -0.144632 0.590885  
 C -1.563552 1.647545 1.529757  
 N -2.119872 1.966385 0.202022  
 C -1.797717 0.208417 1.970330  
 C -0.938194 -0.814303 1.485157  
 C -1.277851 -2.118651 1.913091  
 C -2.350325 -2.409399 2.766642  
 C -2.867648 -0.061553 2.836393  
 C -3.148649 -1.368047 3.239657  
 H -1.565608 -1.320780 -0.566567  
 H -0.668042 -2.964689 1.582146  
 H -2.553685 -3.435452 3.071022  
 H -3.493815 0.752801 3.200426  
 H -3.978197 -1.567929 3.914472  
 H -0.474564 1.842923 1.552206  
 C -2.953402 3.182587 0.140177  
 C -3.478740 3.380453 -1.286745  
 C -4.182737 3.081489 1.069042  
 C -2.136397 4.436694 0.519212  
 H -2.752988 5.342698 0.469812  
 H -1.736531 4.366104 1.536167  
 H -1.291356 4.556874 -0.167747  
 H -4.810340 3.975472 0.973838  
 H -4.787420 2.206494 0.810007  
 H -3.902440 2.995453 2.123140  
 H -4.130871 4.259737 -1.327355  
 H -2.664337 3.527468 -2.001495  
 H -4.065203 2.514919 -1.612620  
 H -1.557110 1.572606 -2.699273  
 C -0.870173 -1.430077 -2.523007  
 N -1.847995 -0.955008 -1.492323  
 C 0.332950 -2.170088 -1.982081  
 C 0.204894 -3.433158 -1.387200  
 C 1.328255 -4.143159 -0.968678  
 C 2.604363 -3.604914 -1.143038  
 C 1.618203 -1.639426 -2.148434  
 C 2.746211 -2.350068 -1.733370  
 H -0.780702 -3.869323 -1.253251  
 H 1.206797 -5.121157 -0.510859  
 H 3.480513 -4.162200 -0.822820  
 H 1.736577 -0.662416 -2.028120  
 H 3.733486 -1.919614 -1.876060  
 H -1.390134 -2.083375 -3.229110  
 C -3.285691 -1.366704 -1.736503  
 C -4.119515 -0.840521 -0.566445  
 C -3.778764 -0.757045 -3.051670  
 C -3.417844 -2.896026 -1.771895  
 H -4.470488 -3.164165 -1.907725  
 H -2.861336 -3.357730 -2.594075  
 H -3.083781 -3.335677 -0.826102  
 H -4.833408 -1.012545 -3.194957  
 H -3.684510 0.332142 -3.043744  
 H -3.228587 -1.134381 -3.919971  
 H -5.171411 -1.099842 -0.724915  
 H -3.796597 -1.278781 0.382869  
 H -4.034673 0.244671 -0.468868  
 C 3.907349 0.721637 0.957263  
 N 2.831985 0.246963 1.463488  
 C 4.040803 1.380159 -0.351463  
 C 2.963860 1.945725 -1.047644  
 C 3.169195 2.566201 -2.276534  
 C 4.451309 2.634747 -2.826754  
 C 5.329385 1.476166 -0.901887  
 C 5.533806 2.088727 -2.135693  
 H 1.964364 1.907513 -0.628305  
 H 2.324924 3.002736 -2.802631  
 H 4.606995 3.122038 -3.785339  
 H 6.175296 1.060181 -0.358399  
 H 6.535058 2.147091 -2.553096  
 H 4.855007 0.656352 1.502078  
 C 2.880633 -0.342111 2.830659  
 C 2.466927 -1.814722 2.695007  
 C 4.242224 -0.263883 3.532487  
 C 1.839346 0.420653 3.663880  
 H 1.790535 0.002418 4.674730  
 H 2.104723 1.480447 3.741575  
 H 0.843127 0.335955 3.219298  
 H 4.142773 -0.699858 4.530730  
 H 5.019816 -0.832123 3.009159  
 H 4.586052 0.768693 3.661552  
 H 2.436764 -2.286217 3.682796  
 H 1.467415 -1.904417 2.258820  
 H 3.179222 -2.363914 2.070461

Li1  
 3.356795 2.759321 -0.038546  
 H 4.261770 1.479798 0.499479  
 H 2.912023 2.066501 -1.478643  
 H 3.929045 4.242393 0.008703  
 H 1.972613 2.358374 0.783189  
 Li 2.505544 0.598386 -0.136546  
 C -0.935548 -0.412574 0.575374  
 N -1.797019 -0.222584 -0.338537  
 C 0.410854 -0.937327 0.261420  
 C 0.814869 -1.168319 -1.065315  
 C 2.095681 -1.647516 -1.339015  
 C 2.993222 -1.905569 -0.293437  
 C 1.318107 -1.192767 1.302452  
 C 2.600894 -1.676113 1.028910  
 H 0.111225 -0.951401 -1.862821  
 H 2.403421 -1.807158 -2.368160  
 H 3.995099 -2.263281 -0.509924  
 H 1.022748 -0.996075 2.329993  
 H 3.297958 -1.852894 1.842078  
 H -1.117992 -0.205521 1.638231  
 C -3.132742 0.308386 -0.048952  
 C -4.125488 -0.737563 -0.581734  
 C -3.424857 0.601551 1.427437  
 C -3.255013 1.601213 -0.872622  
 H -4.267292 2.010217 -0.787845  
 H -2.546018 2.356634 -0.519143  
 H -3.004327 1.402621 -1.927322  
 H -4.442644 0.990738 1.526986  
 H -3.358449 -0.301253 2.045462  
 H -2.744756 1.356543 1.837369  
 H -5.151751 -0.365159 -0.497060  
 H -3.918413 -0.958536 -1.632752  
 H -4.049976 -1.671250 -0.014429

33

Li2\*  
 -0.277295 2.004944 -0.552043  
 H -1.643529 2.762756 -0.824696  
 H 0.605131 1.306617 -1.780523  
 H -0.556737 -0.214767 1.748603  
 H 1.099981 3.050768 -0.272752  
 Li 2.162229 1.777638 -0.881514  
 C -0.286085 -0.023476 0.699751  
 N -1.143306 -0.167943 -0.292513  
 C 1.182665 -0.261081 0.417203  
 C 1.542874 -1.213410 -0.547105  
 C 2.883692 -1.443950 -0.849492  
 C 3.889227 -0.724418 -0.195950  
 C 2.195932 0.434742 1.097460  
 C 3.542055 0.209344 0.863660  
 H 0.746678 -1.725220 -1.077723  
 C 3.146509 -2.175834 -1.608297  
 H 4.933968 -0.896997 -0.439413  
 H 1.920445 1.177375 1.842549  
 H 4.315998 0.758881 1.316131  
 H -0.159408 1.593575 1.111096  
 C -2.559296 -0.436908 0.038457  
 C -3.339900 -0.311662 -1.274015  
 C -2.677951 -1.877256 0.566085  
 C -3.147638 0.539941 1.072337  
 H -4.205692 0.311450 1.241721  
 H -2.642099 0.472807 2.042459  
 H -3.075159 1.573301 0.721278  
 H -3.724513 -2.135609 0.765170  
 H -2.281301 -2.586598 -0.167947  
 H -2.120665 -2.007483 1.501626  
 H -4.397076 -0.560451 -1.128373  
 H -3.272840 0.709655 -1.661279  
 H -2.921845 -0.986999 -2.027489

33

Li3  
 0.810996 1.872647 -0.158819  
 H 1.857537 2.987225 -0.853310  
 H 0.658331 2.779163 1.237035  
 H 0.258447 -1.826812 -0.638704  
 H -0.517413 2.550458 -0.887150  
 Li 0.434529 4.083727 -0.176724  
 C 0.042771 -0.768200 -0.841885  
 N 1.057583 0.063645 -0.204484  
 C -1.371360 -0.505446 -0.356482  
 C -1.645329 -0.318543 1.004017  
 C -2.952936 -0.128597 1.449260  
 C -4.011905 -0.122381 0.539735  
 C -2.440387 -0.494026 -1.258956  
 C -3.750573 -0.306221 -0.818178  
 H -0.819549 -0.314454 1.710309  
 H -3.146011 0.014342 2.509551

87

D2 (Amide)  
 Al -1.360185 1.046109 -1.198582  
 H 0.226336 0.785149 -0.922382

## Mechanism Li

33



|      |           |           |            |
|------|-----------|-----------|------------|
| H    | -5.030968 | 0.028558  | 0.885951   |
| H    | -2.242140 | -0.624774 | -2.320951  |
| H    | -4.566227 | -0.295181 | -1.536747  |
| H    | 0.048447  | -0.679609 | -1.942044  |
| C    | 2.339846  | -0.591689 | 0.114500   |
| C    | 3.282151  | 0.464247  | 0.704620   |
| C    | 2.152766  | -1.698117 | 1.171432   |
| C    | 2.996299  | -1.183516 | -1.147613  |
| H    | 3.965552  | -1.638838 | -0.912326  |
| H    | 2.370432  | -1.959666 | -1.600869  |
| H    | 3.155769  | -0.398788 | -1.895165  |
| H    | 3.111678  | -2.172648 | 1.409888   |
| H    | 1.739042  | -1.275351 | 2.092898   |
| H    | 1.477840  | -2.489779 | 0.830114   |
| H    | 4.236710  | 0.013109  | 0.994763   |
| H    | 3.498972  | 1.256359  | -0.021836  |
| H    | 2.845873  | 0.920515  | 1.602109   |
|      | 35        |           |            |
| Li4  |           |           |            |
| Al   | 2.108621  | 1.391261  | -0.205249  |
| H    | 3.716455  | 1.483732  | -0.669160  |
| H    | 2.374456  | 2.297589  | 1.174003   |
| H    | -0.157415 | -0.985479 | -1.780416  |
| H    | 1.646805  | 2.696337  | -1.121734  |
| Li   | 3.287804  | 3.305096  | -0.197869  |
| C    | -0.100069 | -0.070951 | -1.170180  |
| N    | 1.063122  | -0.093872 | -0.298327  |
| C    | -1.459831 | 0.144154  | -0.510977  |
| C    | -1.593353 | 0.832263  | 0.697813   |
| C    | -2.852846 | 1.075896  | 1.247112   |
| C    | -4.003765 | 0.633280  | 0.594412   |
| C    | -2.621281 | -0.296246 | -1.157021  |
| C    | -3.882908 | -0.056049 | -0.613137  |
| H    | -0.696865 | 1.164139  | 2.124721   |
| H    | -2.934903 | 1.611351  | 2.189887   |
| H    | -4.984626 | 0.819487  | 1.023652   |
| H    | -2.536757 | -0.838537 | -0.2097737 |
| H    | -4.771215 | -0.412178 | -1.128951  |
| H    | 0.024533  | 0.743807  | -1.899740  |
| C    | 1.475081  | -1.401896 | 0.248982   |
| C    | 2.542945  | -1.142930 | 1.319013   |
| C    | 0.304047  | -2.151326 | 0.906238   |
| C    | 2.090811  | -2.285740 | -0.854923  |
| H    | 2.406490  | -3.257072 | -0.455881  |
| H    | 1.373172  | -2.480847 | -1.659028  |
| H    | 2.964088  | -1.792006 | -1.294673  |
| H    | 0.653327  | -3.101898 | 1.325513   |
| H    | -0.137015 | -1.557790 | 1.712324   |
| H    | -0.489300 | -2.379731 | 0.188015   |
| H    | 2.908153  | -2.084438 | 1.742552   |
| H    | 3.415451  | -0.625343 | 0.895676   |
| H    | 2.138089  | -0.535690 | 2.136050   |
| H    | 4.259761  | 5.257737  | 0.057594   |
| H    | 4.716988  | 4.949505  | -0.446529  |
|      | 35        |           |            |
| Li5* |           |           |            |
| Al   | 2.637732  | -1.432105 | -0.072240  |
| H    | 3.516673  | -0.941604 | 1.325243   |
| H    | 4.073807  | -1.595003 | -0.894781  |
| H    | 0.184093  | -0.377883 | 1.842285   |
| H    | 2.577608  | -2.987306 | 0.503931   |
| Li   | 4.454169  | -2.426521 | 0.838124   |
| C    | 0.046649  | -0.734071 | 0.813085   |
| N    | 1.099402  | -0.206636 | -0.070722  |
| C    | -1.393543 | -0.513022 | 0.390258   |
| C    | -1.834870 | -0.905929 | -0.879359  |
| C    | -3.169385 | -0.751514 | -1.248081  |
| C    | -4.089140 | -0.205385 | -0.349521  |
| C    | -2.324269 | 0.023137  | 1.285390   |
| C    | -3.663209 | 0.179129  | 0.920821   |
| H    | -1.124143 | -1.332828 | -1.583518  |
| H    | -3.494780 | -1.061044 | -2.237889  |
| H    | -5.129692 | -0.084166 | -0.638037  |
| H    | -1.998541 | 0.325406  | 2.278839   |
| H    | -4.370688 | 0.602403  | 1.629089   |
| H    | 0.202791  | -1.823642 | 0.895989   |
| H    | 1.301582  | 1.265838  | -0.161751  |
| C    | 2.571282  | 1.475822  | -1.000983  |
| C    | 0.132531  | 1.966654  | -0.872140  |
| C    | 1.510712  | 1.886965  | 1.227533   |
| H    | 1.776518  | 2.945578  | 1.129589   |
| H    | 0.601002  | 1.837235  | 1.834918   |
| H    | 2.316388  | 1.375156  | 1.763368   |
| H    | 0.366963  | 3.028959  | -1.006612  |
| H    | -0.042908 | 1.527059  | -1.859060  |
| H    | -0.796792 | 1.899113  | -0.302676  |
| H    | 2.757135  | 2.544226  | -1.151034  |

|        |           |           |           |
|--------|-----------|-----------|-----------|
| H      | 3.455560  | 1.058144  | -0.503109 |
| H      | 2.474723  | 1.012409  | -1.989272 |
| H      | 1.169735  | -0.974701 | -1.180857 |
| H      | 1.605667  | -1.759880 | -1.651711 |
|        | 35        |           |           |
| Li6    |           |           |           |
| Al     | -2.527746 | -1.907149 | 0.039302  |
| H      | -3.846830 | -0.978036 | 0.478427  |
| H      | -3.628365 | -3.252819 | -0.154756 |
| H      | -0.162317 | 0.186720  | -1.749933 |
| H      | -2.675940 | -1.624103 | -1.603955 |
| Li     | -4.517922 | -2.028223 | -1.059115 |
| C      | 0.005768  | -0.439637 | -0.870511 |
| N      | -1.009203 | -0.096857 | 0.155208  |
| C      | 1.454183  | -0.365126 | -0.433047 |
| C      | 1.895641  | -1.108486 | 0.670036  |
| C      | 3.232921  | -1.077722 | 1.062631  |
| C      | 4.156742  | -0.312437 | 0.349080  |
| C      | 2.392505  | 0.386384  | -1.148064 |
| C      | 3.733340  | 0.414768  | -0.762894 |
| H      | 1.191339  | -1.735512 | 1.214369  |
| H      | 3.556001  | -1.661816 | 1.920225  |
| H      | 5.199518  | -0.289668 | 0.653281  |
| H      | 2.072627  | 0.956784  | -0.201752 |
| H      | 4.445780  | 1.007030  | -1.331044 |
| H      | -0.196674 | -1.469136 | -1.195825 |
| C      | -1.420783 | 1.341317  | -0.832297 |
| C      | -2.198047 | 1.473690  | 1.573508  |
| C      | -0.222980 | 2.302368  | 0.291259  |
| C      | -2.337322 | 1.686974  | -0.918986 |
| H      | -2.677435 | 2.724251  | -0.832297 |
| H      | -1.824020 | 1.588434  | -1.881149 |
| H      | -3.209880 | 1.029248  | -0.928496 |
| H      | -0.577385 | 3.325013  | 0.461700  |
| H      | 0.474140  | 2.046757  | 1.096125  |
| H      | 0.334638  | 2.300642  | -0.649363 |
| H      | -2.564989 | 2.498106  | 1.692456  |
| H      | -3.052126 | 0.791885  | 1.592184  |
| H      | -1.554142 | 1.251976  | 2.433809  |
| H      | -0.623940 | -0.362035 | 1.060766  |
| H      | -1.352919 | -2.590680 | 0.894325  |
|        | 6         |           |           |
| NaAlH4 |           |           |           |
| Al     | -1.046664 | 0.000002  | -0.000032 |
| H      | -0.244737 | 1.272555  | -0.711510 |
| H      | -0.244760 | -1.252393 | -0.746444 |
| H      | -2.638144 | -0.000004 | 0.000641  |
| H      | -0.244177 | -0.020174 | 1.457525  |
| Na     | 1.543496  | 0.000000  | 0.000019  |
|        | 33        |           |           |
| Na1    |           |           |           |
| C      | 1.149232  | -0.505050 | 0.599522  |
| N      | 1.963341  | -0.195415 | -0.325638 |
| C      | -0.136182 | -1.171831 | 0.298563  |
| C      | -1.041610 | -1.438059 | 1.337852  |
| C      | -2.272138 | -2.045475 | 1.072757  |
| C      | -2.609242 | -2.397217 | -0.236419 |
| C      | -0.480864 | -1.535531 | -1.016086 |
| C      | -1.708421 | -2.141191 | -1.279461 |
| H      | -0.784265 | -1.158940 | 2.356948  |
| H      | -2.966789 | -2.238058 | 1.884965  |
| H      | -3.565717 | -2.867515 | -0.444936 |
| H      | 0.231279  | -1.331166 | -1.810138 |
| H      | -1.965364 | -2.420683 | -2.297531 |
| H      | 1.328949  | -0.298352 | 1.663098  |
| C      | 3.237774  | 0.475036  | -0.047237 |
| C      | 4.327811  | -0.439811 | -0.629123 |
| C      | 3.197635  | 1.794640  | -0.835527 |
| C      | 3.528956  | 0.759112  | 1.430956  |
| H      | 4.500694  | 1.253635  | 1.521724  |
| H      | 2.781537  | 1.425585  | 1.875724  |
| H      | 3.574186  | -0.161473 | 2.024094  |
| H      | 4.160809  | 2.310049  | -0.760710 |
| H      | 2.984729  | 1.602606  | -1.891005 |
| H      | 2.420272  | 2.459233  | -0.445102 |
| H      | 5.308177  | 0.041757  | -0.552498 |
| H      | 4.368193  | -1.391148 | -0.088228 |
| H      | 4.123960  | -0.653342 | -1.682298 |
| Al     | -3.437640 | 2.972417  | 0.016623  |
| H      | -4.397310 | 1.623508  | 0.136136  |
| H      | -2.223137 | 2.549396  | 1.067079  |
| H      | -4.123116 | 4.401752  | 0.202611  |
| H      | -2.683463 | 2.650669  | -1.427575 |
| Na     | -2.298673 | 0.618294  | -0.313070 |

|      |           |           |           |
|------|-----------|-----------|-----------|
|      | 33        |           |           |
| Na2* |           |           |           |
| Al   | -0.348257 | 2.111261  | -0.074318 |
| H    | -1.734699 | 2.880891  | -0.035629 |
| H    | 0.406108  | 1.688609  | -1.470072 |
| H    | -0.782458 | -0.623203 | 1.672328  |
| H    | 0.986400  | 3.035001  | 0.501110  |
| Na   | 2.407056  | 1.710059  | -0.552748 |
| C    | -0.481328 | -0.221864 | 0.689586  |
| N    | -1.331778 | -0.152384 | -0.326122 |
| C    | 0.968271  | -0.543583 | 0.388663  |
| C    | 1.330139  | -1.029402 | -0.873518 |
| C    | 2.669456  | -1.295675 | -1.172088 |
| C    | 3.662544  | -1.093898 | -0.206988 |
| C    | 1.964573  | -0.362428 | 1.360010  |
| C    | 3.303362  | -0.635492 | 1.067421  |
| H    | 0.537016  | -1.152525 | -1.605033 |
| H    | 2.938829  | -1.667203 | -2.157491 |
| H    | 4.702314  | -1.312785 | -0.435462 |
| H    | 1.686310  | 0.021647  | 2.339371  |
| H    | 4.063951  | -0.498489 | 1.831838  |
| H    | -0.220932 | 1.133310  | 1.355532  |
| C    | -2.753838 | -0.433979 | -0.057264 |
| C    | -3.524024 | -0.006202 | -1.311459 |
| C    | -2.932886 | -1.949284 | 0.153707  |
| C    | -3.325024 | 0.317937  | 1.160111  |
| C    | -4.390704 | 0.090742  | 1.282556  |
| H    | -2.829252 | 0.030963  | 2.095100  |
| H    | -3.218668 | 1.399451  | 0.103634  |
| H    | -3.989113 | -2.208379 | 0.296458  |
| H    | -2.554894 | -2.499584 | -0.714428 |
| H    | -2.384107 | -2.294200 | 1.038753  |
| H    | -4.590532 | -0.243856 | -1.223269 |
| H    | -3.418612 | 1.071374  | -1.471944 |
| H    | -3.122246 | -0.518904 | -2.191643 |
|      | 33        |           |           |
| Na3  |           |           |           |
| Al   | -2.097997 | -0.959830 | -0.167773 |
| H    | -3.692410 | -0.740255 | -0.623630 |
| H    | -2.397460 | -1.749812 | 1.272560  |
| H    | 0.467137  | 1.084375  | -1.779474 |
| H    | -1.740498 | -2.276099 | -1.112470 |
| Na   | -3.718102 | -2.967892 | -0.117131 |
| C    | 0.285227  | 0.191849  | -1.159903 |
| N    | -0.855814 | 0.379956  | -0.282148 |
| C    | 1.607512  | -0.203893 | -0.506584 |
| C    | 1.651114  | -0.876948 | 0.717291  |
| C    | 2.867039  | -1.288357 | 1.265026  |
| C    | 4.064273  | -1.033068 | 0.595449  |
| C    | 2.814980  | 0.047548  | -1.169577 |
| C    | 4.033467  | -0.361010 | -0.627605 |
| H    | 0.719008  | -1.061517 | 1.244864  |
| H    | 2.879346  | -1.808093 | 2.220199  |
| H    | 5.011803  | -1.349632 | 1.023498  |
| H    | 2.801228  | 0.575233  | -2.122358 |
| H    | 4.959468  | -0.149354 | -1.156756 |
| H    | 0.046600  | -0.605175 | -1.880479 |
| C    | -1.082940 | 1.741601  | 0.237484  |
| C    | -2.153469 | 1.655969  | 1.332896  |
| C    | 0.188469  | 2.348640  | 0.856071  |
| C    | -1.598897 | 2.673971  | -0.878703 |
| H    | -1.777757 | 3.688177  | -0.501178 |
| H    | -0.876918 | 2.753031  | -1.698817 |
| H    | -2.536811 | 2.286844  | -1.291191 |
| H    | -0.026087 | 3.346379  | 1.256522  |
| H    | 0.564107  | 1.721663  | 1.670085  |
| H    | 0.991209  | 2.455047  | 0.119832  |
| H    | -2.376838 | 2.649061  | 1.737635  |
| H    | -3.094844 | 1.250136  | 0.938052  |
| H    | -1.817146 | 1.017087  | 2.156566  |
|      | 35        |           |           |
| Na4  |           |           |           |
| Al   | -2.105601 | -0.603254 | -0.165006 |
| H    | -3.655991 | -0.173350 | -0.621271 |
| H    | -2.505192 | -1.343561 | 1.277159  |
| H    | 0.703899  | 1.083375  | -1.781206 |
| H    | -1.923098 | -1.955113 | -1.108347 |
| Na   | -3.980255 | -2.381074 | -0.109031 |
| C    | 0.408034  | 0.223884  | -1.158821 |
| N    | -0.696890 | 0.561241  | -0.279551 |
| C    | 1.668498  | -0.339949 | -0.506733 |
| C    | 1.625165  | -1.012492 | 0.717464  |
| C    | 2.777615  | -1.578647 | 1.264249  |
| C    | 3.997273  | -1.481853 | 0.593381  |
| C    | 2.897766  | -0.248120 | -1.170902 |
| C    | 4.053172  | -0.811880 | -0.629907 |

|   |           |           |           |
|---|-----------|-----------|-----------|
| H | 0.677296  | -1.073705 | 1.245667  |
| H | 2.723097  | -2.095199 | 2.219679  |
| H | 4.895877  | -1.919109 | 1.020688  |
| H | 2.951904  | 0.276591  | -2.123895 |
| H | 4.998343  | -0.722870 | -1.160026 |
| H | 0.065821  | -0.537079 | -1.876634 |
| C | -0.742939 | 1.941951  | 0.236937  |
| C | -1.812405 | 1.999420  | 1.335306  |
| C | 0.598418  | 2.379622  | 0.850858  |
| C | -1.136014 | 2.931225  | -0.880449 |
| H | -1.180212 | 3.960959  | -0.505121 |
| H | -0.412095 | 2.913630  | -1.702491 |
| H | -2.117474 | 2.668611  | -1.289660 |
| H | 0.516433  | 3.397428  | 1.249897  |
| H | 0.891745  | 1.710411  | 1.665077  |
| H | 1.406110  | 2.379699  | 0.112354  |
| H | -1.902972 | 3.014114  | 1.738026  |
| H | -2.799752 | 1.718884  | 0.943925  |
| H | -1.560053 | 1.323860  | 2.159706  |
| H | -5.680554 | -4.453580 | 0.226067  |
| H | -6.066786 | -4.087543 | -0.296614 |

|      |           |           |           |
|------|-----------|-----------|-----------|
| Na5* |           |           |           |
| 35   |           |           |           |
| Al   | 2.488747  | -0.843892 | -0.340970 |
| H    | 3.292265  | -0.327400 | 1.082782  |
| H    | 3.817674  | -0.617301 | -1.308280 |
| H    | -0.024573 | -0.407290 | 1.747635  |
| H    | 2.585211  | -2.457660 | 0.018752  |
| Na   | 4.784613  | -1.783363 | 0.417981  |
| C    | -0.153695 | -0.664493 | 0.688240  |
| N    | 0.758471  | 0.120870  | -0.157807 |
| C    | -1.629768 | -0.636566 | 0.337942  |
| C    | -2.062022 | -0.947864 | -0.957446 |
| C    | -3.420136 | -0.977027 | -1.266376 |
| C    | -4.372465 | -0.699578 | -0.282482 |
| C    | -2.591414 | -0.369918 | 1.317368  |
| C    | -3.954002 | -0.398450 | 1.012650  |
| H    | -1.324372 | -1.165712 | -1.726766 |
| H    | -3.738119 | -1.219862 | -2.277083 |
| H    | -5.431607 | -0.721092 | -0.524612 |
| H    | -2.271538 | -0.133802 | 2.330527  |
| H    | -4.686032 | -0.183287 | 1.786859  |
| H    | 0.175761  | -1.711298 | 0.598881  |
| C    | 0.716360  | 1.606726  | -0.082957 |
| C    | 1.893510  | 2.117957  | -0.927557 |
| C    | -0.583220 | 2.180055  | -0.671600 |
| C    | 0.888735  | -0.396883 | 1.062802  |
| H    | 0.978096  | 3.189176  | 1.381182  |
| H    | 0.028060  | 1.832468  | 1.986198  |
| H    | 1.789864  | 1.665573  | 1.809936  |
| H    | -0.529173 | 3.274949  | -0.686630 |
| H    | -0.732512 | 1.830512  | -1.698087 |
| H    | -1.461525 | 1.896791  | -0.087661 |
| H    | 1.891035  | 3.212536  | -0.960071 |
| H    | 2.854976  | 1.802298  | -0.504615 |
| H    | 1.830394  | 1.750809  | -1.957783 |
| H    | 0.875334  | -0.475221 | -1.326855 |
| H    | 1.395722  | -1.140042 | -1.928347 |

|     |           |           |           |
|-----|-----------|-----------|-----------|
| Na6 |           |           |           |
| 35  |           |           |           |
| Al  | -2.813439 | -1.474207 | 0.574625  |
| H   | -3.741722 | -0.114903 | 0.791878  |
| H   | -4.117712 | -2.571151 | 0.675913  |
| H   | 0.091457  | -0.106537 | -1.639326 |
| H   | -2.690416 | -1.528260 | -1.080721 |
| Na  | -5.002491 | -1.293838 | -0.816199 |
| C   | 0.250276  | -0.503502 | -0.632247 |
| N   | -0.589329 | 0.248722  | 0.301642  |
| C   | 1.740850  | -0.584791 | -0.345300 |
| C   | 2.205338  | -1.046013 | 0.893365  |
| C   | 3.570648  | -1.161734 | 1.150021  |
| C   | 4.501460  | -0.826588 | 0.164973  |
| C   | 2.684793  | -0.264109 | -1.326839 |
| C   | 4.053119  | -0.381772 | -1.078195 |
| H   | 1.492549  | -1.332914 | 1.664265  |
| H   | 3.908704  | -1.522624 | 2.117998  |
| H   | 5.565870  | -0.917182 | 0.363709  |
| H   | 2.344972  | 0.084793  | -2.300311 |
| H   | 4.767973  | -0.123130 | -1.855204 |
| H   | -0.144008 | -1.528945 | -0.654976 |
| C   | -0.662364 | 1.724103  | 0.185986  |
| C   | -1.409980 | 2.209898  | 1.433977  |
| C   | 0.709006  | 2.418910  | 0.120512  |
| C   | -1.483728 | 2.079111  | -1.060322 |
| H   | -1.622919 | 3.163620  | -1.127873 |
| H   | -0.988451 | 1.755315  | -1.982074 |
| H   | -2.464454 | 1.597386  | -1.009455 |

|   |           |           |           |
|---|-----------|-----------|-----------|
| H | 0.580113  | 3.507742  | 0.113532  |
| H | 1.327600  | 2.155259  | 0.984929  |
| H | 1.263823  | 2.144657  | -0.781306 |
| H | -1.560864 | 3.293673  | 1.393380  |
| H | -2.384128 | 1.718889  | 1.513006  |
| H | -0.836417 | 1.989711  | 2.343125  |
| H | -0.345300 | -0.002650 | 1.255479  |
| H | -1.675751 | -1.987968 | 1.575009  |

## Mechanism K

|       |           |           |           |
|-------|-----------|-----------|-----------|
| 6     |           |           |           |
| KAIH4 |           |           |           |
| Al    | -1.588720 | -0.000077 | 0.000000  |
| H     | -0.825651 | -0.737361 | -1.276920 |
| H     | -0.825677 | -0.736884 | 1.277237  |
| H     | -3.186913 | -0.000303 | -0.000035 |
| H     | -0.827192 | 1.475205  | -0.000254 |
| K     | 1.385199  | 0.000018  | -0.000001 |
| 33    |           |           |           |
| K1    |           |           |           |
| C     | -0.089551 | -1.326222 | 0.627710  |
| N     | 0.833924  | -1.159721 | -0.236802 |
| C     | -1.492382 | -0.963994 | 0.343810  |
| C     | -2.360950 | -0.675654 | 1.405699  |
| C     | -3.679660 | -0.298432 | 1.157818  |
| C     | -4.150581 | -0.224553 | -0.153152 |
| C     | -1.979572 | -0.902912 | -0.972935 |
| C     | -3.300015 | -0.535065 | -1.218139 |
| H     | -1.994398 | -0.729355 | 2.428036  |
| H     | -4.338803 | -0.060982 | 1.987593  |
| H     | -5.179903 | 0.063770  | -0.345843 |
| H     | -1.318434 | -1.182493 | -1.278972 |
| H     | -3.673913 | -0.505362 | -2.238004 |
| H     | 0.099049  | -1.726256 | 1.631410  |
| C     | 2.224609  | -1.570562 | 0.031782  |
| C     | 2.519513  | -2.711649 | -0.955922 |
| C     | 3.109066  | -0.359192 | -0.299299 |
| C     | 2.504343  | -2.034902 | 1.465346  |
| C     | 3.563257  | -2.292318 | 1.561006  |
| H     | 2.291169  | -1.246530 | 2.195488  |
| H     | 1.929247  | -2.928759 | 1.731803  |
| H     | 4.166491  | -0.616003 | -0.181654 |
| H     | 2.960860  | -0.045084 | -1.338682 |
| H     | 2.892712  | 0.487705  | 0.361352  |
| H     | 3.571549  | -3.007331 | -0.887937 |
| H     | 1.900194  | -3.587873 | -0.737235 |
| H     | 2.314682  | -2.395327 | -1.983216 |
| Al    | 1.256801  | 3.967872  | 0.586803  |
| H     | -0.356807 | 3.973272  | 0.212630  |
| H     | 1.432962  | 2.492165  | 1.320903  |
| H     | 1.808240  | 5.234807  | 1.400591  |
| H     | 1.943842  | 3.688746  | -0.896631 |
| K     | 0.209642  | 1.607249  | -0.999951 |
| 33    |           |           |           |
| K2*   |           |           |           |
| Al    | -0.514093 | 2.106588  | 0.049676  |
| H     | -1.952935 | 2.768967  | 0.159157  |
| H     | 0.319434  | 1.745691  | -1.304777 |
| H     | -1.004482 | -0.724828 | 1.628263  |
| H     | 0.672222  | 3.128250  | 0.732165  |
| K     | 2.649172  | 1.747076  | -0.222749 |
| C     | -0.666832 | -0.302110 | 0.666104  |
| N     | -1.520366 | -0.112663 | -0.339036 |
| C     | 0.733635  | -0.776493 | 0.339799  |
| C     | 1.084922  | -1.081639 | -0.979291 |
| C     | 2.379911  | -1.510496 | -1.284776 |
| C     | 3.335168  | -1.653719 | -0.273133 |
| C     | 1.691394  | -0.931338 | 1.352355  |
| C     | 2.982985  | -1.370520 | 1.052456  |
| H     | 0.316220  | -0.959625 | -1.737070 |
| H     | 2.640342  | -1.748825 | -2.313264 |
| H     | 4.334970  | -2.009727 | -0.508582 |
| H     | 1.418458  | -0.701471 | 2.381168  |
| H     | 3.708326  | -1.509318 | 1.850629  |
| H     | -0.251638 | 0.948979  | 1.347737  |
| C     | -2.951670 | -0.362602 | -0.089062 |
| C     | -3.712731 | 0.245924  | -1.272565 |
| C     | -3.189108 | -1.885351 | -0.068550 |
| C     | -3.496104 | 0.244672  | 1.219201  |
| H     | -4.569228 | 0.040679  | 1.311217  |
| H     | -3.013485 | -0.181054 | 2.107221  |
| H     | -3.351682 | 1.328327  | 1.236912  |
| H     | -4.254168 | -2.122584 | 0.047519  |
| H     | -2.831484 | -2.335357 | -1.000690 |
| H     | -2.649721 | -2.356244 | 0.762722  |
| H     | -4.786143 | 0.032111  | -1.207326 |

|     |           |           |           |
|-----|-----------|-----------|-----------|
| H   | -3.573095 | 1.331065  | -1.295646 |
| H   | -3.329817 | -0.164443 | -2.212883 |
| 33  |           |           |           |
| K3  |           |           |           |
| Al  | -1.953524 | -0.242769 | -0.140882 |
| H   | -3.423900 | 0.404403  | -0.579334 |
| H   | -2.377161 | -0.918999 | 1.318077  |
| H   | 1.037692  | 1.089330  | -1.785924 |
| H   | -1.894454 | -1.585384 | -1.107001 |
| K   | -4.301249 | -2.054279 | -0.071704 |
| C   | 0.638856  | 0.277616  | -1.155835 |
| N   | -0.409543 | 0.751017  | -0.273079 |
| C   | 1.823392  | -0.435665 | -0.506613 |
| C   | 1.700073  | -1.090499 | 0.721986  |
| C   | 2.774325  | -1.793298 | 1.269424  |
| C   | 3.994470  | -1.854957 | 0.594905  |
| C   | 3.052168  | -0.503969 | -1.174622 |
| C   | 4.129701  | -1.204979 | -0.633039 |
| H   | 0.752972  | -1.027136 | 1.251487  |
| H   | 2.658904  | -2.292721 | 2.228709  |
| H   | 4.832726  | -2.398570 | 1.023037  |
| H   | 3.168392  | 0.004101  | -2.131177 |
| H   | 5.076936  | -1.238507 | -1.166120 |
| H   | 0.201584  | -0.440478 | -1.866314 |
| C   | -0.283250 | 2.130585  | 0.228678  |
| C   | -1.321529 | 2.327087  | 1.341305  |
| C   | 1.109289  | 2.414146  | 0.820369  |
| C   | -0.572676 | 3.150198  | -0.894064 |
| H   | -0.488404 | 4.182196  | -0.531137 |
| H   | 0.131072  | 3.037250  | -1.726216 |
| H   | -1.584576 | 3.000550  | -1.285561 |
| H   | 1.154148  | 3.439028  | 1.207655  |
| H   | 1.332354  | 1.723946  | 1.639538  |
| H   | 1.901502  | 2.310189  | 0.072274  |
| H   | -1.280735 | 3.348583  | 1.735662  |
| H   | -2.340368 | 2.164132  | 0.965619  |
| H   | -1.141262 | 1.630670  | 2.167165  |
| 35  |           |           |           |
| K4  |           |           |           |
| Al  | -1.851199 | 0.034186  | -0.183413 |
| H   | -3.235167 | 0.849599  | -0.621729 |
| H   | -2.365194 | -0.624711 | 1.254388  |
| H   | 1.292650  | 1.063966  | -1.760253 |
| H   | -1.925857 | -1.284167 | -1.181235 |
| K   | -4.385357 | -1.509388 | -0.181341 |
| C   | 0.797798  | 0.288169  | -1.153455 |
| N   | -0.206075 | 0.855523  | -0.274250 |
| C   | 1.887034  | -0.564270 | -0.505183 |
| C   | 1.670811  | -1.233735 | 0.702592  |
| C   | 2.652964  | -2.061953 | 1.247551  |
| C   | 3.872267  | -2.236775 | 0.591502  |
| C   | 3.114096  | -0.746617 | -1.154587 |
| C   | 4.099896  | -1.573265 | -0.615329 |
| H   | 0.726127  | -1.082698 | 1.218500  |
| H   | 2.466406  | -2.570950 | 2.190469  |
| H   | 4.639161  | -2.878306 | 1.017891  |
| H   | 3.302352  | -0.229065 | -2.094448 |
| H   | 5.048247  | -1.694353 | -1.133525 |
| H   | 0.295265  | -0.362811 | -1.885116 |
| C   | 0.063929  | 2.201290  | 0.261191  |
| C   | -0.964341 | 2.488016  | 1.363482  |
| C   | 1.469395  | 2.315495  | 0.878619  |
| C   | -0.092301 | 3.270747  | -0.841471 |
| H   | 0.098496  | 4.279040  | -0.453130 |
| H   | 0.609082  | 3.099167  | -1.665562 |
| H   | -1.107623 | 3.241962  | -1.251225 |
| H   | 1.620592  | 3.319892  | 1.291793  |
| H   | 1.601657  | 1.585902  | 1.683214  |
| H   | 2.257388  | 2.141975  | 0.139022  |
| H   | -0.816945 | 3.489860  | 1.782080  |
| H   | -1.988600 | 2.447422  | 0.969918  |
| H   | -0.875954 | 1.758260  | 2.175413  |
| H   | -6.965879 | -3.642989 | 1.046927  |
| H   | -7.275583 | -3.544314 | 0.376746  |
| 35  |           |           |           |
| K5* |           |           |           |
| Al  | 2.204657  | -0.438689 | -0.464737 |
| H   | 2.946568  | 0.105087  | 0.968757  |
| H   | 3.438520  | 0.012650  | -1.465789 |
| H   | -0.290518 | -0.413220 | 1.683674  |
| H   | 2.427396  | -2.052821 | -1.175413 |
| K   | 4.958999  | -1.312332 | 0.269960  |
| C   | -0.427288 | -0.614255 | 0.612853  |
| N   | 0.363936  | 0.318572  | -0.201937 |
| C   | -1.908855 | -0.729855 | 0.306237  |
| C   | -2.347008 | -1.010849 | -0.994295 |

|    |           |           |           |     |           |           |           |     |           |           |           |
|----|-----------|-----------|-----------|-----|-----------|-----------|-----------|-----|-----------|-----------|-----------|
| C  | -3.703180 | -1.173309 | -1.268467 | H   | 4.151368  | 2.145116  | 0.845044  | H   | -1.432066 | -0.035799 | 1.955827  |
| C  | -4.647555 | -1.061837 | -0.244695 | H   | 5.668679  | 0.403913  | -0.075088 | H   | -3.813037 | 0.469780  | 2.419627  |
| C  | -2.861410 | -0.629704 | 1.324953  | H   | 2.270637  | -2.163007 | -0.738406 | H   | -5.544488 | 0.002003  | 0.696512  |
| C  | -4.222102 | -0.792008 | 1.055085  | H   | 4.723461  | -1.756974 | -0.867771 | H   | -2.490775 | -1.463543 | -1.951362 |
| H  | -1.614097 | -1.099241 | -1.793486 |     |           |           |           | H   | -4.874390 | -0.973642 | -1.489686 |
| H  | -4.025807 | -1.390355 | -2.283655 |     |           |           |           | H   | -0.256815 | -1.587202 | -1.279199 |
| H  | -5.705438 | -1.186971 | -0.459810 | P1  | 31        |           |           | C   | 1.875765  | -0.129612 | -0.049847 |
| H  | -2.535976 | -0.418660 | 2.341931  | Al  | 3.534562  | 2.978696  | -0.479510 | C   | 2.716838  | 0.936831  | 0.338196  |
| H  | -4.947525 | -0.705051 | 1.860065  | H   | 4.582800  | 1.925695  | 0.255951  | C   | 4.085529  | 0.761257  | 0.492961  |
| H  | 0.011989  | -1.609003 | 0.441929  | H   | 3.226729  | 2.019354  | -1.797793 | C   | 4.675350  | -0.488595 | 0.281849  |
| C  | 0.157894  | 1.781800  | -0.034487 | H   | 3.906416  | 4.514233  | -0.655606 | C   | 2.483920  | -1.384547 | -0.262062 |
| C  | 1.246614  | 2.473611  | -0.869392 | H   | 2.192847  | 2.521037  | 0.383254  | C   | 3.859086  | -1.552779 | -0.092971 |
| C  | -1.213387 | 2.240007  | -0.558773 | Li  | 2.988973  | 0.734142  | -0.256431 | H   | 2.282937  | 1.915634  | 0.534727  |
| C  | 0.315154  | 2.200912  | 1.435322  | C   | -0.327253 | -0.535609 | 0.558490  | H   | 4.696600  | 1.608265  | 0.795167  |
| H  | 0.286255  | 3.293547  | 1.520583  | N   | -1.196106 | -0.651790 | -0.370646 | H   | 5.744797  | -0.626328 | 0.410147  |
| H  | -0.494721 | 1.806150  | 2.058168  | C   | 1.069986  | -0.949921 | 0.361889  | H   | 1.890560  | -2.234982 | -0.579857 |
| H  | 1.269512  | 1.843114  | 1.834123  | C   | 1.538093  | -1.368404 | -0.897316 | H   | 4.292719  | -2.534731 | -0.267164 |
| H  | -1.281700 | 3.333238  | -0.507717 | C   | 2.871556  | -1.739354 | -1.064324 |     |           |           |           |
| H  | -1.351274 | 1.936441  | -1.601409 | C   | 3.758362  | -1.699885 | 0.020787  | 33  |           |           |           |
| H  | -2.038622 | 1.826148  | 0.024825  | C   | 1.966922  | -0.907320 | 1.443167  | P4  |           |           |           |
| H  | 1.116394  | 3.560685  | -0.836809 | C   | 3.302295  | -1.282253 | 1.275381  | Al  | 1.507320  | 2.306655  | -0.098075 |
| H  | 2.247589  | 2.246269  | -0.484211 | H   | 0.841863  | -1.380421 | -1.729950 | H   | 2.984639  | 2.810519  | -0.675420 |
| H  | 1.200121  | 2.158775  | -1.917521 | H   | 3.227373  | -2.045953 | -2.043390 | H   | 1.824023  | 2.797667  | 1.457632  |
| H  | 0.505649  | -0.182377 | -1.388260 | H   | 4.799904  | -1.973940 | -0.115778 | H   | -0.470523 | 0.073675  | -2.143168 |
| H  | 1.073354  | -0.764212 | -2.058213 | H   | 1.619483  | -0.563484 | 2.413915  | H   | 0.695577  | 3.675944  | -0.539210 |
|    |           |           |           | H   | 3.989008  | -1.229161 | 2.114325  | Li  | 2.368046  | 4.333128  | 0.370575  |
|    |           |           |           | H   | -0.577966 | -0.137131 | 1.551818  | C   | -0.535524 | 0.708256  | -1.245234 |
| K6 |           |           |           | C   | -2.503701 | -0.184529 | -0.170872 | N   | 0.729694  | 0.699854  | -0.528984 |
| Al | -3.437555 | -0.226023 | 0.328863  | C   | -2.792597 | 1.006875  | 0.515159  | C   | -1.770260 | 0.308397  | -0.448293 |
| H  | -4.430173 | 1.022810  | 0.769475  | C   | -4.113560 | 1.424443  | 0.660154  | C   | -1.771300 | 0.270694  | 0.947100  |
| H  | -4.196992 | -1.509779 | 1.047321  | C   | -5.157096 | 0.663412  | 0.131195  | C   | -2.933229 | -0.055404 | 1.649327  |
| H  | 2.232623  | 0.791087  | -2.043027 | C   | -3.553015 | -0.924845 | -0.735557 | C   | -4.112009 | -0.346738 | 0.963868  |
| H  | -3.871248 | -0.441396 | -1.254045 | C   | -4.871111 | -0.512082 | -0.566976 | C   | -2.956491 | 0.007237  | -1.128981 |
| K  | -6.339025 | -0.549036 | -0.254055 | H   | -1.981600 | 1.623423  | 0.892927  | C   | -4.119749 | -0.314863 | -0.431927 |
| C  | 1.446943  | 0.323957  | -1.438382 | H   | -4.326942 | 2.355362  | 1.178261  | H   | -0.850772 | 0.484824  | 1.483283  |
| N  | 0.753337  | 1.361553  | -0.691768 | H   | -6.185383 | 0.993853  | 2.045974  | H   | -2.913877 | -0.086660 | 2.735689  |
| C  | 2.048919  | -0.861388 | -0.692216 | H   | -3.313503 | -1.827193 | -1.290094 | H   | -5.015634 | -0.602552 | 1.510502  |
| C  | 1.253747  | -1.671274 | 0.129800  | H   | -5.677794 | -1.101796 | -0.993440 | H   | -2.968982 | 0.023495  | -2.217766 |
| C  | 1.797888  | -2.771236 | 0.789731  |     |           |           |           | H   | -5.030846 | -0.546056 | -0.977881 |
| C  | 3.149936  | -3.087933 | 0.635455  |     |           |           |           | H   | -0.700706 | 1.728105  | -1.618760 |
| C  | 3.399106  | -1.193610 | -0.844247 | P2* | 31        |           |           | C   | 1.334412  | -0.528284 | -0.262089 |
| C  | 3.949943  | -2.296607 | -0.186895 | Al  | -0.488189 | 1.781047  | 1.406058  | H   | 3.046776  | 6.282135  | 1.100132  |
| H  | 0.200276  | -1.432491 | 0.261419  | H   | 0.822110  | 2.508719  | 1.867343  | H   | 3.479536  | 6.211435  | 0.507733  |
| H  | 1.164617  | -3.385502 | 1.424997  | H   | -1.205023 | 0.558454  | 2.208051  | C   | 2.603515  | -0.554386 | 0.355798  |
| H  | 3.573922  | -3.945490 | 1.151236  | H   | 0.067990  | 0.417810  | -1.695204 | C   | 3.254839  | -1.750241 | 0.629517  |
| H  | 4.030495  | -0.579767 | -1.484450 | H   | -1.899085 | 2.603576  | 1.071149  | C   | 2.666552  | -2.973538 | 0.297758  |
| H  | 5.003119  | -2.533153 | -0.316103 | Li  | -2.859005 | 0.817741  | 1.242494  | C   | 0.748027  | -1.768956 | -0.583284 |
| H  | 0.715458  | -0.069250 | -2.157162 | C   | -0.218445 | 0.218196  | -0.640636 | C   | 1.411716  | -2.964484 | -0.076470 |
| C  | 1.470731  | 2.246185  | 0.240449  | N   | 0.612240  | -0.525450 | 0.136933  | H   | 3.094424  | 0.383048  | 0.619710  |
| C  | 0.466484  | 3.343195  | 0.623913  | C   | -1.678937 | -0.179241 | -0.559909 | H   | 4.232754  | -1.724783 | 1.103842  |
| C  | 1.958498  | 1.548947  | 1.527014  | C   | -2.056089 | -1.299723 | 0.193628  | H   | 3.174417  | -3.909295 | 0.510996  |
| C  | 2.662693  | 2.889990  | -0.477448 | C   | -3.408067 | -1.591832 | 0.397129  | H   | -0.238873 | -1.809474 | -1.030278 |
| H  | 3.106164  | 3.665646  | 0.155773  | C   | -4.400929 | -0.775525 | -0.162826 | H   | 0.927913  | -3.903048 | -0.567214 |
| H  | 3.450583  | 2.161880  | -0.697936 | C   | -2.676289 | 0.613751  | -1.149952 |     |           |           |           |
| H  | 2.342165  | 3.352269  | -1.417334 | C   | -4.031097 | 0.320111  | -0.953223 | 33  |           |           |           |
| H  | 2.414781  | 2.275807  | 2.210495  | H   | -1.254734 | -1.876441 | 0.646589  | P5* |           |           |           |
| H  | 1.120137  | 1.074818  | 2.049372  | H   | -3.689903 | -2.450160 | 1.000642  | Al  | -2.157025 | -2.365909 | 0.149845  |
| H  | 2.700640  | 0.775589  | 1.312335  | H   | -5.451175 | -0.998989 | 0.002010  | H   | -2.832060 | -2.170007 | -1.412867 |
| H  | 0.914033  | 4.054541  | 1.326954  | H   | -2.390987 | 1.489223  | -1.728393 | H   | -3.657069 | -2.364711 | 0.839791  |
| H  | 0.135048  | 3.885334  | -0.267194 | H   | -4.792627 | 0.949713  | -1.404369 | H   | 0.272375  | -1.199067 | -1.743193 |
| H  | -0.417880 | 2.908459  | 1.104254  | H   | -0.264830 | 1.475014  | -0.357303 | H   | -2.026541 | -0.402319 | -1.102573 |
| H  | -0.087338 | 0.993983  | -0.253874 | C   | 1.966536  | -0.362323 | -0.050915 | Li  | -3.835453 | -3.548641 | -0.803894 |
| H  | -1.873432 | -0.050871 | 0.628646  | C   | 2.569250  | 0.627872  | -0.866594 | C   | 0.404447  | -1.318216 | -0.659392 |
|    |           |           |           | C   | 3.958171  | 0.716399  | -0.985205 | N   | -0.801112 | -0.894614 | 0.054504  |
|    |           |           |           | C   | 4.794849  | -0.162755 | -0.302598 | C   | 1.704165  | -0.667240 | -0.221830 |
|    |           |           |           | C   | 2.838630  | -1.237424 | 0.644337  | C   | 1.923118  | -0.286372 | 1.105295  |
|    |           |           |           | C   | 4.215303  | -1.141562 | 0.517398  | C   | 3.148025  | 0.254239  | 1.495086  |
|    |           |           |           | H   | 1.958017  | 1.347040  | -1.405847 | C   | 4.174221  | 0.417720  | 0.564087  |
|    |           |           |           | H   | 4.386534  | 1.490651  | -1.618446 | C   | 2.737654  | -0.497248 | -1.149500 |
|    |           |           |           | H   | 5.874266  | -0.088483 | -0.399001 | C   | 3.965685  | 0.038536  | -0.761975 |
|    |           |           |           | H   | 2.389037  | -1.994531 | 1.281552  | H   | 1.128904  | -0.405257 | 1.837313  |
|    |           |           |           | H   | 4.850900  | -1.835951 | 1.062651  | H   | 3.299834  | 0.549897  | 2.529711  |
|    |           |           |           |     |           |           |           | H   | 5.127496  | 0.840626  | 0.868865  |
|    |           |           |           |     |           |           |           | H   | 2.580190  | -0.785868 | -2.187268 |
|    |           |           |           |     |           |           |           | H   | 4.756208  | 0.164608  | -1.497022 |
|    |           |           |           | P3  | 31        |           |           | H   | 0.496159  | -2.402939 | -0.486326 |
|    |           |           |           | Al  | -0.193830 | 1.770558  | -0.491973 | H   | -1.221584 | 0.457242  | -0.037350 |
|    |           |           |           | H   | 0.731309  | 2.899161  | -1.296060 | C   | -0.845163 | -1.512795 | 1.197564  |
|    |           |           |           | H   | -0.611562 | 2.835399  | 0.718231  | H   | -1.195532 | -2.345860 | 1.743110  |
|    |           |           |           | H   | -0.009507 | -1.836324 | 0.449831  | H   | -2.292484 | 0.874989  | 0.772724  |
|    |           |           |           | H   | -1.540561 | 2.065348  | -1.406360 | C   | -2.754189 | 2.185521  | 0.719911  |
|    |           |           |           | Li  | -0.903261 | 3.853235  | -0.925856 | C   | -2.162913 | 3.112377  | -0.141533 |
|    |           |           |           | C   | -0.343322 | -1.097500 | -0.295518 | C   | -0.631709 | 1.390944  | -0.899570 |
|    |           |           |           | N   | 0.505718  | 0.086422  | -0.198855 | C   | -1.102584 | 2.703912  | -0.946931 |
|    |           |           |           | C   | -1.797508 | -0.781052 | -0.032177 | H   | -2.766269 | 0.165930  | 1.448129  |
|    |           |           |           | C   | -2.187224 | -0.234561 | 1.198951  | H   | -3.582622 | 2.483317  | 1.357165  |
|    |           |           |           | C   | -3.527109 | 0.048565  | 1.459463  | H   | -2.524424 | 4.135669  | -0.182099 |
|    |           |           |           | C   | -4.499382 | -0.215903 | 0.493393  | H   | 0.201493  | 1.104882  | -1.531282 |
|    |           |           |           | C   | -2.781269 | -1.044013 | -0.990890 | H   | -0.628626 | 3.410519  | -1.623257 |
|    |           |           |           | C   | -4.123369 | -0.765583 | -0.732210 |     |           |           |           |

## Mechanism P

25

P-Imine

|   |           |           |           |
|---|-----------|-----------|-----------|
| C | -0.396713 | 0.389084  | -0.176968 |
| N | 0.457833  | -0.51719  | 0.116094  |
| C | -1.843875 | 0.173991  | -0.085838 |
| C | -2.379222 | -1.043309 | 0.366116  |
| C | -3.756131 | -1.215696 | 0.440703  |
| C | -4.618168 | -0.178626 | 0.068097  |
| C | -2.714788 | 1.2082    | -0.457385 |
| C | -4.095391 | 1.033896  | -0.381102 |
| H | -1.695637 | -1.836824 | 0.652008  |
| H | -4.164337 | -2.159808 | 0.790973  |
| H | -5.694103 | -0.317666 | 0.129028  |
| H | -2.304818 | 2.15294   | -0.808253 |
| H | -4.761305 | 1.841656  | -0.671418 |
| H | -0.082257 | 1.383081  | -0.531342 |
| H | 1.828004  | -0.224688 | 0.067944  |
| C | 2.369005  | 0.987741  | 0.527953  |
| C | 3.744215  | 1.207826  | 0.47487   |
| C | 4.597252  | 0.229312  | -0.036594 |
| C | 2.695399  | -1.218467 | -0.411666 |
| C | 4.065403  | -0.984493 | -0.478988 |
| H | 1.713547  | 1.739279  | 0.959718  |



|         |           |           |           |
|---------|-----------|-----------|-----------|
| C       | 1.112491  | -1.234752 | -0.040045 |
| C       | 2.629143  | -1.146946 | 0.205039  |
| C       | 0.536056  | -2.194650 | 1.015228  |
| C       | 0.885280  | -1.790426 | -1.451097 |
| H       | 1.398507  | -2.752779 | -1.555878 |
| H       | -0.173775 | -1.959802 | -1.665162 |
| H       | 1.287212  | -1.107306 | -2.206931 |
| H       | 0.988609  | -3.188062 | 0.915027  |
| H       | 0.749211  | -1.825879 | 2.024102  |
| H       | -0.544341 | -2.313996 | 0.922867  |
| H       | 3.083440  | -2.142935 | 0.168757  |
| H       | 3.118912  | -0.530810 | -0.558331 |
| H       | 2.850888  | -0.726600 | 1.193440  |
| H       | 0.711451  | 0.683670  | 1.356492  |
| H       | 1.149841  | 1.381371  | 1.949185  |
| C       | -3.012433 | 1.367191  | -0.573685 |
| C       | -2.641909 | -1.078116 | -0.482034 |
| C       | -2.102413 | 0.357387  | 1.523003  |
| H       | -3.666920 | -1.216727 | -0.118175 |
| H       | -2.672522 | -1.125471 | -1.577412 |
| H       | -2.056760 | -1.929802 | -0.128535 |
| H       | -3.124612 | 0.239483  | 1.901512  |
| H       | -1.482854 | -0.418859 | 1.980364  |
| H       | -1.725598 | 1.326040  | 1.870106  |
| H       | -4.052907 | 1.185843  | -0.281317 |
| H       | -2.728446 | 2.359703  | -0.205518 |
| H       | -2.975403 | 1.391562  | -1.669968 |
| 37      |           |           |           |
| T6      |           |           |           |
| Al      | -1.209083 | 2.210670  | -0.384833 |
| H       | -2.579705 | 1.966382  | 0.542012  |
| H       | -1.617991 | 3.911187  | -0.415214 |
| H       | 0.750512  | -1.146676 | 1.238608  |
| H       | -0.231337 | 2.557876  | 0.935534  |
| Li      | -1.809849 | 3.601822  | 1.313538  |
| C       | 0.749534  | -0.181020 | 0.718901  |
| N       | -0.440557 | -0.070565 | -0.157303 |
| C       | 2.119577  | -0.040708 | 0.015232  |
| H       | 0.671154  | 0.599048  | 1.485438  |
| C       | -1.490014 | -1.127521 | 0.038585  |
| C       | -2.609698 | -0.852851 | -0.972420 |
| C       | -0.941475 | -2.541238 | -0.223781 |
| C       | -2.044867 | -1.034078 | 1.463095  |
| H       | -2.861431 | -1.752450 | 1.589684  |
| H       | -1.283109 | -1.265420 | 2.214818  |
| H       | -2.431785 | -0.029787 | 1.654132  |
| H       | -1.743343 | -3.277700 | -0.104466 |
| H       | -0.556727 | -2.631451 | -1.245854 |
| H       | -0.141027 | -2.819860 | 0.468067  |
| H       | -3.376781 | -1.630855 | -0.900279 |
| H       | -3.084565 | 0.113559  | -0.785066 |
| H       | -2.226982 | -0.853846 | -1.999565 |
| H       | -0.140281 | -0.146161 | -1.128246 |
| H       | -0.958599 | 1.922198  | -1.941334 |
| C       | 2.251046  | 1.302718  | -0.716805 |
| C       | 3.188867  | -0.112148 | 1.117610  |
| C       | 2.357415  | -1.190831 | -0.975603 |
| H       | 4.192610  | -0.019579 | 0.688168  |
| H       | 3.061420  | 0.697239  | 1.845395  |
| H       | 3.144539  | -1.064852 | 1.658960  |
| H       | 3.353907  | -1.104847 | -1.423214 |
| H       | 2.295534  | -2.166518 | -0.480333 |
| H       | 1.637323  | -1.187208 | -1.802109 |
| H       | 3.248793  | 1.392795  | -1.162288 |
| H       | 1.521349  | 1.409853  | -1.527564 |
| H       | 2.105743  | 2.142917  | -0.030839 |
| 31      |           |           |           |
| T-Amine |           |           |           |
| H       | 0.518124  | -0.533998 | -1.528388 |
| C       | 0.522546  | -0.427556 | -0.427279 |
| N       | -0.521131 | 0.464394  | 0.060543  |
| C       | 1.941126  | 0.006742  | 0.005331  |
| H       | 0.339894  | -1.428538 | -0.019024 |
| C       | -1.919328 | -0.004594 | -0.002739 |
| C       | -2.790923 | 1.198109  | 0.377617  |
| C       | -2.326833 | -0.506394 | -1.401371 |
| C       | -2.131215 | -1.117540 | 1.032222  |
| H       | -3.186743 | -1.407826 | 1.067683  |
| H       | -1.555556 | -2.017620 | 0.793083  |
| H       | -1.829867 | -0.772598 | 2.026015  |
| H       | -3.384641 | -0.792153 | -1.422613 |
| H       | -2.175058 | 0.275355  | -2.155545 |
| H       | -1.742746 | -1.382954 | -1.701050 |
| H       | -3.850438 | 0.923205  | 0.395620  |
| H       | -2.510483 | 1.575035  | 1.366277  |
| H       | -2.672763 | 2.014574  | -0.346094 |
| H       | -0.462273 | 1.348342  | -0.437351 |

|   |          |           |           |
|---|----------|-----------|-----------|
| C | 2.059662 | -0.020397 | 1.534387  |
| C | 2.942420 | -0.982155 | -0.608027 |
| C | 2.248604 | 1.420105  | -0.511920 |
| H | 3.968079 | -0.729914 | -0.315430 |
| H | 2.743937 | -2.007329 | -0.272648 |
| H | 2.895976 | -0.972254 | -1.703757 |
| H | 3.283360 | 1.698918  | -0.281764 |
| H | 2.123180 | 1.482915  | -1.600412 |
| H | 1.600232 | 2.169675  | -0.044735 |
| H | 3.053430 | 0.314551  | 1.854311  |
| H | 1.307383 | 0.629195  | 1.990891  |
| H | 1.908536 | -1.035256 | 1.921814  |

## Mechanism Ga

|     |           |           |           |
|-----|-----------|-----------|-----------|
| 6   |           |           |           |
| Ga0 |           |           |           |
| Ga  | -0.198877 | 0.000000  | -0.000009 |
| H   | 0.633474  | 1.232732  | -0.697327 |
| H   | 0.633468  | -1.220331 | -0.718821 |
| H   | -1.741862 | 0.000001  | 0.000399  |
| H   | 0.633962  | -0.012417 | 1.415997  |
| Li  | 2.002052  | 0.000002  | 0.000007  |

|     |           |           |           |
|-----|-----------|-----------|-----------|
| 33  |           |           |           |
| Ga1 |           |           |           |
| Ga  | -1.362443 | 2.993704  | -0.142659 |
| H   | -1.335582 | 1.958433  | 1.145021  |
| H   | -0.079244 | 3.916711  | -0.067476 |
| H   | -2.778842 | 3.672870  | -0.252885 |
| H   | -1.161796 | 1.885377  | -1.342086 |
| Li  | -0.916939 | 0.649339  | -0.036337 |
| C   | 0.574287  | -1.778147 | 0.015108  |
| N   | -0.607710 | -1.294533 | 0.082325  |
| C   | 1.783722  | -0.945459 | 0.078797  |
| C   | 1.794834  | 0.317175  | 0.693457  |
| C   | 2.944270  | 1.100100  | 0.668852  |
| C   | 4.105252  | 0.620370  | 0.058693  |
| C   | 2.964009  | -1.430588 | -0.504149 |
| C   | 4.116021  | -0.648583 | -0.521825 |
| H   | 0.920632  | 0.685274  | 1.227551  |
| H   | 2.934916  | 2.079204  | 1.137688  |
| H   | 5.002137  | 1.232869  | 0.042936  |
| H   | 2.969363  | -2.415797 | -0.964920 |
| H   | 5.020560  | -1.027612 | -0.988501 |
| H   | 0.747777  | -2.851679 | -0.115428 |
| C   | -1.812208 | -2.151013 | 0.043777  |
| C   | -2.620098 | -1.707085 | -1.186985 |
| C   | -1.532746 | -3.653965 | -0.032896 |
| C   | -2.596839 | -1.830474 | 1.326511  |
| H   | -3.550325 | -2.368117 | 1.330331  |
| H   | -2.029932 | -2.127380 | 2.214646  |
| H   | -2.812075 | -0.759602 | 1.404331  |
| H   | -2.483119 | -4.195415 | -0.032094 |
| H   | -1.002930 | -3.929974 | -0.951300 |
| H   | -0.954300 | -4.007864 | 0.827652  |
| H   | -3.566262 | -2.255217 | -1.234460 |
| H   | -2.859237 | -0.638340 | -1.151613 |
| H   | -2.064244 | -1.898837 | -2.110249 |

|      |           |           |           |
|------|-----------|-----------|-----------|
| 33   |           |           |           |
| Ga2* |           |           |           |
| Ga   | 0.187974  | 2.240610  | 0.232357  |
| H    | 1.705710  | 2.587756  | 0.083470  |
| H    | 0.176607  | 0.891457  | -1.120806 |
| H    | -0.957991 | 3.039749  | -0.491400 |
| H    | -0.307926 | 1.662770  | 1.654906  |
| Li   | 0.569339  | 0.078127  | 1.957574  |
| C    | 0.163275  | -0.215323 | -0.712471 |
| N    | 1.088925  | -0.502077 | 0.311032  |
| C    | -1.292816 | -0.497395 | -0.361321 |
| C    | -1.614789 | -1.535474 | 0.519725  |
| C    | -2.946264 | -1.849069 | 0.799113  |
| C    | -3.977842 | -1.119294 | 0.208802  |
| C    | -2.336473 | 0.226312  | -0.951734 |
| C    | -3.666693 | -0.083797 | -0.674322 |
| H    | -0.800474 | -2.112339 | 0.951600  |
| H    | -3.177149 | -2.667294 | 1.476857  |
| H    | -5.014828 | -1.358074 | 0.428747  |
| H    | -2.105506 | 1.041832  | -1.633163 |
| H    | -4.462327 | 0.491614  | -1.140241 |
| H    | 0.372991  | -0.709558 | -1.680793 |
| C    | 2.398162  | -1.002351 | -0.104827 |
| C    | 3.251818  | -1.075000 | 1.168420  |
| C    | 2.297135  | -2.419819 | -0.706946 |
| C    | 3.112625  | -0.077926 | -1.112567 |
| H    | 4.105298  | -0.465244 | -1.372251 |
| H    | 2.546988  | 0.011933  | -2.047596 |
| H    | 3.232283  | 0.926767  | -0.695301 |

|   |          |           |           |
|---|----------|-----------|-----------|
| H | 3.279956 | -2.808674 | -1.001416 |
| H | 1.855402 | -3.107828 | 0.022200  |
| H | 1.664047 | -2.430537 | -1.602104 |
| H | 4.250623 | -1.480100 | 0.971544  |
| H | 3.378402 | -0.072871 | 1.599191  |
| H | 2.771357 | -1.725296 | 1.912302  |

|     |           |           |           |
|-----|-----------|-----------|-----------|
| 33  |           |           |           |
| Ga3 |           |           |           |
| Ga  | 0.877121  | -1.731516 | -0.238418 |
| H   | -0.163913 | -1.769562 | -1.528678 |
| H   | 0.199277  | -2.386934 | 1.036565  |
| H   | 0.075967  | 1.601368  | 1.476715  |
| C   | -0.083904 | 0.576382  | 1.122196  |
| N   | 0.821403  | 0.258171  | 0.004372  |
| C   | -1.519994 | 0.478695  | 0.634924  |
| C   | -2.017812 | 1.453885  | -0.249314 |
| C   | -3.307186 | 1.358538  | -0.778738 |
| C   | -4.117139 | 0.270899  | -0.444362 |
| C   | -2.344663 | -0.606156 | 0.954232  |
| C   | -3.636758 | -0.700509 | 0.433194  |
| H   | -1.399291 | 2.319807  | -0.486009 |
| H   | -3.679941 | 2.133616  | -1.443396 |
| H   | -5.119339 | 0.189760  | -0.855559 |
| H   | -1.964841 | -1.381882 | 1.612209  |
| H   | -4.261335 | -1.549521 | 0.696953  |
| H   | 0.045464  | -0.088196 | 1.990280  |
| C   | 2.138817  | 0.937796  | 0.020974  |
| C   | 2.790560  | 0.689107  | -1.346418 |
| C   | 2.005066  | 2.462270  | 0.191208  |
| C   | 3.043401  | 0.385232  | 1.135990  |
| H   | 4.013681  | 0.894967  | 1.156678  |
| H   | 2.576482  | 0.518769  | 2.118471  |
| H   | 3.225016  | -0.684185 | 0.987561  |
| H   | 2.973723  | 2.940351  | 0.010923  |
| H   | 1.289074  | 2.874002  | -0.530532 |
| H   | 1.690358  | 2.758071  | 1.197123  |
| H   | 3.795678  | 1.122309  | -1.384524 |
| H   | 2.876442  | -0.380884 | -1.554541 |
| H   | 2.196738  | 1.154545  | -2.144411 |
| Li  | -0.431979 | 0.181625  | -1.456402 |
| H   | 2.283806  | -2.289306 | -0.669609 |

|     |           |           |           |
|-----|-----------|-----------|-----------|
| 35  |           |           |           |
| Ga4 |           |           |           |
| Ga  | -1.904666 | -0.943474 | -0.788121 |
| H   | -3.402159 | -0.395576 | -1.207066 |
| H   | -2.348161 | -1.977441 | 0.411100  |
| H   | 0.652400  | 1.653490  | -1.276466 |
| H   | -1.230413 | -1.734865 | -1.988033 |
| Li  | -4.313361 | -1.686493 | 0.107179  |
| C   | 0.496755  | 0.596587  | -0.114440 |
| N   | -0.686160 | 0.408024  | -0.198616 |
| C   | 1.810787  | 0.064488  | -0.445765 |
| C   | 1.835702  | -0.960402 | 0.499615  |
| C   | 3.043620  | -1.481175 | 0.959233  |
| C   | 4.252512  | -0.980357 | 0.481572  |
| C   | 3.030024  | 0.559848  | -0.918390 |
| C   | 4.240768  | 0.046212  | -0.461188 |
| H   | 0.889259  | -1.335445 | 0.875736  |
| H   | 3.041631  | -2.280514 | 1.694762  |
| H   | 5.194261  | -1.382659 | 0.841717  |
| H   | 3.031218  | 1.362662  | -1.652629 |
| H   | 5.176299  | 0.450054  | -0.837135 |
| H   | 0.357988  | 0.088034  | -1.976663 |
| C   | -1.080708 | 1.552896  | 0.636743  |
| C   | -2.171660 | 1.100185  | 1.612493  |
| C   | 0.099482  | 2.080354  | 1.472650  |
| C   | -1.643325 | 2.710020  | -0.216630 |
| H   | -1.940795 | 3.561224  | 0.406478  |
| H   | -0.900803 | 3.072585  | -0.934440 |
| H   | -2.519189 | 2.371566  | -0.778838 |
| H   | -0.225806 | 2.912759  | 2.105947  |
| H   | 0.498562  | 1.291647  | 2.116006  |
| H   | 0.915328  | 2.445616  | 0.842896  |
| H   | -2.476798 | 1.927907  | 2.262070  |
| H   | -3.061167 | 0.758450  | 1.073052  |
| H   | -1.810721 | 0.281782  | 2.242087  |
| H   | -2.966768 | -0.463593 | 2.760381  |
| H   | -3.570071 | -6.888621 | 2.867997  |

|      |          |           |           |
|------|----------|-----------|-----------|
| 35   |          |           |           |
| Ga5* |          |           |           |
| Ga   | 2.425142 | -0.974616 | -0.076076 |
| H    | 3.126186 | -0.427452 | 1.380401  |
| H    | 3.825534 | -0.862604 | -0.       |



C -0.256864 -0.678643 0.654187  
N 0.709888 0.070478 -0.160708  
C -1.724859 -0.547615 0.311613  
C -2.175723 -0.769890 -0.995384  
C -3.533320 -0.697239 -1.298888  
C -4.463609 -0.400844 -0.299529  
C -2.664657 -0.269964 1.308282  
C -4.025361 -0.187525 1.006540  
H -1.453078 -1.000389 -1.775257  
H -3.868289 -0.873125 -2.317869  
H -5.521822 -0.339256 -0.538578  
H -2.328111 -0.104356 2.329903  
H -4.741340 0.039590 1.792152  
H 0.005659 -1.738926 0.510196  
C 0.760404 1.555095 -0.083785  
C 1.978046 1.981211 -0.917254  
C -0.494001 2.022240 -0.689841  
C 0.939803 2.031096 1.364462  
H 1.078937 3.117890 1.387078  
H 0.059868 1.803582 1.975254  
H 1.813982 1.560891 1.824743  
H -0.367123 3.290605 -0.714161  
H -0.656763 1.853576 -1.714328  
H -1.393240 1.982737 -0.110431  
H 2.052408 3.072764 -0.950519  
H 2.910978 1.600390 -0.486131  
H 1.898693 1.612135 -1.945246  
H 0.842094 -0.561393 -1.267619  
H 1.343441 -1.337537 -1.798314

### 35

#### Ga6

Ga 3.012688 -1.185430 -0.114423  
H 3.780398 0.239028 -0.361128  
H 4.440775 -2.045692 0.011966  
H -0.133258 -0.339802 1.513200  
H 2.780843 -1.060307 1.496082  
Li 4.723867 -0.624364 1.144515  
C -0.323430 -0.536497 0.453249  
N 0.455993 0.409217 -0.333423  
C -1.823955 -0.631630 0.225846  
C -2.344731 -0.896317 -1.047204  
C -3.718622 -1.008928 -1.251713  
C -4.601970 -0.867295 -0.179408  
C -2.719428 -0.505862 1.293137  
C -4.096847 -0.618076 1.095953  
H -1.668476 -0.1018824 -1.891200  
H -4.101560 -1.214227 -2.248129  
H -5.673425 -0.954306 -0.337561  
H -2.333473 -0.310996 2.292003  
H -4.774489 -0.510848 1.939151  
H 0.114762 -1.524583 0.256484  
C 0.358589 1.862568 -0.101244  
C 1.347922 2.506665 -1.082265  
C -1.042213 2.454354 -0.346033  
C 0.808350 2.168871 1.332731  
H 0.888762 3.251094 1.479559  
H 0.096017 1.794177 2.075438  
H 1.783235 1.712124 1.528931  
H -1.022667 3.543885 -0.222693  
H -1.385476 2.236437 -1.363554  
H -1.783333 2.050289 0.348521  
H 1.358649 3.595034 -0.961901  
H 2.357060 2.118099 -0.919746  
H 1.063595 2.292446 -2.120378  
H 0.367517 0.210196 -1.325235  
H 2.025680 -1.873446 -1.100577

## Mechanism Bo

### 6

#### Bo0

B -0.506897 0.000003 -0.000017  
H -0.030240 -0.843462 -0.786302  
H -0.028959 -0.258962 1.123108  
H -1.705517 -0.000106 0.000910  
H -0.029984 1.102596 -0.337724  
Li 1.443061 -0.000027 0.000030

### 33

#### Bo1

B 0.958611 3.834816 0.287235  
H 0.604773 3.339647 -0.798451  
H 1.001019 5.036191 0.245964  
H 2.065858 3.335733 0.559254  
H 0.159368 3.421304 1.146117  
Li 0.888031 1.846918 0.367567  
C 0.055655 -0.946612 -0.075549  
N 1.035331 -0.128014 0.005870

C -1.358270 -0.545428 -0.075116  
C -1.786412 0.750039 -0.407091  
C -3.138190 1.074775 -0.360345  
C -4.081098 0.112066 0.007728  
C -2.316753 -1.512152 0.266742  
C -3.669047 -1.184407 0.317336  
H -1.078511 1.505297 -0.739732  
H -3.455453 2.080232 -0.619951  
H -5.135638 0.370527 0.042322  
H -1.995391 -2.523229 0.506949  
H -4.399616 -1.938871 0.594312  
H 0.223999 -2.027096 -0.135884  
C 2.440262 -0.596677 -0.033699  
C 3.095849 -0.120048 1.273079  
C 2.613765 -2.111597 -0.173783  
C 3.090994 0.114407 -1.232022  
H 4.158111 -0.125650 -1.277418  
H 2.625979 -0.201482 -2.171307  
H 2.993690 1.202223 -1.151505  
H 3.681729 -2.345765 -0.204310  
H 2.185294 -2.657978 0.673915  
H 2.170299 -2.493853 -1.099808  
H 4.156921 -0.388319 1.281368  
H 3.034639 0.968968 1.381801  
H 2.617927 -0.582819 2.142721

### 33

#### Bo2\*

C -0.342213 0.995843 0.656854  
N -1.547023 0.595775 0.108492  
C 0.997682 0.392372 0.290507  
C 1.468178 0.419048 -0.127704  
C 2.714002 -0.114393 -1.345307  
C 3.505099 -0.689514 -0.346996  
C 1.808476 -0.157555 1.288143  
C 3.049780 -0.711566 0.970776  
H 0.846403 0.864007 -1.800301  
H 3.072479 -0.080444 -2.370701  
H 4.476260 -1.108908 -0.595456  
H 1.462562 -0.156321 2.319900  
H 3.663271 -1.150302 1.753155  
H -0.336689 1.252008 1.733509  
C -1.912784 -0.811877 -0.067888  
C -3.392450 -0.791323 -0.486154  
C -1.133650 -1.572671 -1.161878  
C -1.797344 -1.589182 1.259230  
H -2.174367 -2.614171 1.157242  
H -0.753656 -1.653095 1.585553  
H -2.372274 -1.085926 2.044584  
H -1.578716 -2.561391 -1.329915  
H -1.165376 -1.018431 -2.106301  
H -0.086828 -1.724721 -0.891156  
H -3.788017 -1.803921 -0.622177  
H -3.998378 -0.288708 0.277610  
H -3.512318 -0.259632 -1.440033  
B -0.633630 3.471455 0.031543  
H -1.568249 3.560042 0.805544  
H -0.134686 2.197636 0.261455  
H 0.315162 4.160010 0.266638  
H -0.928500 3.281127 -1.135552  
Li -2.409810 2.149451 -0.336082

### 33

#### Bo3

B -1.040349 -1.487892 1.351321  
H 0.149708 -1.819232 1.446749  
H -1.720631 -2.454949 1.082584  
H -0.425961 0.001188 -1.701110  
C -0.146662 -0.585875 -0.818291  
N -1.057834 -0.302159 0.300249  
C 1.286670 -0.224636 -0.464695  
C 1.595991 1.073453 -0.021813  
C 2.902219 1.424670 0.331313  
C 3.925678 0.479995 0.244976  
C 2.326989 -1.157106 -0.547898  
C 3.633105 -0.809415 -0.201552  
H 0.805790 1.823797 0.005219  
H 3.121442 2.438742 0.656129  
H 4.942133 0.747407 0.519625  
H 2.103320 -2.170118 -0.872450  
H 4.423138 -1.552715 -0.267403  
H -0.183055 -1.644107 -1.120403  
C -2.384201 0.231083 -0.113950  
C -3.271184 0.397469 1.126469  
C -2.226126 1.622314 -0.754225  
C -3.096168 -0.714472 -1.099890  
H -4.100072 -0.344137 -1.336480  
H -2.549806 -0.803427 -2.045496  
H -3.191176 -1.714000 -0.665476

H -3.204157 2.022010 -1.044082  
H -1.774323 2.322838 -0.041702  
H -1.606668 1.609082 -1.657154  
H -4.219784 0.864065 0.839846  
H -3.487176 -0.562522 1.600330  
H -2.790982 1.041626 1.872828  
Li 0.125379 0.113357 1.774762  
H -1.339166 -1.015932 2.463696

### 35

#### Bo4

B -1.121600 1.676480 -0.080074  
H -1.791111 2.264641 0.846640  
H -1.575438 2.180702 -1.133850  
H -0.252384 -1.352735 1.142290  
H 0.018100 2.171923 0.034191  
Li -1.089547 3.622048 -0.103701  
C -0.063457 -0.297442 0.909509  
N -1.070484 0.188287 -0.020654  
C 1.362439 -0.212437 0.390879  
C 1.647528 -0.280788 -0.976238  
C 2.965878 -0.263801 -1.431962  
C 4.024741 -0.177323 -0.526405  
C 2.430795 -0.118708 1.290307  
C 3.751281 -0.103797 0.840172  
H 0.814609 -0.331119 -1.671792  
H 3.167926 -0.317236 -2.499229  
H 5.051924 -0.162968 -0.881608  
H 2.225228 -0.052683 2.357653  
H 4.566253 -0.029595 1.556168  
H -0.103048 0.224694 1.884593  
C -2.322575 -0.597705 -0.068983  
C -3.296565 0.058590 -1.056477  
C -2.039330 -2.019361 -0.589728  
C -3.007982 -0.678856 1.311764  
H -3.962988 -1.213896 1.247875  
H -2.383805 -1.206627 2.041242  
H -3.204924 0.326468 1.699636  
H -2.970567 -2.593331 -0.657344  
H -1.587602 -1.973107 -1.585971  
H -1.362365 -2.582057 0.60754  
H -4.184465 -0.571923 -1.174011  
H -3.626077 1.041664 -0.707855  
H -2.827946 0.182866 -2.038083  
H -1.000147 5.798835 -0.439088  
H -1.357671 5.778695 0.216817

### 35

#### Bo5\*

B -2.574633 1.650758 -0.097562  
H -3.054302 1.051327 1.103817  
H -3.611983 1.588989 -0.750920  
H -0.471808 1.057466 1.608771  
H -2.415682 2.782419 0.369620  
Li -4.128447 2.327937 0.944814  
C -0.211392 1.137262 0.550250  
N -1.337273 0.556833 -0.242652  
C 1.182686 0.625705 0.284005  
C 1.784329 0.854104 -0.961575  
C 3.089038 0.433640 -1.207607  
C 3.820612 -0.211045 -0.207037  
C 1.930550 -0.002891 1.284977  
C 3.240218 -0.421769 1.043078  
H 1.218661 1.368833 -1.736476  
H 3.540111 0.616046 -2.179408  
H 4.838827 -0.538233 -0.399031  
H 1.487462 -0.163855 2.265598  
H 3.805949 -0.910204 1.832104  
H -0.242782 2.197519 0.269063  
C -1.618038 -0.936561 -0.149226  
C -2.988128 -1.191540 -0.791385  
C -0.564517 -1.709839 -0.956809  
C -1.622543 -1.424126 1.301078  
H -1.902675 -2.483876 1.318109  
H -0.633594 -1.341738 1.761192  
H -2.342850 -0.863668 1.901501  
H -0.841907 -2.769494 -0.977554  
H -0.522629 -1.354439 -1.992026  
H 0.435193 -1.633999 -0.527337  
H -3.154006 -2.271715 -0.859920  
H -3.793805 -0.753477 -0.199601  
H -3.035544 -0.773460 -1.802091  
H -1.165793 0.855804 -1.230458  
H -1.774322 2.286681 -1.561513

### 35

#### Bo6

B 0.696717 3.701893 0.291709  
H -0.289965 3.378621 0.975332

H 1.695358 3.213002 0.848249  
H 0.248038 -1.835012 -1.016202  
H 0.580317 3.119601 -0.802665  
Li 0.530469 1.723558 0.513829  
C 0.091834 -0.765098 -0.823883  
N 0.979945 -0.260025 0.251389  
C -1.349876 -0.524289 -0.445498  
C -1.957763 0.713435 -0.694116  
C -3.270882 0.953236 -0.288889  
C -3.995699 -0.045355 0.361668  
C -2.088025 -1.520277 0.205474  
C -3.403180 -1.284821 0.605708  
H -1.408734 1.497219 -1.214567  
H -3.724825 1.920166 -0.485046  
H -5.019608 0.140005 0.673619  
H -1.633281 -2.491727 0.390372  
H -3.965463 -2.069401 1.104526  
H 0.331349 -0.225979 -1.745326  
C 2.451410 -0.491303 0.080170  
C 3.111355 0.037642 1.359211  
C 2.784188 -1.981389 -0.088146  
C 2.954168 0.307599 -1.126522  
H 4.044232 0.233116 -1.188558  
H 2.549860 -0.073127 -2.069821  
H 2.695022 1.368335 -1.039640  
H 3.869201 -2.123383 -0.117558  
H 2.395432 -2.571740 0.750478  
H 2.378961 -2.394130 -1.017170  
H 4.194984 -0.107311 1.316350  
H 2.923914 1.108935 1.491872  
H 2.742367 -0.493192 2.245632  
H 0.703774 -0.744591 1.107305  
H 0.789282 4.894339 0.162261

## Mechanism AN

58

Li(THF)<sub>4</sub> AlH<sub>4</sub>

Li -0.022951 -0.035203 0.086842  
O 1.948022 -0.633607 0.384476  
O -0.963294 0.329538 1.879714  
O -1.286203 0.176647 -1.584493  
O 0.635807 2.004061 -0.204670  
C 2.227269 -1.413785 1.566775  
C -1.340390 -0.707336 2.808001  
C -2.656999 -0.245068 -1.400357  
C 1.795999 2.580214 0.401154  
C 2.725719 -1.141427 -0.724764  
C -1.670881 1.543843 2.190501  
C -0.795223 -0.325376 -2.846702  
C 0.027536 3.047070 -0.964901  
C 3.477245 -2.361674 -0.198167  
C -2.534463 1.239856 3.417714  
C -2.037522 -0.622687 -3.672984  
C 1.197554 3.768618 -1.635566  
C 3.571412 -2.075577 1.302852  
C -2.699379 -0.281116 3.340437  
C -2.999907 -1.131059 -2.595968  
C 2.351633 3.590915 -0.621167  
H 2.225239 -0.728607 2.420437  
H -1.334560 -1.650355 2.257451  
H -2.727034 -0.781816 -0.449676  
H 1.502401 3.086508 1.333568  
H 2.045816 -1.401309 -1.541682  
H -0.943323 2.343472 2.365877  
H -0.144491 0.442947 -3.277126  
H -0.682577 2.579466 -1.648344  
H 1.436752 -2.164405 1.691282  
H -0.594980 -0.754005 3.615032  
H -3.280807 0.658296 -1.361087  
H 2.470367 1.757384 0.642108  
H 3.404810 -0.341967 -1.050334  
H -2.280173 1.814734 1.319723  
H -0.217978 -1.241607 -2.666643  
H -0.517881 3.725340 -0.288290  
H 4.395621 -1.385719 1.522253  
H -3.488133 -0.553753 2.630395  
H -2.784682 -2.177311 -2.355281  
H 2.618386 4.533839 -0.134789  
H 2.882835 -3.263833 -0.374326  
H -2.006928 1.516510 4.337605  
H -2.419972 0.290928 -4.144479  
H 1.441721 3.286486 -2.586857  
H 3.709092 -2.980254 1.901428  
H -2.935475 -0.739163 4.304960  
H -4.052616 -1.050229 -2.882224  
H 3.251808 3.209090 -1.110423  
H 4.451842 -2.486741 -0.678876  
H -3.483717 1.782903 3.399994

H -1.844254 -1.360751 -4.456338  
H 0.971082 4.818591 -1.842365  
Al -0.443082 -3.455859 -0.424307  
H -1.933320 -4.013979 -0.763648  
H 0.332123 -4.281041 0.749340  
H -0.629842 -1.910252 0.146978  
H 0.479492 -3.317721 -1.771542

53

Li(THF)<sub>4</sub>(+)

Li 0.000000 -0.000000 -0.000000  
O -1.205900 -1.153057 1.079690  
O 1.205976 -1.152975 -1.079693  
O 1.205905 1.153053 1.079688  
O -1.205981 1.152978 -1.079684  
C -2.163915 -1.987147 0.389384  
C 2.164036 -1.987014 -0.389390  
C 2.163915 1.987147 0.389380  
C -2.164037 1.987016 -0.389373  
C -1.231059 -1.444566 2.495188  
C 1.231158 -1.444472 -2.495194  
C 1.231071 1.444557 2.495187  
C -1.231170 1.444480 -2.495183  
C -2.081697 -2.700229 2.646272  
C 2.081870 -2.700083 -2.646283  
C 2.081709 2.700219 2.646271  
C -2.081882 2.700092 -2.646264  
C -3.059054 -2.565956 1.476031  
C 3.059214 -2.565763 -1.476037  
C 3.059060 2.565952 1.476024  
C -3.059220 2.565768 -1.476014  
H -2.691081 -1.363131 -0.337963  
H 2.691163 -1.362973 0.337964  
H 2.691078 1.363134 -0.337972  
H -2.691161 1.362973 0.337981  
H -0.200581 -1.570696 2.840601  
H 0.200689 -1.570659 -2.840613  
H 0.200595 1.570685 2.840606  
H -0.200703 1.570668 -2.840607  
H -1.620150 -2.774762 -0.148175  
H 1.620315 -2.774665 0.148161  
H 1.620148 2.774764 -0.148173  
H -1.620313 2.774664 0.148178  
H -1.677249 -0.589050 3.017680  
H 1.677301 -0.588926 -3.017677  
H 1.677265 0.589039 3.017673  
H -1.677315 0.588935 -3.017667  
H -3.865329 -1.866449 1.724768  
H 3.865449 -1.866207 -1.724765  
H 3.865336 1.866444 1.724755  
H -3.865456 1.866213 -1.724741  
H -1.465895 -3.599396 2.530784  
H 1.466120 -3.599287 -2.530806  
H 1.465907 3.599386 2.530791  
H -1.466131 3.599295 -2.530787  
H -3.512496 -3.515824 1.180254  
H 3.512709 -3.515607 -1.180265  
H 3.512500 3.515821 1.180249  
H -3.512713 3.515611 -1.180237  
H -2.576192 -2.751557 3.619977  
H 2.576373 -2.751375 -3.619987  
H 2.576210 2.751544 3.619974  
H -2.576389 2.751387 -3.619965

6

ANO Li(+) ---- AlH<sub>4</sub>(-)

Al -3.643006 0.042370 -0.491863  
H -2.361406 0.091328 0.547571  
H -3.940228 1.559590 -1.070678  
H -4.977376 -0.513846 0.305333  
H -3.293194 -0.967920 -1.749805  
Li 20.643762 -0.239989 2.787267

5

ANO

Al 0.000023 0.000000 -0.000003  
H 0.953268 1.347798 -0.009257  
H 0.953037 -1.347976 -0.006739  
H -0.964629 -0.001169 -1.339736  
H -0.941978 0.001347 1.355765

32

AN1

C -0.903783 0.488388 0.004510  
N -0.062691 -0.464632 0.004539  
C -2.361734 0.245886 0.000077  
C -2.891022 -1.053923 -0.004091  
C -4.267280 -1.253663 -0.008243  
C -5.141034 -0.160818 -0.008312

C -3.244061 1.333984 -0.000020  
C -4.624956 1.134736 -0.004184  
H -2.195830 -1.888249 -0.003998  
H -4.665732 -2.265390 -0.011473  
H -6.216363 -0.320789 -0.011584  
H -2.840868 2.344894 0.003166  
H -5.296165 1.989991 -0.004231  
H -0.610156 1.547981 0.007644  
C 1.387776 -0.216967 0.008721  
C 1.942094 -0.910389 -1.246284  
C 1.811339 1.255079 0.014350  
C 1.936144 -0.918219 1.261967  
H 3.029498 -0.854834 1.283413  
H 1.541110 -0.447141 2.169782  
H 1.638825 -1.972106 1.266515  
H 2.904361 1.323775 0.017327  
H 1.449969 1.785823 -0.875509  
H 1.445140 1.780346 0.905516  
H 3.035415 -0.846210 -1.262959  
H 1.645256 -1.964347 -1.258605  
H 1.551176 -0.433908 -2.153010  
Al 6.013794 0.223954 -0.012670  
H 7.649896 0.389391 -0.001445  
H 5.515370 -0.634492 1.304395  
H 5.526360 -0.565673 -1.375945  
H 5.291349 1.707388 0.022983

32

AN2\*

Al -0.510375 2.601542 -0.541193  
H -2.104134 2.796735 -0.513453  
H 0.277346 2.199716 -1.873994  
H -0.386408 -0.097932 1.611098  
H 0.249331 3.818477 0.260734  
C -0.191844 0.221598 0.561397  
N -1.088035 -0.154286 -0.402333  
C 1.276614 -0.069084 0.268738  
C 1.629530 -0.799143 -0.866876  
C 2.966481 -1.113089 -1.119373  
C 3.966987 -0.705930 -0.234849  
C 2.284761 0.350549 1.143809  
C 3.620230 0.029929 0.902146  
H 0.815704 -1.093125 -1.524798  
H 3.230072 -1.675977 -2.013066  
H 5.008590 -0.953602 -0.429762  
H 2.016697 0.941735 2.019035  
H 4.392064 0.358090 1.595744  
H -0.140728 1.440025 0.848839  
C -2.369800 -0.662058 0.060251  
C -3.258999 -0.788726 -1.185621  
C -2.214203 -2.069855 0.691309  
C -3.101950 0.243484 1.080689  
H -4.079751 -0.176484 1.357482  
H -2.523090 0.355161 2.006968  
H -3.254043 1.241502 0.659268  
H -3.177657 -2.492179 1.015954  
H -1.758691 -2.749865 -0.037528  
H -1.556246 -2.032562 1.569294  
H -4.240339 -1.223569 -0.947983  
H -3.404563 0.199477 -1.634561  
H -2.759877 -1.421720 -1.928236

32

AN3

Al 2.051204 2.046440 -0.341369  
H 3.627032 1.887767 -0.803967  
H 2.008261 2.810752 1.113974  
H 0.175453 -0.800196 -1.762416  
H 1.190452 2.883509 -1.459659  
C 0.065830 0.115645 -1.149437  
N 1.178217 0.341902 -0.262021  
C -1.325479 0.072986 -0.514527  
C -1.596646 0.785185 0.659123  
C -2.880435 0.803865 1.204514  
C -3.922289 0.104869 0.589186  
C -2.377657 -0.621564 -1.123969  
C -3.664064 -0.611139 -0.581337  
H -0.771869 1.312981 1.132296  
H -3.070130 1.367639 2.115981  
H -4.922177 0.115550 1.017867  
H -2.182543 -1.184876 -2.036596  
H -4.463717 -1.166444 -1.068531  
H 0.032502 0.944248 -1.874692  
C 1.821476 -0.859754 0.277830  
C 2.752072 -0.438279 1.424830  
C 0.810820 -1.876325 0.849863  
C 2.676855 -1.567189 -0.802530  
H 3.174492 -2.465334 -0.409068  
H 2.057337 -1.878310 -1.652727

H 3.438763 -0.874032 -1.173921  
H 1.338557 -2.738966 1.278582  
H 0.203588 -1.414969 1.635665  
H 0.128438 -2.255719 0.081346  
H 3.266219 -1.311465 1.847999  
H 3.513097 0.266287 1.070791  
H 2.180171 0.054757 2.217735

34  
AN4

AI 2.127355 1.662208 -0.800802  
H 3.673203 1.290292 -1.237682  
H 2.187345 2.703844 0.472137  
H -0.007156 -1.243579 -1.591211  
H 1.301857 2.331699 -2.049483  
C -0.026269 -0.218275 -1.173208  
N 1.127779 0.087514 -0.366258  
C -1.396094 -0.019196 -0.521666  
C -1.573888 0.928103 0.492695  
C -2.834845 1.159951 1.042440  
C -3.947044 0.444099 0.591854  
C -2.518077 -0.728910 -0.967100  
C -3.782331 -0.505322 -0.418589  
H -0.695870 1.467336 0.840522  
H -2.951266 1.904321 1.827877  
H -4.929326 0.621691 1.024512  
H -2.396238 -1.473561 -1.753802  
H -4.638000 -1.075957 -0.775412  
H -0.017764 0.448992 -2.049750  
C 1.692380 -1.031215 0.395096  
C 2.686550 -0.466752 1.420948  
C 0.624191 -1.827781 1.173684  
C 2.457901 -2.006720 -0.532893  
H 2.895932 -2.846149 0.026142  
H 1.791247 -2.429162 -1.294792  
H 3.260017 -1.466323 -1.046169  
H 1.097014 -2.627806 1.759163  
H 0.078231 -1.171824 1.859726  
H -0.108180 -2.295812 0.506819  
H 3.145284 -1.276922 2.003164  
H 3.488300 0.089466 0.922175  
H 2.178042 0.218316 2.107223  
H 3.249746 4.799840 1.084341  
H 3.552674 5.442104 1.319178

34  
AN5\*

AI 2.775557 -1.787698 0.188696  
H 3.421107 -0.966314 1.495854  
H 4.003995 -1.875611 -0.869516  
H 0.266440 -0.373466 1.868575  
H 2.130607 -3.147426 0.805117  
C 0.099060 -0.757090 0.855635  
N 1.191434 -0.341561 -0.030466  
C -1.319393 -0.457833 0.410464  
C -1.758606 -0.874676 -0.854888  
C -3.075911 -0.659207 -1.253722  
C -3.981682 -0.024969 -0.397676  
C -2.235312 0.167458 1.262952  
C -3.557054 0.386047 0.865440  
H -1.045195 -1.372404 -1.513073  
H -3.400162 -0.989908 -2.238058  
H -5.008749 0.144605 -0.712963  
H -1.909030 0.490399 2.250239  
H -4.251991 0.879154 1.541953  
H 0.192390 -1.850264 0.924659  
C 1.499449 1.101530 -0.192636  
C 2.801331 1.180244 -1.004562  
C 0.398901 1.852854 -0.964536  
C 1.720756 1.766666 1.172718  
H 2.095415 2.788694 1.032613  
H 0.789802 1.835585 1.747708  
H 2.453236 1.192762 1.749096  
H 0.711026 2.891164 -1.137706  
H 0.219814 1.381679 -1.936821  
H -0.548266 1.873492 -0.419087  
H 3.047535 2.227510 -1.219652  
H 3.631911 0.731688 -0.450434  
H 2.700474 0.642059 -1.952852  
H 1.114332 -0.923285 -0.970740  
H 1.413787 -2.035265 -1.629829

34  
AN6

AI 2.195712 3.257627 -0.096130  
H 2.959629 2.577059 1.190182  
H 0.752567 3.895135 0.371382  
H -0.433787 -1.945807 -1.664908  
H 3.138671 4.395847 -0.806717

C -0.196151 -0.890644 -1.475178  
N 1.157510 -0.790697 -0.963176  
C -1.352531 -0.273030 -0.693825  
C -1.303379 1.063661 -0.274414  
C -2.377011 1.632993 0.407313  
C -3.524439 0.881485 0.676307  
C -2.506865 -1.015659 -0.421234  
C -3.587884 -0.447621 0.257976  
H -0.414768 1.663622 -0.465822  
H -2.306064 2.668397 0.730323  
H -4.359787 1.327931 1.211090  
H -2.559433 -2.055896 -0.741245  
H -4.473769 -1.044958 0.464393  
H -0.176205 -0.408879 -2.462655  
C 1.559949 -1.472153 0.274671  
C 3.083655 -1.297514 0.363915  
C 0.927326 -0.894593 1.558472  
C 1.229847 -2.967081 0.168645  
H 1.657789 -3.507553 1.020797  
H 0.148995 -3.149129 0.176838  
H 1.646092 -3.386931 -0.754398  
H 1.331897 -1.399975 2.445630  
H 1.150810 0.173526 1.645905  
H -0.159343 -1.019335 1.565226  
H 3.479092 -1.787233 1.262019  
H 3.567604 -1.728116 -0.519329  
H 3.342885 -0.234430 0.415756  
H 1.476666 0.181312 -0.963136  
H 1.868537 2.052069 -1.185293

59  
AN7

AI -1.739196 -0.841005 -0.154223  
H -1.027967 -2.218141 -0.718621  
H -1.239692 -0.621101 1.397122  
H -4.956966 -0.370691 -1.893918  
H -1.286753 0.445043 -1.067745  
C -4.281507 0.079343 -1.141291  
N -3.639383 -0.900957 -0.301260  
C -5.062245 1.189010 -0.434660  
C -4.709292 1.630995 0.854005  
C -5.376843 2.666038 1.473681  
C -6.417282 3.323283 0.817675  
C -6.104879 1.861909 -1.083554  
C -6.780061 2.917442 -0.468049  
H -3.906223 1.070160 1.356585  
H -5.083655 2.969402 2.475204  
H -6.940900 4.143956 1.303195  
H -6.395343 1.548558 -2.086314  
H -7.593148 3.419531 -0.989272  
H -3.502657 0.593154 -1.726688  
C -4.427547 -2.099544 0.005879  
C -3.730144 -2.859459 1.143844  
C -5.859965 -1.770706 0.475651  
C -4.512359 -3.038565 -1.222268  
H -5.091966 -3.946891 -1.004332  
H -4.993474 -2.535133 -2.069757  
H -3.502515 -3.329312 -1.529799  
H -6.398116 -2.693331 0.730755  
H -5.837428 -1.126024 1.360337  
H -6.438834 -1.254437 -0.297864  
H -4.282246 -3.774529 1.394898  
H -2.712270 -3.146690 0.856240  
H -3.663218 -2.230660 2.037706  
C 5.090383 0.459594 -0.291902  
N 4.386767 -0.430386 0.281512  
C 6.561260 0.503048 -0.156395  
C 7.256680 -0.439391 0.616727  
C 8.641461 -0.374995 0.726903  
C 9.357627 0.630366 0.068161  
C 7.286398 1.506171 -0.812340  
C 8.675675 1.571588 -0.702402  
H 6.682506 -1.211572 1.120098  
H 9.169742 -1.110507 1.328708  
H 10.440110 0.677598 0.156642  
H 6.753745 2.240564 -1.413506  
H 9.223989 2.356261 -1.217627  
H 4.659967 1.251007 -0.922242  
C 2.922999 -0.468562 0.143096  
C 2.357619 -0.365872 1.568968  
C 2.309519 0.626475 -0.735586  
C 2.586983 -1.850408 -0.440629  
H 1.501771 -1.990075 -0.487556  
H 2.994377 -1.949522 -1.453456  
H 3.021835 -2.639658 0.181264  
H 1.222349 0.505669 -0.771253  
H 2.515822 1.628881 -0.340499  
H 2.679786 0.575828 -1.767042  
H 1.268499 -0.480599 1.554730

H 2.790684 -1.144940 2.204809  
H 2.599167 0.608508 2.009247

59  
AN8\*

AI -0.084672 -0.777994 -1.572513  
H -0.767451 -2.065989 -2.210893  
H -3.285168 0.880759 -1.557833  
H 0.628268 0.286372 -2.555862  
C -2.442531 0.563152 -0.900304  
N -2.710391 -0.451341 0.006077  
C -1.858146 1.850442 -0.319271  
C -1.941612 2.101877 1.051701  
C -1.470106 3.302718 1.586300  
C -0.906940 4.272471 0.754944  
C -1.278548 2.822156 -1.145288  
C -0.811838 4.025791 -0.617860  
H -2.383661 1.318448 1.662341  
H -1.539077 3.481330 2.657994  
H -0.537738 5.207891 1.170529  
H -1.183595 2.623058 -2.211889  
H -0.365564 4.769204 -1.275499  
H -1.682157 3.037332 -1.788117  
C -3.939647 -1.191018 -0.226894  
C -4.012752 -2.284851 0.849078  
C -5.200140 -0.298958 -0.064436  
C -4.011493 -1.878081 -1.613861  
H -4.935016 -2.463685 -1.734922  
H -3.983075 -1.139141 -2.424907  
H -3.152568 -2.543880 -1.746898  
H -6.131506 -0.865073 -0.215676  
H -5.213858 0.136002 0.941594  
H -5.200633 0.527968 -0.785756  
H -4.946597 -2.860401 0.783057  
H -3.169639 -2.975803 0.745397  
H -3.948318 -1.827461 1.843081  
H 1.692120 0.691138 1.198200  
C 1.811775 0.299174 0.176439  
N 0.959808 -0.855256 -0.059929  
C 3.304668 0.132268 -0.094163  
C 3.780848 1.748364 -1.070396  
C 5.143600 -0.836069 -1.355270  
C 0.662297 -0.041178 -0.666833  
C 4.235585 0.926061 0.587933  
C 5.600342 0.843608 0.309173  
H 3.062193 -1.371101 -1.595839  
H 5.490529 -1.528789 -2.119252  
H 7.125191 -0.112051 -0.886083  
H 3.882772 1.617020 1.352578  
H 6.303857 1.466557 0.875785  
H 1.480835 1.117798 -0.478451  
C 0.788212 -1.770685 1.089625  
C 0.067201 -3.031761 0.602232  
C 2.141976 -2.197927 1.687679  
C -0.079141 -1.120084 2.185086  
H -0.223053 -1.810890 3.027240  
H 0.391195 -0.213102 2.583988  
H -1.054335 -0.855952 1.757199  
H 1.974697 -2.905729 2.509173  
H 2.770772 -2.684318 0.934201  
H 2.702099 -1.349308 2.094071  
H -0.065801 -3.735619 1.432742  
H -0.922580 -2.776459 0.211170  
H 0.639984 -3.530457 -0.188508

59  
AN9

AI 0.003180 -1.388897 -1.054118  
H 0.094387 -2.989001 -1.339013  
H -2.990601 0.326418 -2.134580  
H 0.485716 -0.473234 -2.319195  
C -2.180150 0.404300 -1.384529  
N -1.830949 -0.870748 -0.798320  
C -2.554324 1.538482 -0.430794  
C -2.058506 1.575557 0.876451  
C -2.351110 2.643797 1.724595  
C -3.150902 3.700197 1.282247  
C -3.353167 2.604227 -0.864198  
C -3.652169 3.675361 -0.020729  
H -1.446146 0.741059 1.208056  
H -1.952549 2.652221 2.737174  
H -3.382608 4.531205 1.944785  
H -3.751251 2.590193 -1.878674  
H -4.281190 4.488391 -0.378520  
H -1.311234 0.763755 -1.959916  
C -2.958301 -1.800816 -0.626749  
C -2.544365 -2.922851 0.335725  
C -4.207617 -1.125502 -0.022221  
C -3.353481 -2.445389 -1.977908



H -4.206166 -3.131471 -1.872534  
H -3.633395 -1.678201 -2.709877  
H -2.501607 -3.002772 -2.380856  
H -5.001150 -1.869511 0.126711  
H -3.973317 -0.671779 0.946245  
H -4.611571 -0.339779 -0.669220  
H -3.366998 -3.636249 0.476316  
H -1.680549 -3.467718 -0.056210  
H -2.279242 -2.504797 1.313278  
H 1.564702 1.055573 1.175576  
C 1.669387 0.512511 0.218473  
N 1.242873 -0.869125 0.303502  
C 3.081114 0.779327 -0.305294  
C 3.677231 -0.075838 -1.238172  
C 4.939091 0.204929 -1.761848  
C 5.634411 1.348430 -1.360541  
C 3.784361 1.925236 0.085262  
C 5.049428 2.210797 -0.431690  
H 3.127185 -0.963681 -1.537595  
H 5.382794 -0.471848 -2.489473  
H 6.620738 1.564133 -1.765615  
H 3.334029 2.601754 0.811413  
H 5.580274 3.103291 -0.105605  
H 1.000987 1.043964 -0.476285  
C 1.551482 -1.535759 1.574639  
C 1.323789 -3.045496 1.426646  
C 3.020969 -1.339995 2.007564  
C 0.640696 -1.026503 2.719029  
H 0.873987 -1.518769 3.673524  
H 0.757119 0.053300 2.869251  
H -0.408400 -1.222158 2.475119  
H 3.218263 -1.889818 2.937345  
H 3.702745 -1.708839 1.234646  
H 3.262644 -0.287647 2.189163  
H 1.562738 -3.559732 2.366656  
H 0.285161 -3.270799 1.170635  
H 1.952478 -3.452696 0.628787

61

AN10  
Al -0.001437 -1.406075 0.966060  
H -0.095123 -0.3101024 1.216721  
H 2.983678 0.287190 2.102688  
H -0.490873 -0.521357 2.252197  
C 2.177832 0.381437 1.349678  
N 1.832548 -0.880791 0.734010  
C 2.557467 1.536340 0.423301  
C 2.074434 1.599647 -0.887634  
C 2.372035 2.686518 -1.710049  
C 3.163991 3.735633 -1.237468  
C 3.348657 2.594981 0.887148  
C 3.652523 3.684610 0.069603  
H 1.467954 0.770682 -1.242982  
H 1.983457 2.715223 -2.726123  
H 3.399504 4.581271 -1.879826  
H 3.736637 2.560607 1.905031  
H 4.275271 4.491794 0.450788  
H 1.305620 0.728579 1.927550  
C 2.961197 -1.806949 0.548570  
C 2.552950 -2.907251 -0.441082  
C 4.213893 -1.118403 -0.033408  
C 3.348254 -2.481060 1.887472  
H 4.201858 -3.164338 1.772182  
H 3.623305 -1.730224 2.637979  
H 2.494314 -3.047573 2.272893  
H 5.008339 -1.859005 -0.193761  
H 3.985570 -0.643528 -0.993093  
H 4.613856 -0.347188 0.633206  
H 3.376167 -3.617787 -0.592164  
H 1.686558 -3.460444 -0.066864  
H 2.294262 -2.467664 -1.410892  
H -1.548473 1.091013 -1.212234  
C -1.659063 0.527017 -0.268044  
N -1.235432 -0.853434 -0.382078  
C -3.072631 0.785363 0.254983  
C -3.677930 -0.092298 1.160538  
C -4.941561 0.179711 1.684588  
C -5.629382 1.336951 1.310859  
C -3.768535 1.944684 -0.108189  
C -5.035256 2.221719 0.409257  
H -3.133803 -0.990767 1.438299  
H -5.392342 -0.514649 2.390940  
H -6.616974 1.546088 1.716251  
H -3.311001 2.638798 -0.812901  
H -5.560214 3.125263 0.104845  
H -0.992599 1.041401 0.441295  
C -1.539071 -1.490915 -1.669380  
C -1.315921 -3.004137 -1.553510  
C -3.005675 -1.281571 -2.105496

C -0.620861 -0.958771 -2.797212  
H -0.850463 -1.428896 -3.763658  
H -0.733514 0.124446 -2.923807  
H 0.426340 -1.162912 -2.552201  
H -3.199188 -1.809758 -3.048492  
H -3.692668 -1.665989 -1.344913  
H -3.243711 -0.224771 -2.264667  
H -1.550700 -3.496859 -2.505966  
H -0.279343 -3.237772 -1.296535  
H -1.950252 -3.427283 -0.768499  
H -0.638329 -0.914404 4.762457  
H -0.688320 -0.979137 5.504801

61

AN11\*  
Al 0.109791 -0.722734 -1.054525  
H -0.177095 -2.200306 -1.719159  
H -3.321123 -1.432549 -1.134617  
H -0.199217 0.393034 -2.186527  
C -2.799011 -0.489064 -0.937886  
N -1.713987 -0.707658 0.030912  
C -3.812713 0.590598 -0.608133  
C -3.413970 1.815732 -0.055641  
C -4.350853 2.822015 0.178895  
C -5.697991 2.629710 -0.136557  
C -5.164726 0.408393 -0.924660  
C -6.102759 1.416105 -0.692865  
H -2.360114 1.968836 0.187462  
H -4.022792 3.765739 0.608744  
H -6.424483 3.417483 0.049250  
H -5.489368 -0.537555 -1.355666  
H -7.148649 1.250028 -0.942208  
H -2.320659 -0.206282 -1.887408  
C -1.991751 -1.645618 1.152064  
C -0.773244 -1.610154 2.085175  
C -3.234120 -1.223806 1.954646  
C -2.180320 -3.078621 0.630718  
H -2.260068 -3.774200 1.475305  
H -3.094449 -3.183228 0.035186  
H -1.333627 -3.369528 0.003082  
H -3.374473 -1.902190 2.805667  
H -3.122563 -0.205100 2.339361  
H -4.144864 -1.256257 1.348492  
H -0.929815 -2.294884 2.927134  
H 0.136504 -1.911543 1.556148  
H -0.611278 -0.600441 2.474029  
H -1.259429 0.252452 0.397956  
H -0.328696 1.139493 0.486153  
H 2.633034 -0.575324 1.655701  
C 2.236446 0.011858 0.805434  
N 1.855574 -0.814806 -0.322204  
C 3.194858 1.159986 0.531043  
C 3.082962 1.908999 -0.647952  
C 3.904742 3.012299 -0.874387  
C 4.859815 3.392663 0.072722  
C 4.148445 1.556343 1.476326  
C 4.976391 2.658597 1.254253  
H 2.337481 1.606833 -1.378789  
H 3.796715 3.583283 -1.794567  
H 5.503626 4.250897 -0.107605  
H 4.247581 0.985753 2.399528  
H 5.716868 2.940280 2.000859  
H 1.310653 0.499907 1.158943  
C 2.797456 -1.897679 -0.690903  
C 2.761201 -2.122229 -2.124268  
C 4.264592 -1.581678 -0.335738  
C 2.410779 -3.212585 0.022896  
H 3.101812 -4.032637 -0.220571  
H 2.425973 -3.071306 1.110937  
H 1.400051 -3.510768 -0.273183  
H 4.900302 -2.409707 -0.674173  
H 4.606227 -0.666139 -0.827141  
H 4.422925 -1.466019 0.741169  
H 3.438570 -2.938353 -2.501911  
H 1.752216 -2.378321 -2.548175  
H 3.076470 -1.209765 -2.732617

61

AN12  
Al 1.288240 -2.043397 -1.179219  
H 1.339858 -3.674459 -0.994900  
H -4.736120 -0.795805 -1.493379  
H 1.348304 -1.661961 -2.771525  
C -3.656135 -0.642707 -1.372062  
N -3.097711 -1.763414 -0.637064  
C -3.424876 0.779112 -0.870370  
C -2.126668 1.050623 -0.630071  
C -1.911851 2.560624 -0.205915  
C -2.992678 3.427035 -0.018245

C -4.497704 1.657455 -0.684090  
C -4.288572 2.972369 -0.259993  
H -1.279625 0.579472 -0.763159  
H -0.896752 2.903836 -0.024119  
H -2.822911 4.448349 0.314279  
H -5.512238 1.307015 -0.870451  
H -5.137539 3.637583 -0.116455  
H -3.231381 -0.708187 -2.382935  
C -3.568704 -2.104681 0.711643  
C -2.927240 -3.461595 1.039629  
C -3.162833 -1.090512 1.802417  
C -5.094751 -2.261366 0.703365  
H -5.435348 -2.665206 1.663566  
H -5.604304 -1.302833 0.553410  
H -5.404775 -2.948676 -0.091874  
H -3.467811 -1.447781 2.794940  
H -2.076544 -0.953676 1.807550  
H -3.624689 -0.112987 1.637851  
H -3.209453 -3.794564 2.045693  
H -3.243195 -4.216577 0.312525  
H -1.835068 -3.391168 0.995657  
H -2.076726 -1.747035 -0.662288  
H -0.110865 -1.449445 -0.533198  
H 2.758369 -0.474462 1.837752  
C 2.261320 -0.260451 0.872638  
N 2.654522 -1.166381 -0.176643  
C 2.433756 1.234446 0.594130  
C 2.435301 1.724689 -0.716047  
C 2.526926 3.094188 -0.967878  
C 2.623169 4.003342 0.088422  
C 2.527832 2.155125 1.645427  
C 2.623887 3.525986 1.400889  
H 2.371710 1.002986 -1.527197  
H 2.521918 3.454239 -1.994751  
H 2.699002 5.070535 -0.108160  
H 2.529996 1.789835 2.672307  
H 2.703885 4.221802 2.234027  
H 1.186918 -0.401817 1.070391  
C 4.031818 -1.668385 -0.107230  
C 4.368824 -2.345434 -1.444066  
C 5.066976 -0.546908 0.119491  
C 4.184385 -2.719681 1.019077  
H 5.209667 -3.111827 1.077051  
H 3.940613 -2.287123 1.997129  
H 3.497724 -3.552772 0.836586  
H 6.083247 -0.962742 0.128868  
H 5.005821 0.201295 -0.677533  
H 4.913511 -0.030865 1.073522  
H 5.390255 -2.747249 -1.428545  
H 3.682694 -3.175937 -1.646361  
H 4.283962 -1.628699 -2.267455

86

AN13  
Al -1.268692 -0.379316 0.565705  
H -0.149146 -0.762017 1.689512  
H -2.353063 -3.020261 -1.660482  
H -0.584184 -0.002027 -0.870286  
C -2.687896 -2.052949 -1.239934  
N -2.355873 -1.905867 0.160476  
C -4.151032 -1.868144 -1.641635  
C -5.014551 -1.070263 -0.884461  
C -6.332152 -0.854856 -1.289318  
C -6.815775 -1.436940 -2.463223  
C -4.646428 -2.445337 -2.817784  
C -5.963785 -2.235917 -3.228314  
H -4.626522 -0.632180 0.031348  
H -6.985561 -0.228811 -0.684968  
H -7.844114 -1.272302 -2.777011  
H -3.988660 -3.073477 -3.418219  
H -6.327426 -2.700887 -4.142679  
H -2.118474 -1.297807 -1.806085  
C -2.411653 -3.151347 0.942598  
C -2.408806 -2.808317 2.438534  
C -3.687928 -3.974660 0.668691  
C -1.806630 -4.043385 0.650983  
H -1.215402 -4.987477 1.212814  
H -1.121172 -4.294108 -0.414845  
H -0.265779 -3.507660 0.923721  
H -3.702403 -4.868047 1.306493  
H -4.584461 -3.383572 0.881457  
H -3.750757 -4.312258 -0.371068  
H -2.439295 -3.722220 3.045760  
H -1.506565 -2.250094 2.705626  
H -3.283528 -2.198457 2.690235  
H -3.770001 2.207290 -0.009461  
C -2.699284 1.956511 -0.118922  
N -2.169368 1.237498 1.022243  
C -1.973377 3.233082 -0.544477

C -0.599362 3.387646 -0.334850  
C 0.069400 4.527049 -0.782104  
C -0.624902 5.539369 -1.448971  
C -2.658209 4.251628 -1.218267  
C -1.996385 5.396149 -1.666292  
H -0.073927 2.595198 0.190594  
H 1.139346 4.626098 -0.610259  
H -0.103903 6.429983 -1.793339  
H -3.729367 4.147062 -1.389512  
H -2.552104 6.178152 -2.180215  
H -2.658948 1.296808 -0.999384  
C -2.705398 1.657351 2.323788  
C -1.862965 1.035290 3.444532  
C -2.659935 3.188324 2.518898  
C -4.170073 1.191836 2.512605  
H -4.573674 1.507820 3.484519  
H -4.822736 1.607243 1.735802  
H -4.226375 0.100282 2.452154  
H -3.030496 3.453421 3.517801  
H -1.635288 3.560148 2.419148  
H -3.278355 3.717624 1.786674  
H -2.244543 1.347383 4.425162  
H -1.884998 -0.057033 3.404416  
H -0.817121 1.345446 3.356705  
C 5.846356 -0.423128 -0.553857  
N 5.225807 -0.581478 0.544489  
C 7.321421 -0.450050 -0.632261  
C 8.115349 -0.653204 0.506888  
C 9.501942 -0.673621 0.403806  
C 10.120898 -0.491841 -0.838394  
C 7.949524 -0.268891 -1.871172  
C 9.340474 -0.289244 -1.976153  
H 7.616025 -0.792143 1.461151  
H 10.107568 -0.831635 1.292101  
H 11.205094 -0.508287 -0.915669  
H 7.339941 -0.110474 -2.758662  
H 9.813199 -0.146907 -2.944598  
H 5.334769 -0.256628 -1.512495  
C 3.757293 -0.553426 0.611867  
C 3.396251 0.567547 1.599840  
C 3.031420 -0.323119 -0.717304  
C 3.331049 -1.904892 1.207238  
H 2.251308 -1.906454 1.386641  
H 3.575257 -2.724150 0.521667  
H 3.850967 -2.083859 2.153950  
H 1.949413 -0.316044 -0.553523  
C 3.299247 0.640557 -1.167078  
H 3.248809 -1.116695 -1.442601  
H 2.316758 0.569425 1.780120  
H 3.916633 0.417631 2.551306  
H 3.687937 1.545106 1.199824

86

AN14\*

Al 0.182494 -0.783708 0.369626  
H 0.539175 -1.984310 1.344099  
H -2.275485 -2.215952 -1.487208  
C -2.303715 -1.563101 -0.588167  
N -2.337107 -2.168752 0.640791  
C -3.340910 -0.474391 -0.853572  
C -4.258916 -0.126274 0.138423  
C -5.231663 0.845935 -0.103256  
C -5.309350 1.472701 -1.348511  
C -3.424129 0.158330 -2.100021  
C -4.401675 1.120885 -2.351591  
H -4.175831 -0.655941 1.083967  
H -5.936173 1.112855 0.682336  
H -6.071867 2.224820 -1.539647  
H -2.717415 -0.111939 -2.883993  
H -4.458196 1.595310 -3.329230  
H -1.267451 -0.919993 -0.848877  
C -2.290142 -3.624788 0.660974  
C -2.144278 -0.031986 2.134315  
C -3.610234 -4.228213 0.117472  
C -1.117272 -4.257901 -0.127604  
H -1.130908 -5.354148 -0.050513  
H -1.165353 -4.009394 -1.195076  
H -0.161222 -3.896003 0.262302  
H -3.621141 -5.327339 0.173747  
H -4.457242 -3.838053 0.693002  
H -3.762969 -3.947176 -0.932472  
H -2.152504 -5.123546 2.260063  
H -1.205808 -3.635390 2.535510  
H -2.967323 -3.602898 2.717209  
H -1.915582 2.109166 0.864185  
C -0.936437 1.856833 0.426882  
N -0.248554 0.835264 1.196374  
C -0.193573 3.165386 0.166315  
C 1.197046 3.261088 0.262592

C 1.858394 4.453798 -0.033526  
C 1.136719 5.579164 -0.434519  
C -0.907652 4.300994 -0.238819  
C -0.253838 5.496557 -0.536226  
H 1.745223 2.379296 0.582872  
H 2.942171 4.503629 0.047837  
H 1.650318 6.509954 -0.663648  
H -1.992347 4.243766 -0.319567  
H -0.830291 6.366258 -0.844747  
H -1.196442 1.454076 -0.561048  
C -0.472048 0.929867 2.667144  
C 0.574259 0.084392 3.409543  
C -0.314424 2.374275 3.183935  
C -1.877202 0.419492 3.043140  
H -2.016007 0.143653 4.133037  
H -2.655783 1.063850 2.617524  
H -2.031336 -0.590169 2.644748  
H -0.485334 2.388480 4.267367  
H 0.691396 2.760452 2.990655  
H -1.032693 3.065482 2.732391  
H 0.467845 0.227529 4.491942  
H 0.462177 -0.979741 3.193995  
H 1.588262 0.385260 3.121210  
H 2.650949 -2.663926 -1.493462  
C 2.492556 -1.967079 -0.653798  
N 1.510568 -0.942402 -0.968422  
C 3.863815 -1.501108 -0.172428  
C 4.026413 -0.298099 0.521328  
C 5.273275 0.081351 1.018929  
C 6.388259 -0.737272 0.829842  
C 4.989492 -2.314796 -0.354219  
C 6.240167 -1.941191 1.038610  
H 3.156579 0.339255 0.654658  
H 5.374559 1.021114 1.557493  
H 7.361102 -0.440110 1.214269  
H 4.882856 -3.254874 -0.894569  
H 7.100524 -2.587910 -0.020864  
H 2.089278 -2.586505 0.162149  
C 1.527477 -0.503225 -2.376453  
C 0.657532 0.745084 -2.536383  
C 2.945729 -0.134000 -2.857953  
C 0.961525 -1.601883 -3.305661  
H 0.970343 -1.278553 -4.354986  
H 1.545670 -2.526674 -3.242531  
H -0.069616 -1.836346 -3.022528  
H 2.906866 0.226970 -3.893424  
H 3.373702 0.655867 -2.233015  
H 3.629061 -0.988607 -2.831652  
H 0.672656 1.092887 -3.576284  
H -0.384103 0.532333 -2.276449  
H 1.017736 1.557716 -1.899522

86

AN15

Al -0.602175 -0.343340 0.761998  
H -1.653569 -0.736635 1.953637  
H -0.344352 3.221637 0.725653  
C 0.245049 2.373542 0.329035  
N 0.323621 1.266652 1.262433  
C 1.540170 2.960775 -0.226916  
C 2.651922 2.161340 -0.514561  
C 3.799061 2.702675 -1.094775  
C 3.861263 4.063832 -1.400965  
C 1.615422 4.323731 -0.543599  
C 2.759645 4.874566 -1.122503  
H 2.610839 1.104295 -0.272969  
H 4.646022 2.055076 -1.309424  
H 4.757143 4.487196 -1.849384  
H 0.761801 4.964676 -0.324606  
H 2.793025 5.938191 -1.350577  
H -0.326203 2.020446 -0.542757  
C 0.448528 1.677318 2.678742  
C 0.806386 0.455771 3.538332  
C 1.559309 2.725000 2.892157  
C -0.881961 2.256679 3.216669  
H -0.778763 2.601814 4.254642  
H -1.215859 3.112783 2.618746  
H -1.660934 1.488255 3.181981  
H 1.672678 2.938613 3.963070  
H 2.517137 2.358176 2.508897  
H 1.339734 3.672004 2.388642  
H 0.809884 0.730067 4.600914  
H 0.077963 -0.349164 3.400979  
H 1.800087 0.075306 3.283570  
H 2.294476 -1.950356 1.922318  
C 2.023344 -1.500331 0.974909  
N 0.654509 -1.786183 0.564639  
C 3.160148 -1.843201 -0.013659  
C 2.999191 -1.834327 -1.402983

C 4.077002 -2.075884 -2.255526  
C 5.347396 -2.331568 -1.736009  
C 4.441573 -2.100165 0.499387  
C 5.524862 -2.341889 -0.351186  
H 2.010414 -1.642738 -1.804778  
H 3.923197 -0.062330 -3.332574  
H 6.187026 -2.522239 -2.400449  
H 4.588297 -2.115375 1.573533  
H 6.507101 -2.543862 0.071489  
H 2.088565 -0.415067 1.116381  
C 0.222902 -3.174032 0.852123  
C -1.122159 -3.425068 0.159347  
C 1.211497 -4.229092 0.317335  
C 0.036777 -3.415395 2.369478  
H -0.260175 -4.453140 2.573933  
H 0.966213 -3.226983 2.919442  
H -0.734613 -2.745592 2.761176  
H 0.810253 -5.235850 0.492198  
H 1.374446 -4.104801 -0.757903  
H 2.186757 -4.172930 0.811471  
H -1.506677 -4.420723 0.414074  
H -1.869820 -2.686004 0.463352  
H -1.010134 -3.368455 -0.928025  
H -2.845462 1.962441 -0.675998  
C -2.830492 0.974763 -0.181453  
N -1.767825 0.116889 -0.680662  
C -4.260104 0.441511 -0.192481  
C -4.570332 -0.782578 0.416282  
C -5.881098 -1.252241 0.452237  
C -6.915609 -0.508461 -0.124580  
C -5.305813 1.181561 -0.754563  
C -6.622802 0.713976 -0.727739  
H -3.761727 -1.352102 0.866060  
H -6.099925 -2.203037 0.933770  
H -7.937908 -0.879171 -0.101762  
H -5.083401 2.138289 -1.225428  
H -7.417227 1.303676 -1.180806  
H -2.601687 1.193196 0.872383  
C -1.728320 -0.086529 -2.135790  
C -0.327747 -0.575456 -2.516198  
C -2.750174 -1.147056 -2.612614  
C -1.993601 1.209248 -2.935109  
H -1.825269 1.027080 -4.003573  
H -3.024950 1.561844 -2.825975  
H -1.318150 2.012945 -2.620095  
H -2.656605 -1.323877 -3.693453  
H -2.583337 -0.094165 -0.291703  
H -3.777405 -0.831032 -2.411741  
H -0.273500 -0.812793 -3.586032  
H 0.423296 0.192071 -2.295789  
H -0.069967 -1.467829 -1.939899

88

AN16

Al -0.567250 -0.351675 0.727765  
H -1.641256 -0.737720 1.901550  
H -0.379813 3.216170 0.608389  
C 0.236226 2.370685 0.248389  
N 0.312246 1.288984 1.211072  
C 1.533542 2.970255 -0.289020  
C 2.667216 2.186314 -0.529924  
C 3.818112 2.736397 -1.094236  
C 3.862064 4.091028 -1.431040  
C 1.590755 4.326675 -0.636032  
C 2.738542 4.886248 -1.199303  
H 2.640113 1.134566 -0.264457  
H 4.682391 2.100726 -1.272402  
H 4.760751 4.521358 -1.867034  
H 0.719833 4.955657 -0.453526  
H 2.757418 5.944727 -1.451672  
H -0.305125 1.984596 -0.628491  
C 0.392628 1.736700 2.619306  
C 0.751000 0.543755 3.517949  
C 1.477621 2.810686 2.834509  
C -0.962044 2.303036 3.108476  
H -0.892486 2.675426 4.139785  
H -1.296342 3.173555 2.481018  
H -1.725228 1.518969 3.073169  
H 1.559312 3.052659 3.902265  
H 2.451747 2.453233 2.484922  
H 1.253307 3.740586 2.302058  
H 0.723179 0.844327 4.573037  
H 0.040777 -0.277761 3.383212  
H 1.757437 0.175765 3.297088  
H 2.330172 -1.869233 2.000455  
C 2.075328 -1.448992 1.008483  
N 0.722888 -1.772512 0.597785  
C 3.243219 -1.791793 0.084865  
C 3.117814 -1.820788 -1.307824

|   |           |           |           |   |           |           |           |   |           |           |           |
|---|-----------|-----------|-----------|---|-----------|-----------|-----------|---|-----------|-----------|-----------|
| C | 4.221853  | -2.060708 | -2.126621 | C | 2.896551  | -0.361960 | 0.730517  | H | -1.020136 | -0.275334 | -0.571304 |
| C | 5.483422  | -2.276673 | -1.569004 | N | 1.710183  | -1.191075 | 0.736772  | H | -0.546530 | 2.927884  | 0.876584  |
| C | 4.516159  | -2.009076 | 0.630946  | C | 4.012796  | -0.656305 | -0.272422 | C | 0.172952  | 2.340375  | 0.273419  |
| C | 5.625468  | -2.248888 | -0.180325 | C | 3.777189  | -1.312552 | -1.483356 | N | 0.751720  | 1.237705  | 1.006225  |
| H | 2.135960  | -1.660093 | -1.739056 | C | 4.800530  | -1.495346 | -2.414045 | C | 1.130178  | 3.339216  | -0.379050 |
| H | 4.095484  | -2.077111 | -3.207191 | C | 6.088193  | -1.023419 | -2.152194 | C | 2.454980  | 2.999794  | -0.666502 |
| H | 6.343560  | -2.466049 | -2.207057 | C | 5.309609  | -0.188385 | -0.020756 | C | 3.303269  | 3.898738  | -1.313694 |
| H | 4.635379  | -1.994308 | 1.713878  | C | 6.338747  | -0.366635 | -0.945676 | C | 2.840887  | 5.162472  | -1.686300 |
| H | 6.600455  | -2.419581 | 0.271888  | H | 2.776597  | -1.686378 | -1.673002 | C | 0.677234  | 4.609306  | -0.758017 |
| H | 2.114376  | -0.358786 | 1.151168  | H | 4.590713  | -2.009695 | -3.349725 | C | 1.519358  | 5.514882  | -1.404193 |
| C | 0.311917  | -3.161545 | 0.908911  | H | 6.886611  | -1.167698 | -2.876532 | H | 2.798803  | 2.015346  | -0.359963 |
| C | -1.008043 | -3.457815 | 0.186422  | H | 5.514731  | 0.321343  | 0.920456  | H | 4.330387  | 3.611196  | -1.528923 |
| C | 1.336186  | -4.208648 | 0.428491  | H | 7.337959  | 0.002514  | -0.722703 | H | 3.502014  | 5.865320  | -2.188096 |
| C | 0.088904  | -3.368639 | 2.426360  | H | 2.590006  | 0.665751  | 0.494818  | H | -0.351795 | 4.893197  | -0.538534 |
| H | -0.192110 | -4.407019 | 2.649307  | C | 1.860490  | -2.445117 | 1.520411  | H | 1.145690  | 6.497836  | -1.684265 |
| H | 0.998768  | -3.146692 | 2.996198  | C | 0.728670  | -3.409426 | 1.142519  | H | -0.436225 | 1.927187  | -0.546665 |
| H | -0.706629 | -2.705795 | 2.779761  | C | 3.185318  | -3.181665 | 1.233933  | C | 1.007723  | 1.501061  | 2.436561  |
| H | 0.951041  | -5.218872 | 0.618828  | C | 1.787831  | -2.186878 | 3.043728  | C | 1.983268  | 0.443946  | 2.973474  |
| H | 1.525981  | -4.108628 | -0.644878 | H | 1.919708  | -3.117667 | 3.612389  | C | 1.650996  | 2.880131  | 2.689543  |
| H | 2.296138  | -4.119064 | 0.947056  | H | 2.574655  | -1.493596 | 3.365434  | C | -0.303270 | 1.420629  | 3.254273  |
| H | -1.379979 | -4.454177 | 0.456594  | H | 0.815522  | -1.756846 | 3.301670  | H | -0.134394 | 1.633240  | 4.319223  |
| H | -1.778154 | -2.726439 | 0.450298  | H | 3.211513  | -4.115014 | 1.810838  | H | -1.039746 | 2.144771  | 2.885141  |
| H | -0.866787 | -3.426813 | -0.898576 | H | 3.280075  | -3.432861 | 0.173448  | H | -0.735106 | 0.418995  | 3.162619  |
| H | -2.820230 | 1.870626  | -0.823518 | H | 4.064454  | -2.595067 | 1.519286  | H | 1.845327  | 3.006016  | 3.762273  |
| C | -2.796999 | 0.895897  | -0.304245 | H | 0.830940  | -4.355584 | 1.689673  | H | 2.601516  | 2.974947  | 2.155691  |
| N | -1.704238 | 0.049319  | -0.755083 | H | -0.242461 | -2.974917 | 1.391745  | H | 1.006202  | 3.707249  | 2.373987  |
| C | -4.214312 | 0.331531  | -0.337553 | H | 0.753858  | -3.622458 | 0.068280  | H | 2.175011  | 0.603607  | 4.042435  |
| C | -4.513509 | -0.884694 | 0.292204  | H | -3.281839 | -0.002538 | -0.875604 | H | 1.576091  | -0.563707 | 2.848812  |
| C | -5.814516 | -1.381900 | 0.307345  | C | -2.690106 | -0.733262 | -0.291613 | H | 2.937507  | 0.497011  | -2.439766 |
| C | -6.849941 | -0.674384 | -0.311944 | N | -1.325725 | -0.854727 | -0.770349 | H | 2.170695  | -3.463603 | -0.589709 |
| C | -5.261233 | 1.035407  | -0.942296 | C | -3.546527 | -1.992364 | -0.162259 | C | 2.318322  | -2.508005 | -0.051862 |
| C | -6.568250 | 0.539853  | -0.936591 | C | -2.983342 | -3.247506 | 0.083853  | N | 1.665021  | -1.393909 | -0.702224 |
| H | -3.704314 | -1.425920 | 0.774680  | C | -3.787876 | -4.370697 | 0.275988  | C | 3.814678  | -2.381730 | 0.236867  |
| H | -6.024991 | -2.325872 | 0.805723  | C | -5.179218 | -4.261788 | 0.225468  | C | 4.437014  | -1.134080 | 0.334171  |
| H | -7.864398 | -1.066612 | -0.305178 | C | -4.943156 | -1.895467 | -0.211040 | C | 5.790265  | -1.028745 | 0.656765  |
| H | -5.047596 | 1.985614  | -1.430115 | C | -5.755355 | -3.014115 | -0.020254 | C | 6.552661  | -2.175568 | 0.887980  |
| H | -7.363532 | 1.101459  | -1.422618 | H | -1.901320 | -3.244448 | 0.108537  | C | 4.589486  | -3.525109 | 0.471051  |
| H | -2.599740 | 1.144979  | 0.749186  | H | -3.325511 | -5.337046 | 0.466619  | C | 5.943729  | -3.428731 | 0.793066  |
| C | -1.622610 | -0.187854 | -2.203339 | H | -5.806486 | -5.138099 | 0.372411  | H | 3.829881  | -0.253404 | 0.141851  |
| C | -0.202302 | -0.654348 | -2.535803 | H | -5.400262 | -0.925766 | -0.406904 | H | 6.252491  | -0.046268 | 0.728666  |
| C | -2.608575 | -1.281876 | -2.679983 | H | -6.837818 | -2.912962 | -0.069056 | H | 7.608490  | -2.094704 | 1.136254  |
| C | -1.895234 | 1.082234  | -3.040527 | H | -2.649241 | -0.320960 | 0.728506  | H | 4.122542  | -4.506887 | 0.394786  |
| H | -1.694962 | 0.878453  | -4.099524 | C | -1.182230 | -0.885508 | -2.239382 | H | 6.525898  | -4.332021 | 0.965018  |
| H | -2.936609 | 1.413862  | -2.966525 | C | 0.244845  | -1.319827 | -2.582089 | H | 1.833708  | -2.666200 | 0.924910  |
| H | -1.246120 | 1.908293  | -2.728049 | C | -2.142718 | -1.889342 | -2.910048 | C | 1.657804  | -1.447274 | -2.176176 |
| H | -2.484254 | -1.481152 | -3.753789 | C | -1.423167 | 0.500459  | -2.882883 | C | 1.255498  | -0.071189 | -2.723705 |
| H | -2.433966 | -2.212893 | -2.133280 | H | -1.347136 | 0.446590  | -3.977239 | C | 3.040983  | -1.787311 | -2.768774 |
| H | -3.647196 | -0.984589 | -2.511650 | H | -2.422340 | 0.886375  | -2.646641 | C | 0.638043  | -2.491767 | -2.688480 |
| H | -0.115058 | -0.916201 | -3.597707 | H | -0.680309 | 1.219192  | -2.524324 | H | 0.628695  | -2.545087 | -3.786045 |
| H | 0.525998  | 0.134786  | -2.315292 | H | -1.954607 | -1.913095 | -3.991174 | H | 0.876230  | -3.494016 | -2.312500 |
| H | 0.059584  | -1.526575 | -1.931185 | H | -1.996586 | -2.898400 | -2.512928 | H | -0.367506 | -2.232391 | -2.343383 |
| H | -6.500081 | 1.957089  | 3.541377  | H | -3.194602 | -1.622260 | -2.764634 | H | 2.987875  | -1.786241 | -3.865081 |
| H | -6.876675 | 2.305243  | 4.080255  | H | 0.386907  | -1.357250 | -3.669734 | H | 3.790513  | -1.051868 | -2.460163 |
|   |           |           |           | H | 0.966732  | -0.613986 | -2.163695 | H | 3.395178  | -2.775864 | -2.457767 |
|   |           |           |           | H | 0.451246  | -2.311487 | -2.165788 | H | 1.237024  | -0.082701 | -3.820901 |
|   |           |           |           |   |           |           |           | H | 0.258068  | 0.211916  | -2.373559 |
|   |           |           |           |   |           |           |           | H | 1.965311  | 0.695879  | -2.398802 |

88

AN17\*

|    |           |           |           |
|----|-----------|-----------|-----------|
| AI | -0.040592 | -0.379448 | 0.567974  |
| H  | -0.842369 | -0.931137 | 1.883281  |
| H  | -2.324436 | 2.331050  | 0.967694  |
| C  | -1.409105 | 2.320050  | 0.357265  |
| N  | -0.283652 | 1.734850  | 1.079865  |
| C  | -1.229395 | 3.700220  | -0.261783 |
| C  | -0.047256 | 4.053416  | -0.925216 |
| C  | 0.079158  | 5.291960  | -1.552944 |
| C  | -0.976292 | 6.206852  | -1.533270 |
| C  | -2.282151 | 4.623368  | -0.255991 |
| C  | -2.161732 | 5.865443  | -0.881999 |
| H  | 0.774111  | 3.340983  | -0.948521 |
| H  | 1.006182  | 5.542916  | -2.063693 |
| H  | -0.875455 | 7.173599  | -2.020834 |
| H  | -3.209688 | 4.365815  | 0.253406  |
| H  | -2.992637 | 6.567317  | -0.856661 |
| H  | -1.622719 | 1.640239  | -0.477503 |
| C  | -0.063367 | 2.234353  | 2.457874  |
| C  | 1.252826  | 1.637568  | 2.965896  |
| C  | 0.057904  | 3.767787  | 2.538378  |
| C  | -1.203142 | 1.779283  | 3.391685  |
| H  | -1.001724 | 2.088487  | 4.425640  |
| H  | -2.162426 | 2.223470  | 3.101132  |
| H  | -1.303346 | 0.690942  | 3.354856  |
| H  | 0.305574  | 4.063184  | 3.566286  |
| H  | 0.846823  | 4.136619  | 1.874886  |
| H  | -0.872848 | 4.273043  | 2.264138  |
| H  | 1.423880  | 1.924278  | 4.010366  |
| H  | 1.236327  | 0.546184  | 2.909112  |
| H  | 2.097252  | 2.000834  | 2.370804  |
| H  | 0.604773  | 1.487030  | 0.137933  |
| H  | 0.961189  | 0.948219  | -0.631446 |
| H  | 3.374753  | -0.298458 | 1.727253  |

88

AN18

|    |           |           |           |
|----|-----------|-----------|-----------|
| AI | 0.338510  | -0.502767 | 0.334968  |
| H  | 0.021640  | -1.523128 | 1.570139  |
| H  | -5.281340 | -1.792066 | -1.820998 |
| C  | -4.445229 | -1.191177 | -1.441561 |
| N  | -3.540827 | -2.050394 | -0.700939 |
| C  | -5.014931 | 0.057172  | -0.774849 |
| C  | -4.164544 | 1.013695  | -0.203226 |
| C  | -4.683163 | 2.170126  | 0.375620  |
| C  | -6.062327 | 2.396316  | 0.391517  |
| C  | -6.392933 | 0.297102  | -0.758462 |
| C  | -6.917943 | 1.455465  | -0.179989 |
| H  | -3.089298 | 0.841263  | -0.206954 |
| H  | -4.007086 | 2.898322  | 0.816515  |
| H  | -6.464252 | 3.298453  | 0.846317  |
| H  | -7.066272 | -0.435401 | -1.201695 |
| H  | -7.993368 | 1.619216  | -0.173392 |
| H  | -3.887220 | -0.863985 | -2.329303 |
| C  | -3.993162 | -2.816754 | 0.468554  |
| C  | -2.839379 | -3.770240 | 0.812595  |
| C  | -4.307241 | -1.955862 | 1.710414  |
| C  | -5.231150 | -3.641719 | 0.093285  |
| H  | -5.483392 | -4.329386 | 0.908205  |
| H  | -6.108767 | -3.009252 | -0.082594 |
| H  | -5.039331 | -4.230746 | -0.810640 |
| H  | -4.566066 | -2.593909 | 2.565439  |
| H  | -3.434458 | -1.356453 | 1.988896  |
| H  | -5.144408 | -1.275316 | 1.530804  |
| H  | -3.091587 | -4.386162 | 1.684034  |
| H  | -2.624022 | -4.427367 | -0.036294 |
| H  | -1.928859 | -3.207945 | 1.048624  |
| H  | -2.657987 | -1.576266 | -0.511358 |

## References

- [S1] S.-N. Trzaska, Alkalimetallbortetrahydride und -Aluminiumtetrahydride, Universität Hamburg, **2008**.
- [S2] N. Momiyama, H. Nishimoto, M. Terada, *Org. Lett.* **2011**, *13*, 2126–2129.
- [S3] X. Cattoën, S. Solé, C. Pradel, H. Gornitzka, K. Miqueu, D. Bourissou, G. Bertrand, *J. Org. Chem.* **2003**, *68*, 911–914.
- [S4] Rigaku Oxford Diffraction, **2018**, CrysAlisPro Software system, version 1.171.39.46, Rigaku Corporation, Oxford, UK.
- [S5] O. V. Dolomanov, L. J. Bourhis, R.J. Gildea, J. A. K. Howard and H. Puschmann, *J. Appl. Cryst.*, **2009**, *42*, 339–341.
- [S6] G. M. Sheldrick, *Acta Cryst. A*, **2015**, *71*, 3–8.
- [S7] G. M. Sheldrick, *Acta Cryst.* **2008**, *A64*, 112–122.
- [S8] A. Thorn, B. Dittrich and G. M. Sheldrick, *Acta Cryst. A*, **2012**, *68*, 448–451.
- [S9] Rigaku Oxford Diffraction, **2019**, CrysAlisPro Software system, version 1.171.40.67a, Rigaku Corporation, Oxford, UK.
- [S10] M. J. Frisch, G. W. Trucks, H. B. Schlegel, G. E. Scuseria, M. A. Robb, J. R. Cheeseman, G. Scalmani, V. Barone, G. A. Petersson, H. Nakatsuji, X. Li, M. Caricato, A. V. Marenich, J. Bloino, B. G. Janesko, R. Gomperts, B. Mennucci, H. P. Hratchian, J. V. Ortiz, A. F. Izmaylov, J. L. Sonnenberg, D. Williams-Young, F. Ding, F. Lipparini, F. Egidi, J. Goings, B. Peng, A. Petrone, T. Henderson, D. Ranasinghe, V. G. Zakrzewski, J. Gao, N. Rega, G. Zheng, W. Liang, M. Hada, M. Ehara, K. Toyota, R. Fukuda, J. Hasegawa, M. Ishida, T. Nakajima, Y. Honda, O. Kitao, H. Nakai, T. Vreven, K. Throssell, J. A. Montgomery, J. E. Peralta, F. Ogliaro, M. J. Bearpark, J. J. Heyd, E. N. Brothers, K. N. Kudin, V. N. Staroverov, T. A. Keith, R. Kobayashi, J. Normand, K. Raghavachari, A. P. Rendell, J. C. Burant, S. S. Iyengar, J. Tomasi, M. Cossi, J. M. Millam, M. Klene, C. Adamo, R. Cammi, J. W. Ochterski, R. L. Martin, K. Morokuma, O. Farkas, J. B. Foresman, D. J. Fox, Gaussian 16 Rev. A.03, Wallingford CT, **2016**.
- [S11] A. D. Becke, *J. Chem. Phys.* **1993**, *98*, 1372–1377.
- [S12] J. P. Perdew, *Electronic Structure of Solids*, Akademie Verlag, Berlin, **1991**.
- [S13] W. J. Hehre, L. Radom, P. v. R. Schleyer, J. A. Pople, *Ab Initio Molecular Orbital Theory*, John Wiley, New York, **1986**.
- [S14] R. C. Binning, L. A. Curtiss, *J. Comput. Chem.* **1990**, *11*, 1206–1216.
- [S15] T. Clark, J. Chandrasekhar, G. W. Spitznagel, P. v. R. Schleyer, *J. Comp. Chem.* **1983**, *4*, 294–301.
- [S16] G. Scalmani, M. J. Frisch, *J. Chem. Phys.* **2010**, *132*, 114110-1–16.
- [S17] H. Elsen, F. Christian, G. Ballmann, S. Harder, *Angew. Chemie - Int. Ed.* **2018**, *57*, 7156–7160.
